# Supplementary material for: Functionalized guanidinium chloride based colourimetric sensors for fluoride and acetate: single crystal X-ray structural evidence of -NH deprotonation and complexation
Source: Royal Society of Chemistry journal article supplement (doi:10.1039/c0ob00947d), 2011-01-01
Supplement: c0ob00947d.pdf [file c0ob00947d.pdf]

**Supporting Information**  
**Functionalized Guanidinium Chloride Based Colourimetric Sensors for Fluoride and Acetate:  
Single Crystal X-ray Structural Evidence of -NH Deprotonation and Complexation**

Purnandhu Bose, Nisar B. Ahamed and Pradyut Ghosh\*

*Department of Inorganic Chemistry, Indian Association for the Cultivation of Science, 2A & 2B Raja S. C. Mullick  
Road, Kolkata 700032, India. E-mail: [icpg@iacs.res.in](mailto:icpg@iacs.res.in)*

| <b>Contents</b>                                                                                       | <b>Page No.</b> |
|-------------------------------------------------------------------------------------------------------|-----------------|
| 1. <b>Figure S1.</b> <sup>1</sup> H-NMR spectrum of <b>S1</b> in DMSO-d <sub>6</sub> at 25°C.....     | 4               |
| 2. <b>Figure S2.</b> <sup>13</sup> C-NMR spectrum of <b>S1</b> in DMSO- d <sub>6</sub> at 25°C.....   | 5               |
| 3. <b>Figure S3.</b> HRMS (ESI) Spectrum of <b>S1</b> .....                                           | 6               |
| 4. <b>Figure S4.</b> <sup>1</sup> H-NMR spectrum of <b>S2</b> in DMSO- d <sub>6</sub> at 25°C.....    | 7               |
| 5. <b>Figure S5.</b> <sup>13</sup> C-NMR spectrum of <b>S2</b> in DMSO- d <sub>6</sub> at 25°C.....   | 8               |
| 6. <b>Figure S6.</b> HRMS (ESI) Spectrum of <b>S2</b> .....                                           | 9               |
| 7. <b>Figure S7.</b> <sup>1</sup> H-NMR spectrum of <b>S3</b> in DMSO- d <sub>6</sub> at 25°C.....    | 10              |
| 8. <b>Figure S8.</b> <sup>13</sup> C-NMR spectrum of <b>S3</b> in DMSO- d <sub>6</sub> at 25°C.....   | 11              |
| 9. <b>Figure S9.</b> HRMS (ESI) Spectrum of <b>S3</b> .....                                           | 12              |
| 10. <b>Figure S10.</b> <sup>1</sup> H-NMR spectrum of <b>S4</b> in DMSO- d <sub>6</sub> at 25°C.....  | 13              |
| 11. <b>Figure S11.</b> <sup>13</sup> C-NMR spectrum of <b>S4</b> in DMSO- d <sub>6</sub> at 25°C..... | 14              |
| 12. <b>Figure S12.</b> HRMS (ESI) Spectrum of <b>S4</b> .....                                         | 15              |
| 13. <b>Figure S13.</b> <sup>1</sup> H-NMR spectrum of <b>S5</b> in DMSO- d <sub>6</sub> at 25°C.....  | 16              |
| 14. <b>Figure S14.</b> <sup>13</sup> C-NMR spectrum of <b>S5</b> in DMSO- d <sub>6</sub> at 25°C..... | 17              |

|     |                                                                                                                            |    |
|-----|----------------------------------------------------------------------------------------------------------------------------|----|
| 15. | <b>Figure S15.</b> HRMS (ESI) Spectrum of <b>S5</b> .....                                                                  | 18 |
| 16. | <b>Figure S16.</b> <sup>1</sup> H-NMR spectrum of <b>S6</b> in DMSO- d <sub>6</sub> at 25°C.....                           | 19 |
| 17. | <b>Figure S17.</b> <sup>13</sup> C-NMR spectrum of <b>S6</b> in DMSO- d <sub>6</sub> at 25°C .....                         | 20 |
| 18. | <b>Figure S18.</b> HRMS (ESI) Spectrum of <b>S6</b> .....                                                                  | 21 |
| 19. | <b>Figure S19.</b> <sup>1</sup> H-NMR spectrum of <b>S7</b> in DMSO- d <sub>6</sub> at 25°C .....                          | 22 |
| 20. | <b>Figure S20.</b> <sup>13</sup> C-NMR spectrum of <b>S7</b> in DMSO- d <sub>6</sub> at 25°C .....                         | 23 |
| 21. | <b>Figure S21.</b> HRMS (ESI) Spectrum of <b>S7</b> .....                                                                  | 24 |
| 22. | <b>Figure S22.</b> <sup>1</sup> H-NMR spectrum of <b>S8</b> in DMSO- d <sub>6</sub> at 25°C .....                          | 25 |
| 23. | <b>Figure S23.</b> <sup>13</sup> C-NMR spectrum of <b>S8</b> in DMSO- d <sub>6</sub> at 25°C .....                         | 26 |
| 24. | <b>Figure S24.</b> HRMS (ESI) Spectrum of <b>S8</b> .....                                                                  | 27 |
| 25. | <b>Figure S25.</b> <sup>1</sup> H-NMR spectrum of <b>S9</b> in DMSO- d <sub>6</sub> at 25°C .....                          | 28 |
| 26. | <b>Figure S26.</b> <sup>13</sup> C-NMR spectrum of <b>S9</b> in DMSO- d <sub>6</sub> at 25°C .....                         | 29 |
| 27. | <b>Figure S27.</b> HRMS (ESI) Spectrum of <b>S9</b> .....                                                                  | 30 |
| 28. | <b>Figure S28.</b> <sup>1</sup> H-NMR spectrum of <b>S10</b> in DMSO- d <sub>6</sub> at 25°C.....                          | 31 |
| 29. | <b>Figure S29.</b> <sup>13</sup> C-NMR spectrum of <b>S10</b> in DMSO- d <sub>6</sub> at 25°C.....                         | 32 |
| 30. | <b>Figure S30.</b> HRMS (ESI) Spectrum of <b>S10</b> .....                                                                 | 33 |
| 31. | <b>Figure S31.</b> Optical spectrum of <b>S5-S9</b> in presence of various anions .....                                    | 34 |
| 32. | <b>Figure S32.</b> Optical spectrum of <b>S10-S12</b> in presence of various anions .....                                  | 35 |
| 33. | <b>Figure S33.</b> Selectivity study of <b>S9</b> (1x10 <sup>-4</sup> M) in presence of different anions ( 30 equiv.)..... | 36 |
| 34. | <b>Figure S34.</b> UV-Vis titration of <b>S1</b> in presence of F <sup>-</sup> .....                                       | 37 |
| 35. | <b>Figure S35.</b> UV-Vis titration of <b>S2</b> in presence of F <sup>-</sup> .....                                       | 38 |

|     |                                                                                                 |    |
|-----|-------------------------------------------------------------------------------------------------|----|
| 36. | <b>Figure S36.</b> UV-Vis titration of <b>S2</b> in presence of $\text{AcO}^-$ .....            | 39 |
| 37. | <b>Figure S37.</b> UV-Vis titration of <b>S2</b> in presence of $\text{H}_2\text{PO}_4^-$ ..... | 40 |
| 38. | <b>Figure S38.</b> UV-Vis titration of <b>S3</b> in presence of $\text{F}^-$ .....              | 41 |
| 39. | <b>Figure S39.</b> UV-Vis titration of <b>S3</b> in presence of $\text{AcO}^-$ .....            | 42 |
| 40. | <b>Figure S40.</b> UV-Vis titration of <b>S3</b> in presence of $\text{H}_2\text{PO}_4^-$ ..... | 43 |
| 41. | <b>Figure S41.</b> UV-Vis titration of <b>S4</b> in presence of $\text{F}^-$ .....              | 44 |
| 42. | <b>Figure S42.</b> UV-Vis titration of <b>S4</b> in presence of $\text{AcO}^-$ .....            | 45 |
| 43. | <b>Figure S43.</b> UV-Vis titration of <b>S6</b> in presence of $\text{F}^-$ .....              | 46 |
| 44. | <b>Figure S44.</b> UV-Vis titration of <b>S6</b> in presence of $\text{AcO}^-$ .....            | 47 |
| 45. | <b>Figure S45.</b> UV-Vis titration of <b>S7</b> in presence of $\text{F}^-$ .....              | 48 |
| 46. | <b>Figure S46.</b> UV-Vis titration of <b>S8</b> in presence of $\text{F}^-$ .....              | 49 |
| 47. | <b>Figure S47.</b> UV-Vis titration of <b>S9</b> in presence of $\text{F}^-$ .....              | 50 |
| 48. | <b>Figure S48.</b> UV-Vis titration of <b>S9</b> in presence of $\text{AcO}^-$ .....            | 51 |
| 49. | <b>Figure S49.</b> UV-Vis titration of <b>S9</b> in presence of $\text{H}_2\text{PO}_4^-$ ..... | 52 |
| 50. | <b>Figure S50.</b> UV-Vis titration of <b>S10</b> in presence of $\text{F}^-$ .....             | 53 |
| 51. | <b>Table S1.</b> Table of Crystallographic parameters.....                                      | 54 |
| 52. | <b>Table S2.</b> Hydrogen bonding interactions in <b>1</b> .....                                | 55 |
| 53. | <b>Table S3.</b> Hydrogen bonding interactions in complex <b>2</b> .....                        | 55 |
| 54. | <b>Table S4.</b> Hydrogen bonding interactions in complex <b>3</b> .....                        | 56 |
| 55. | <b>Methods and References.</b> .....                                                            | 57 |

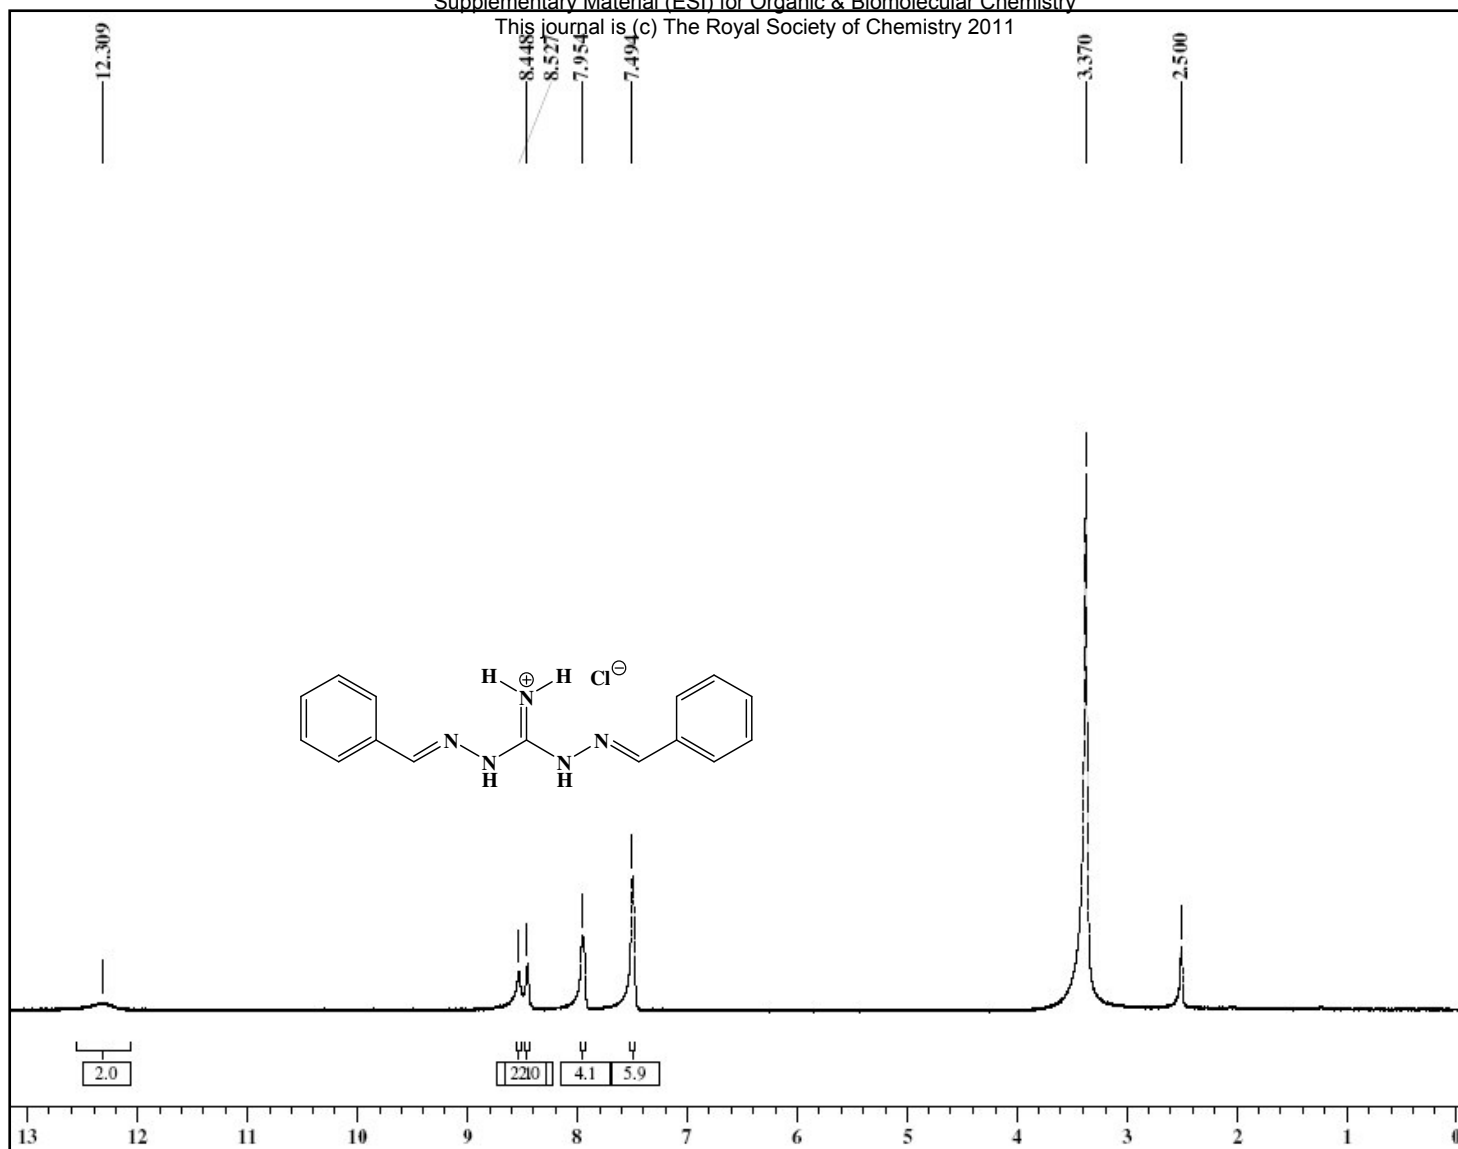**Figure S1.**  $^1\text{H}$  NMR spectrum of **S1** in  $\text{DMSO-d}_6$ .

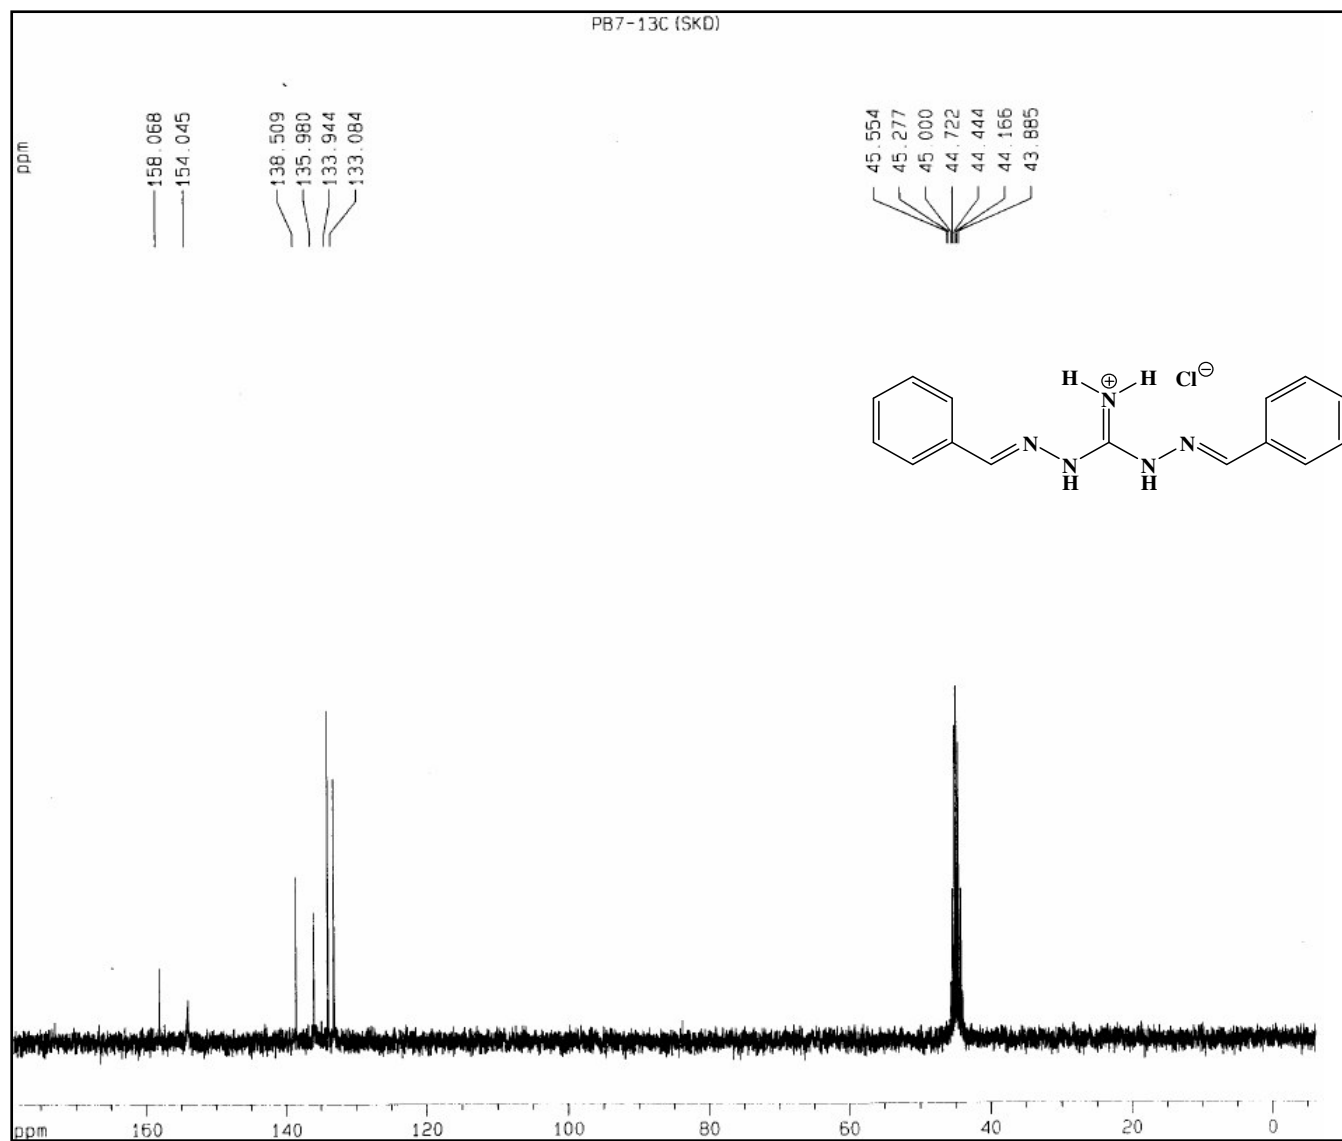

Figure S2.  $^{13}\text{C}$  NMR spectrum of S1 in DMSO- $d_6$ .

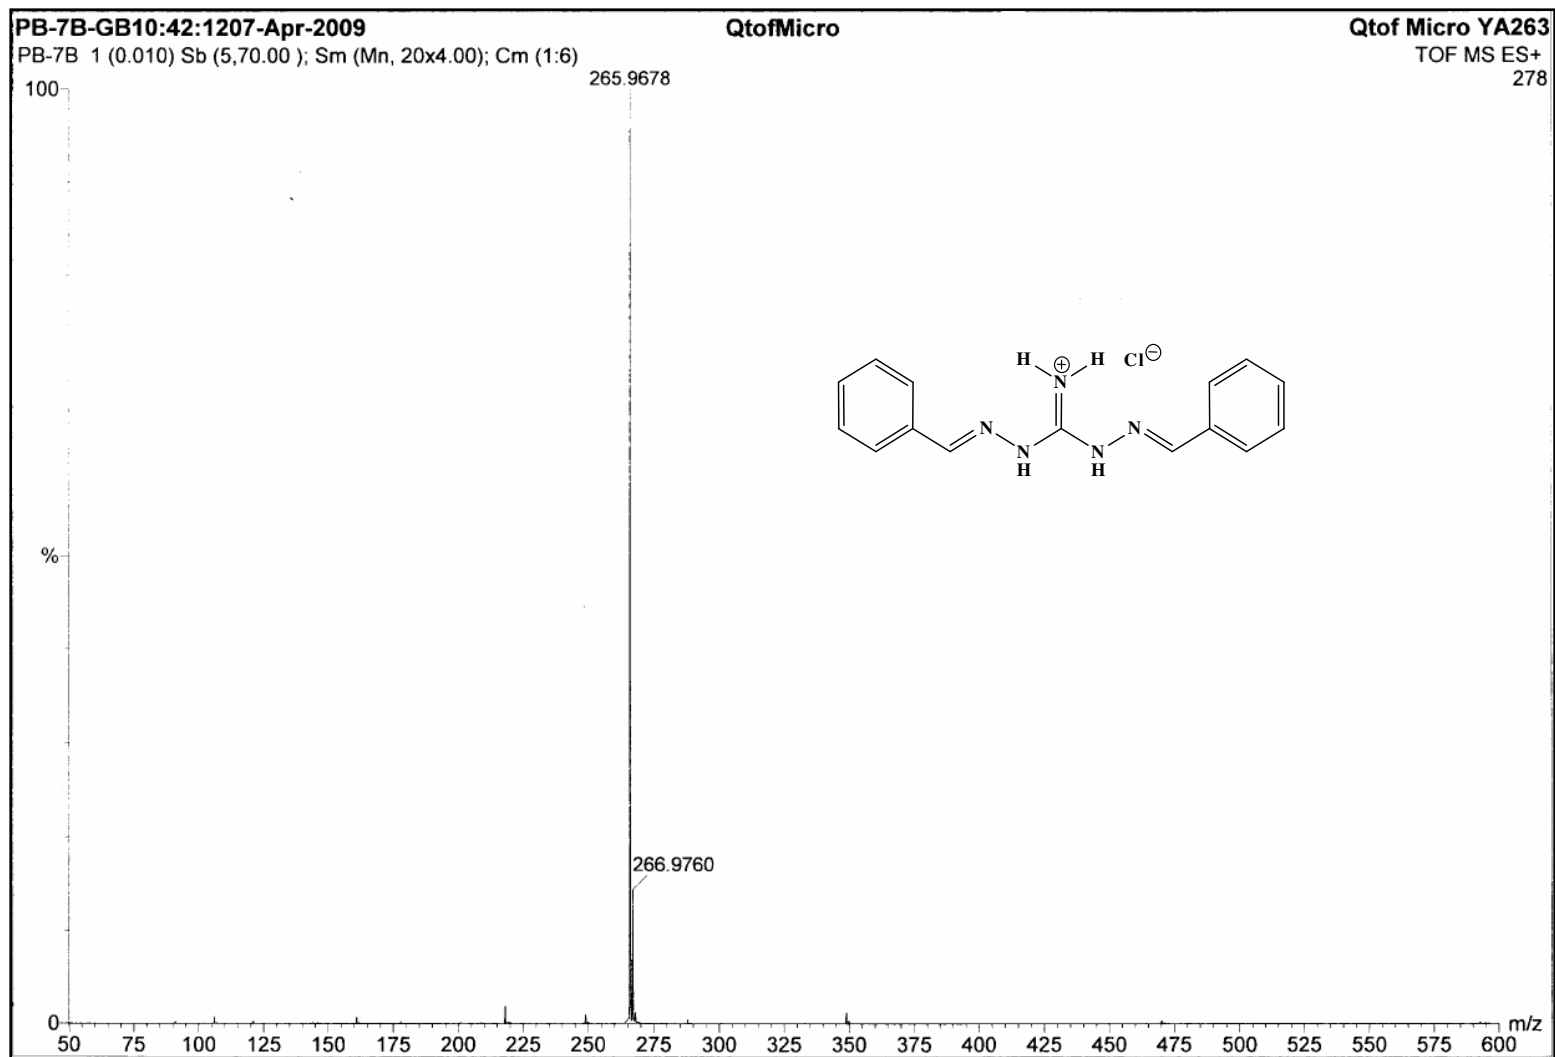

Figure S3. HRMS spectrum of S1.

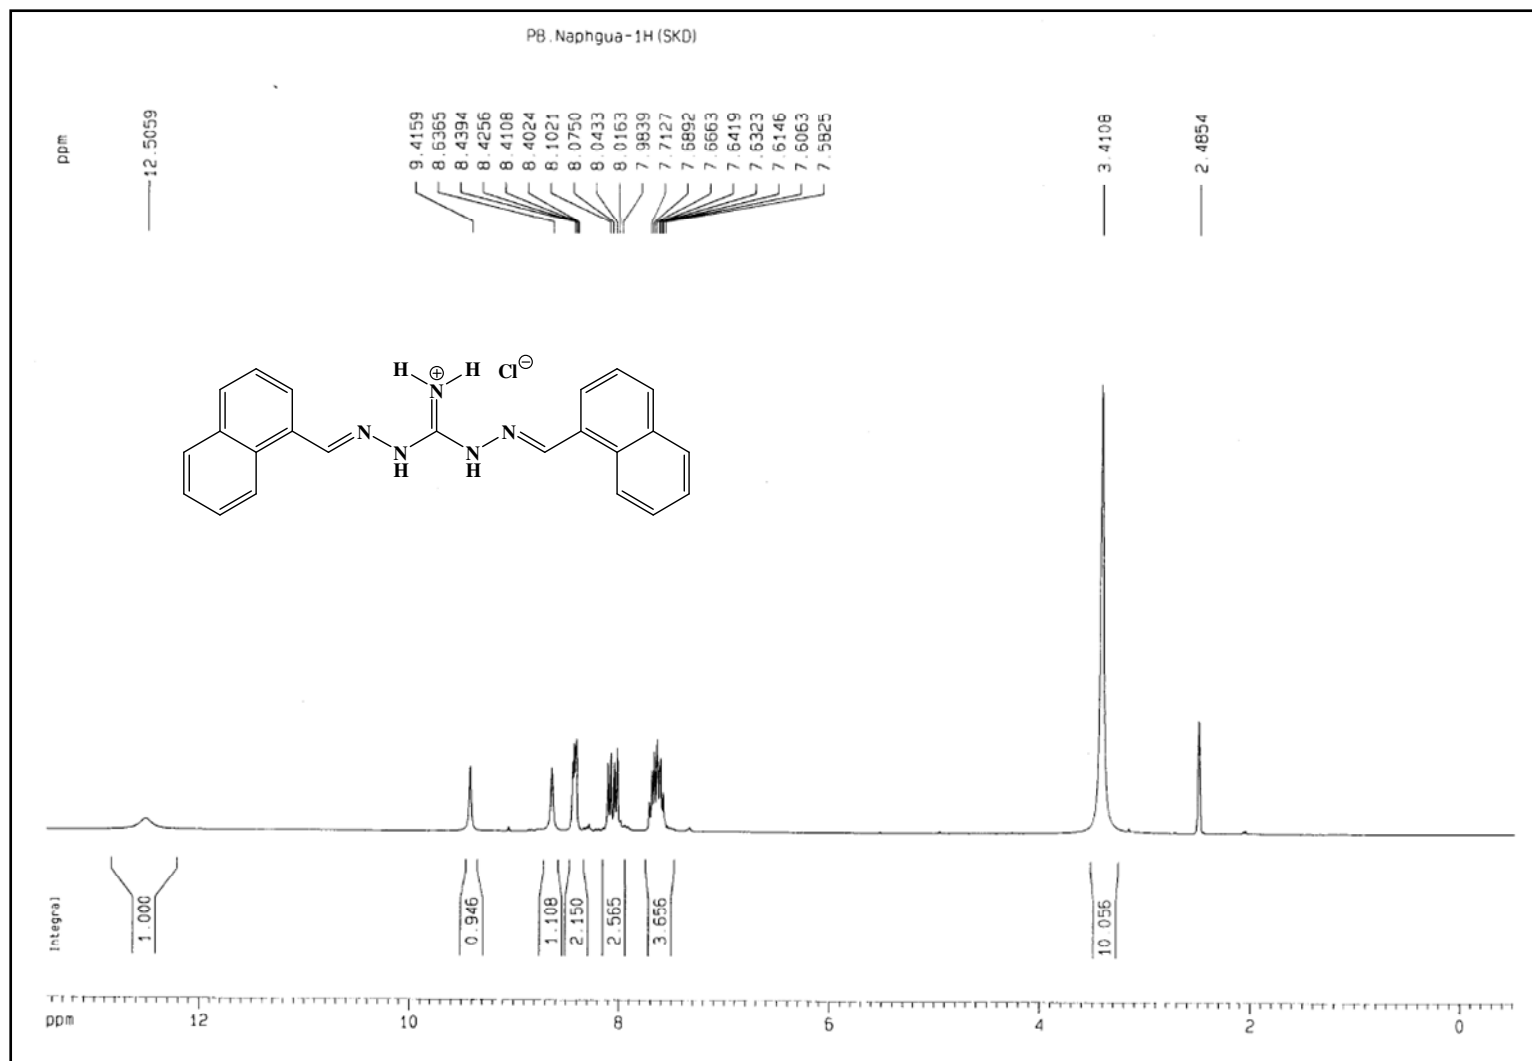

Figure S4. <sup>1</sup>H NMR spectrum of S2 in DMSO-d<sub>6</sub>.

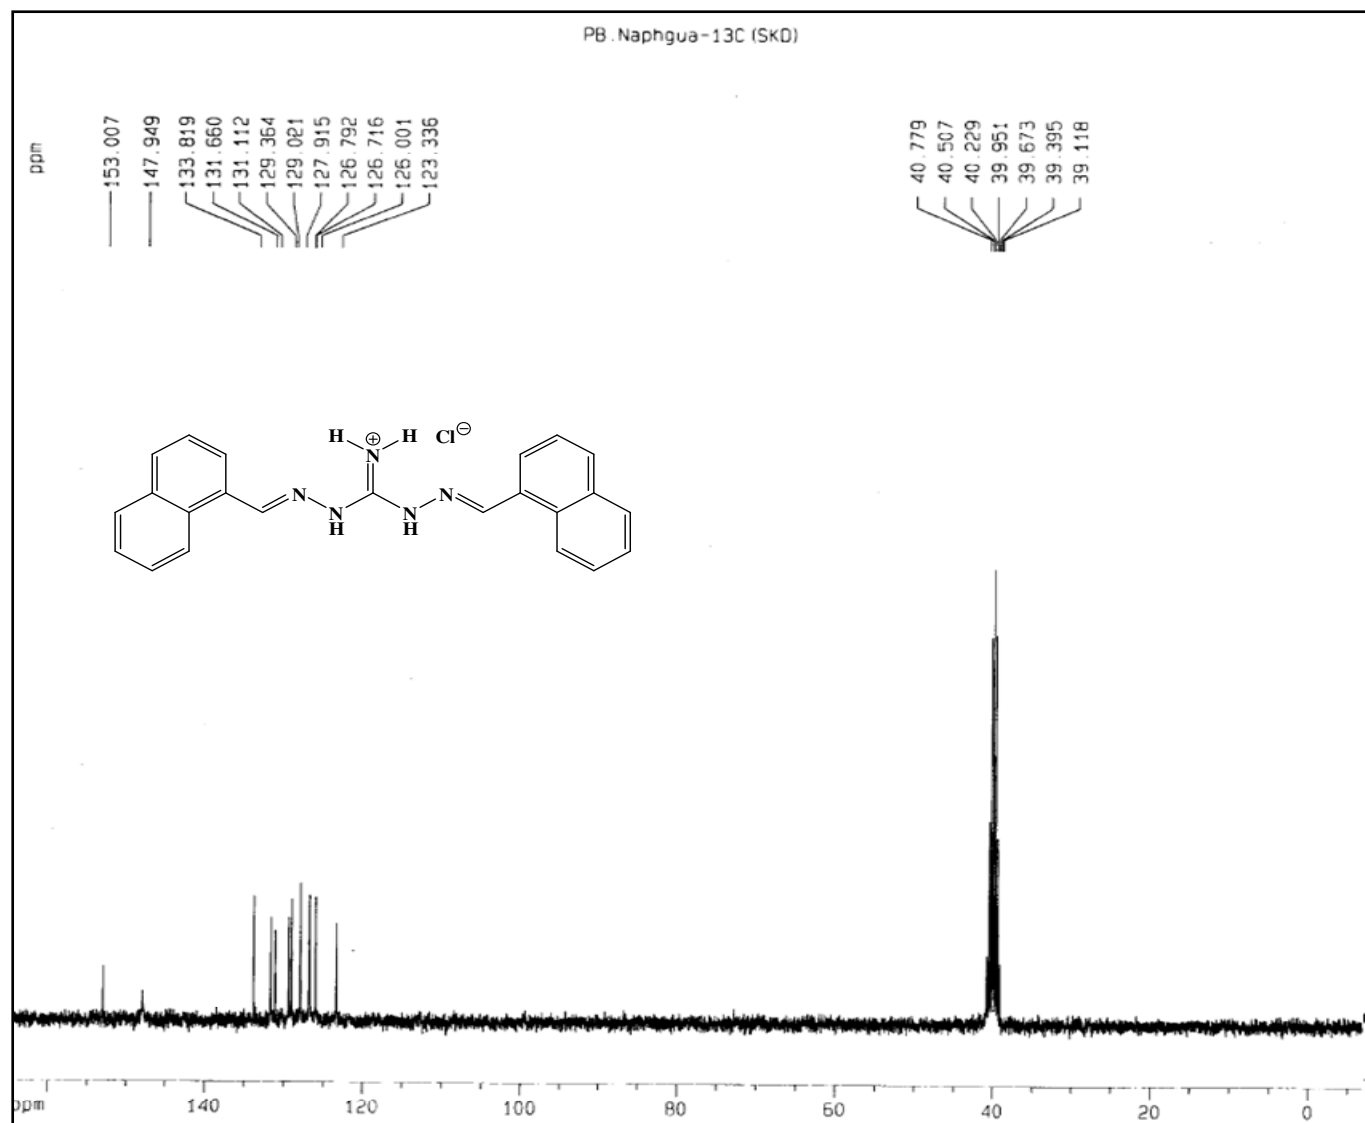

Figure S5.  $^{13}\text{C}$  NMR spectrum of S2 in DMSO- $d_6$ .



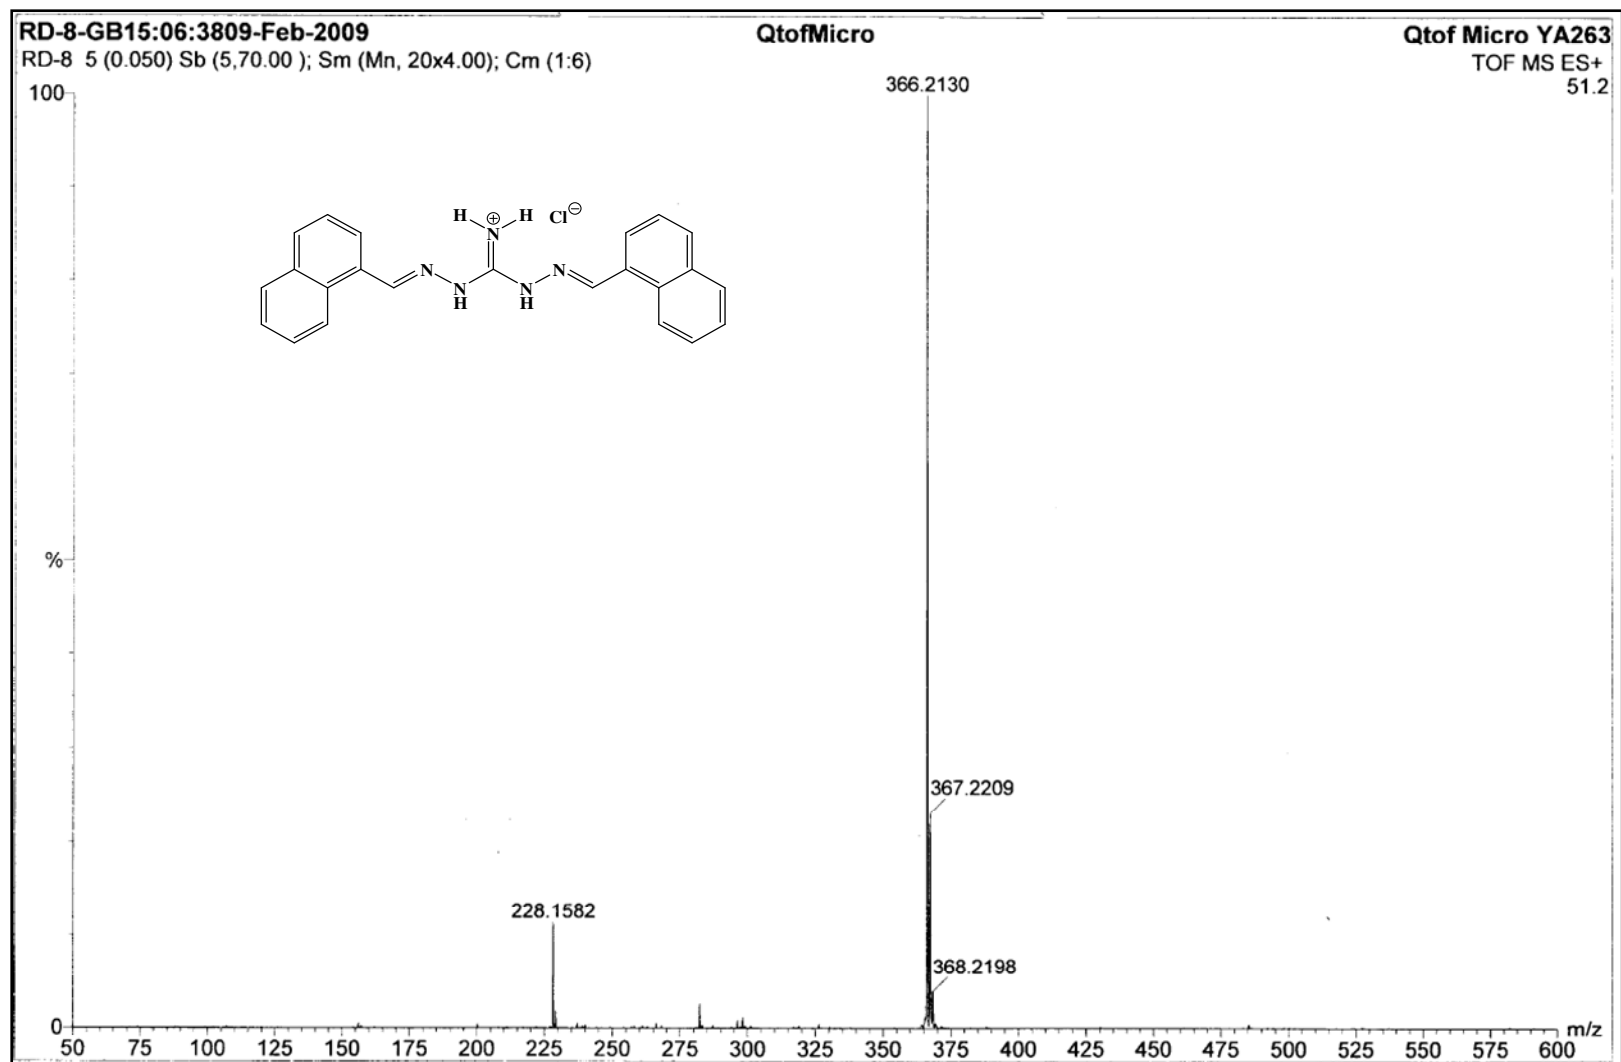

Figure S6. HRMS spectrum of S2.

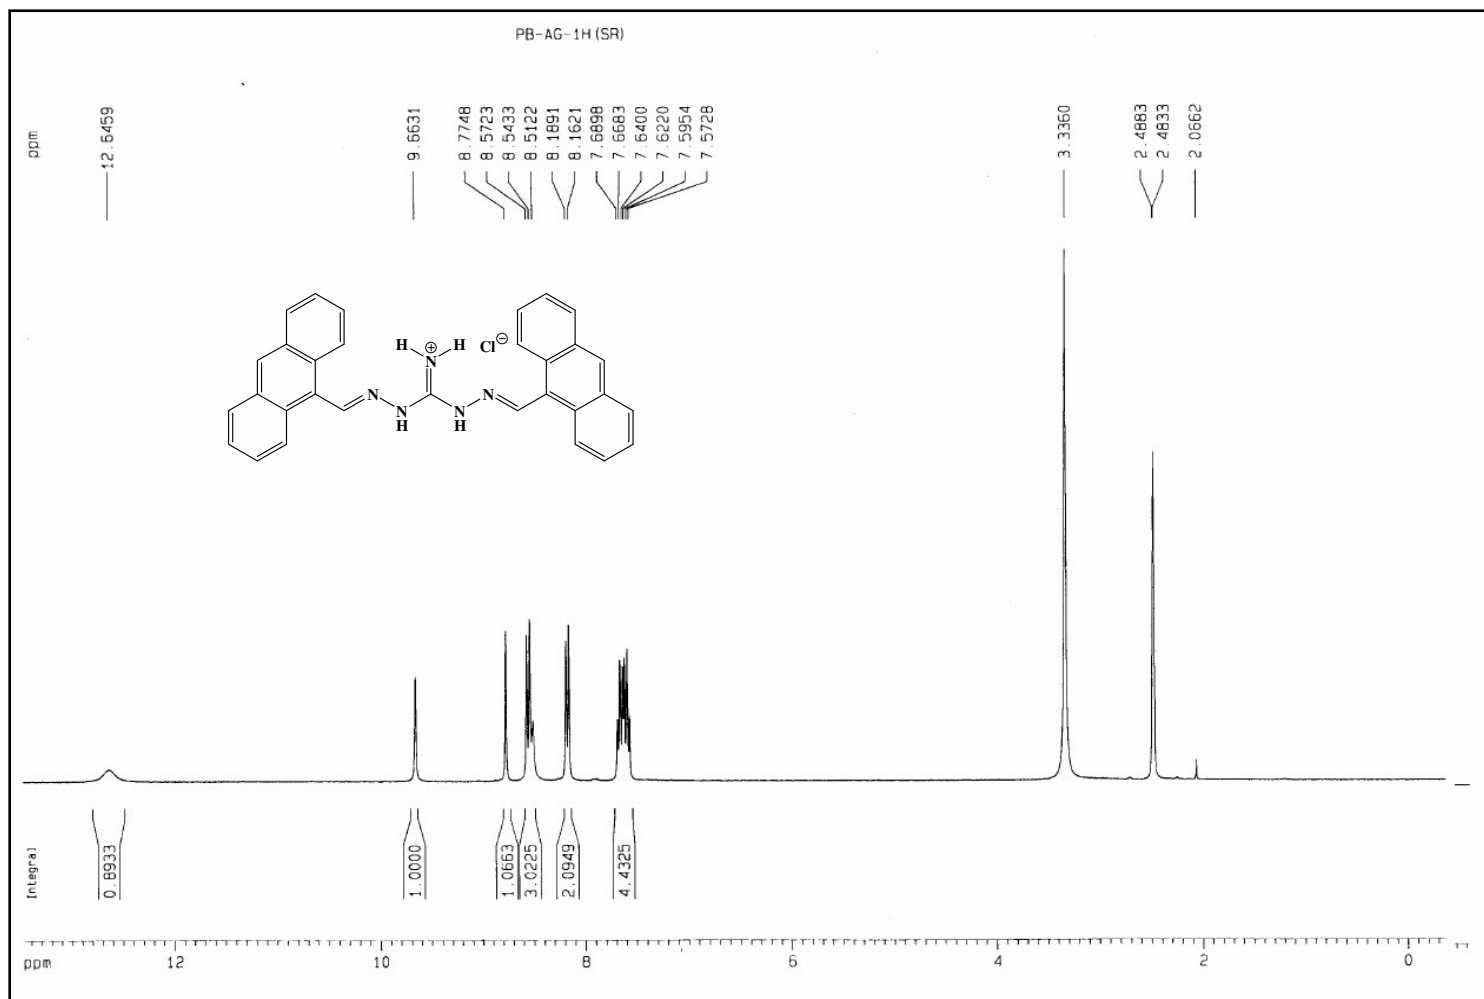

**Figure S7.** <sup>1</sup>H NMR spectrum of **S3** in DMSO-d<sub>6</sub>.

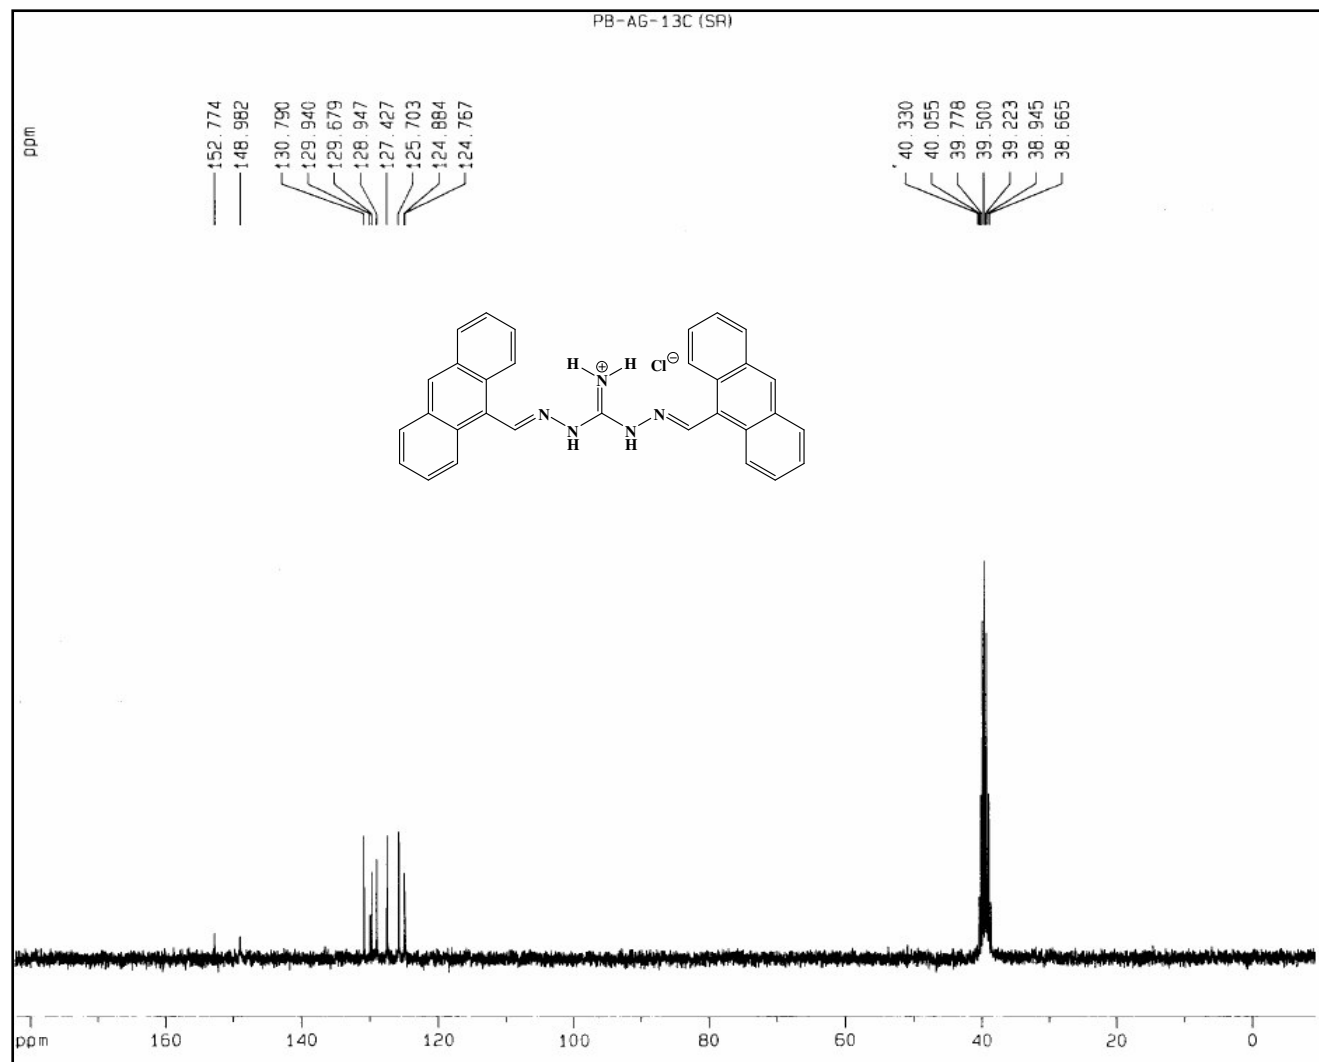

Figure S8.  $^{13}\text{C}$  NMR spectrum of S3 in  $\text{DMSO-d}_6$ .

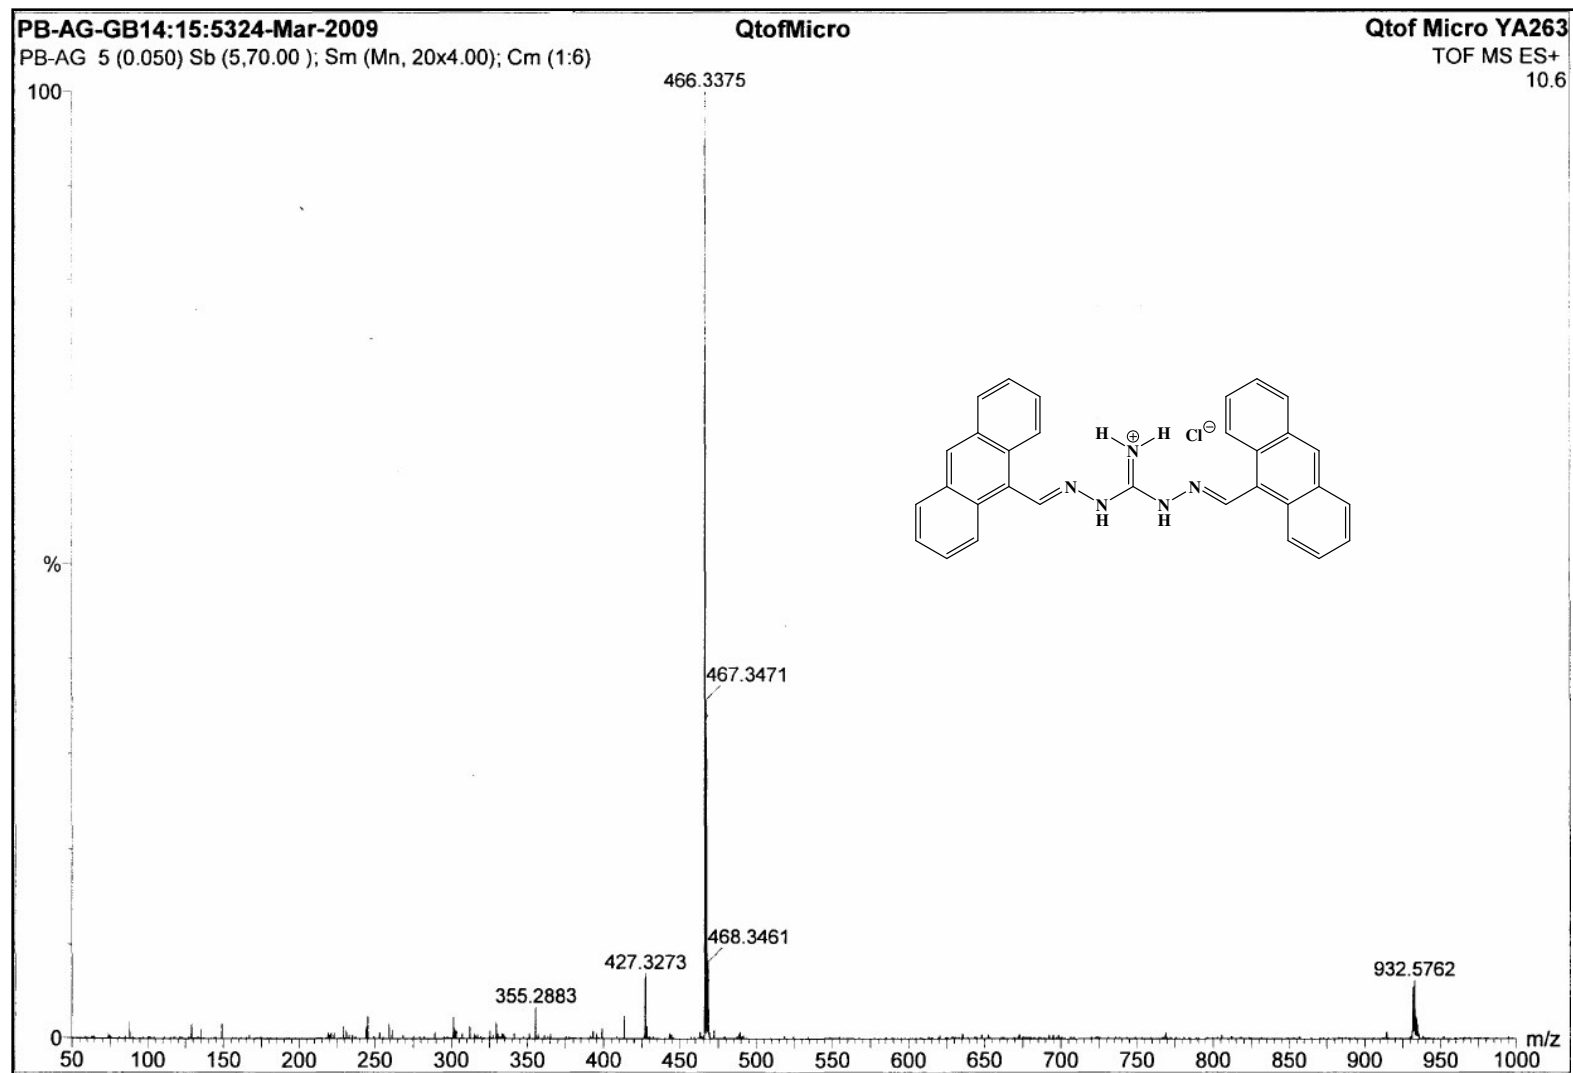

**Figure S9.** HRMS spectrum of **S3**.

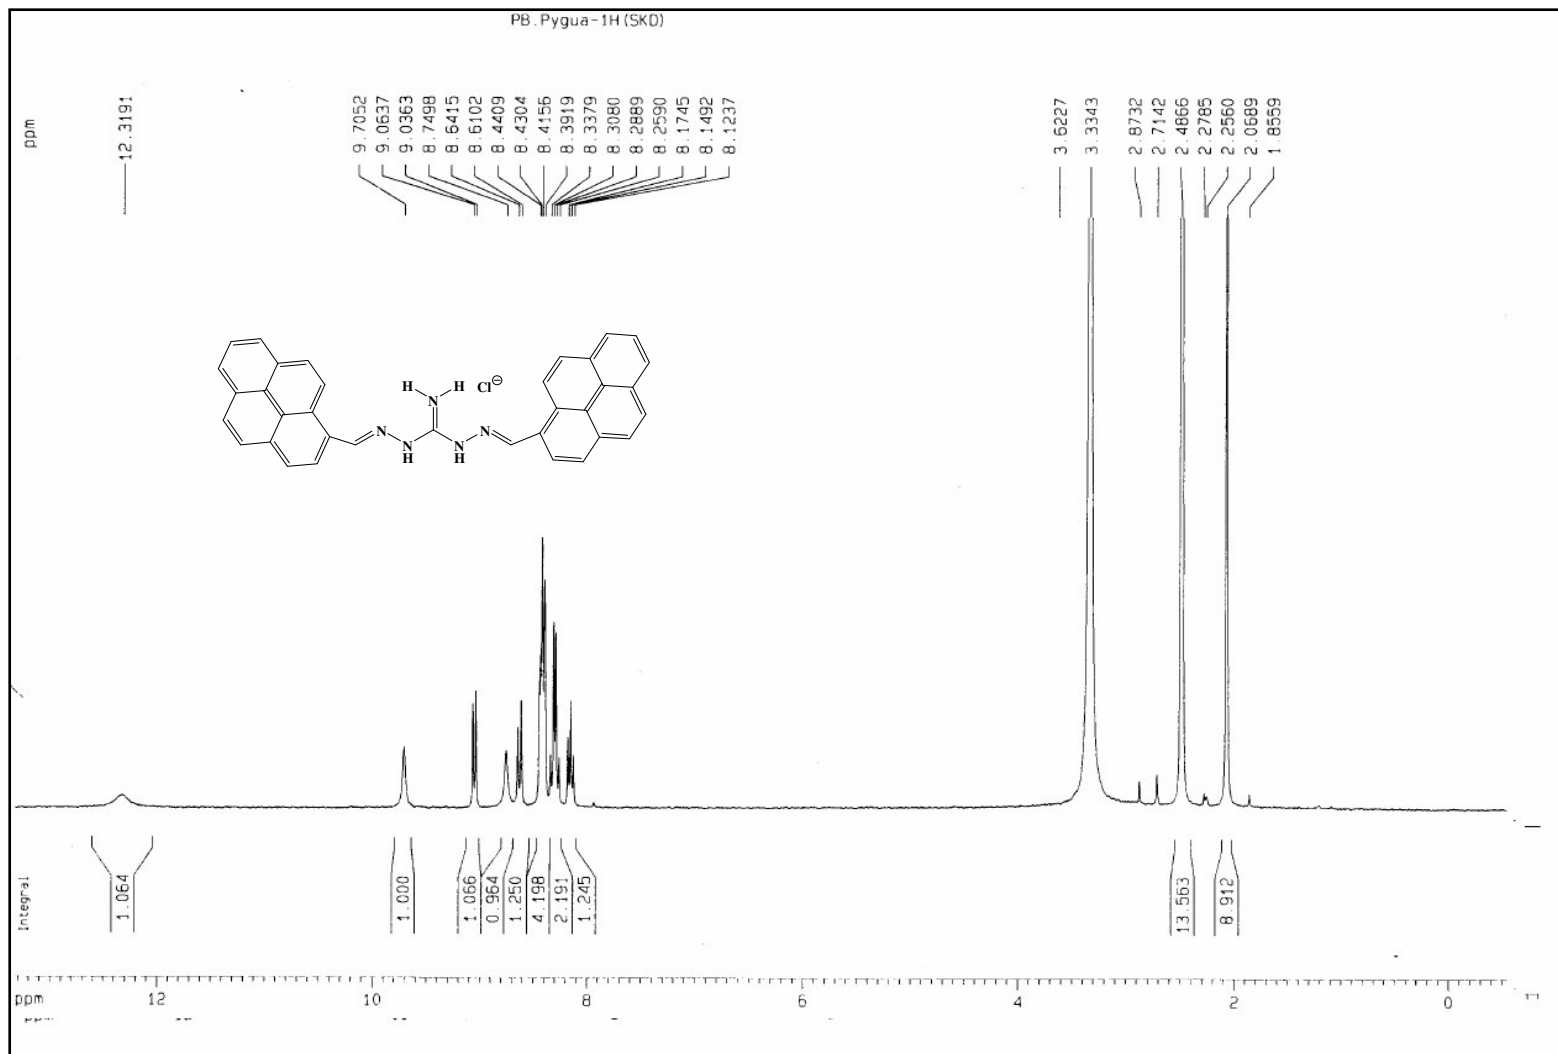

Figure S10. <sup>1</sup>H NMR spectrum of S4 in DMSO-d<sub>6</sub>.

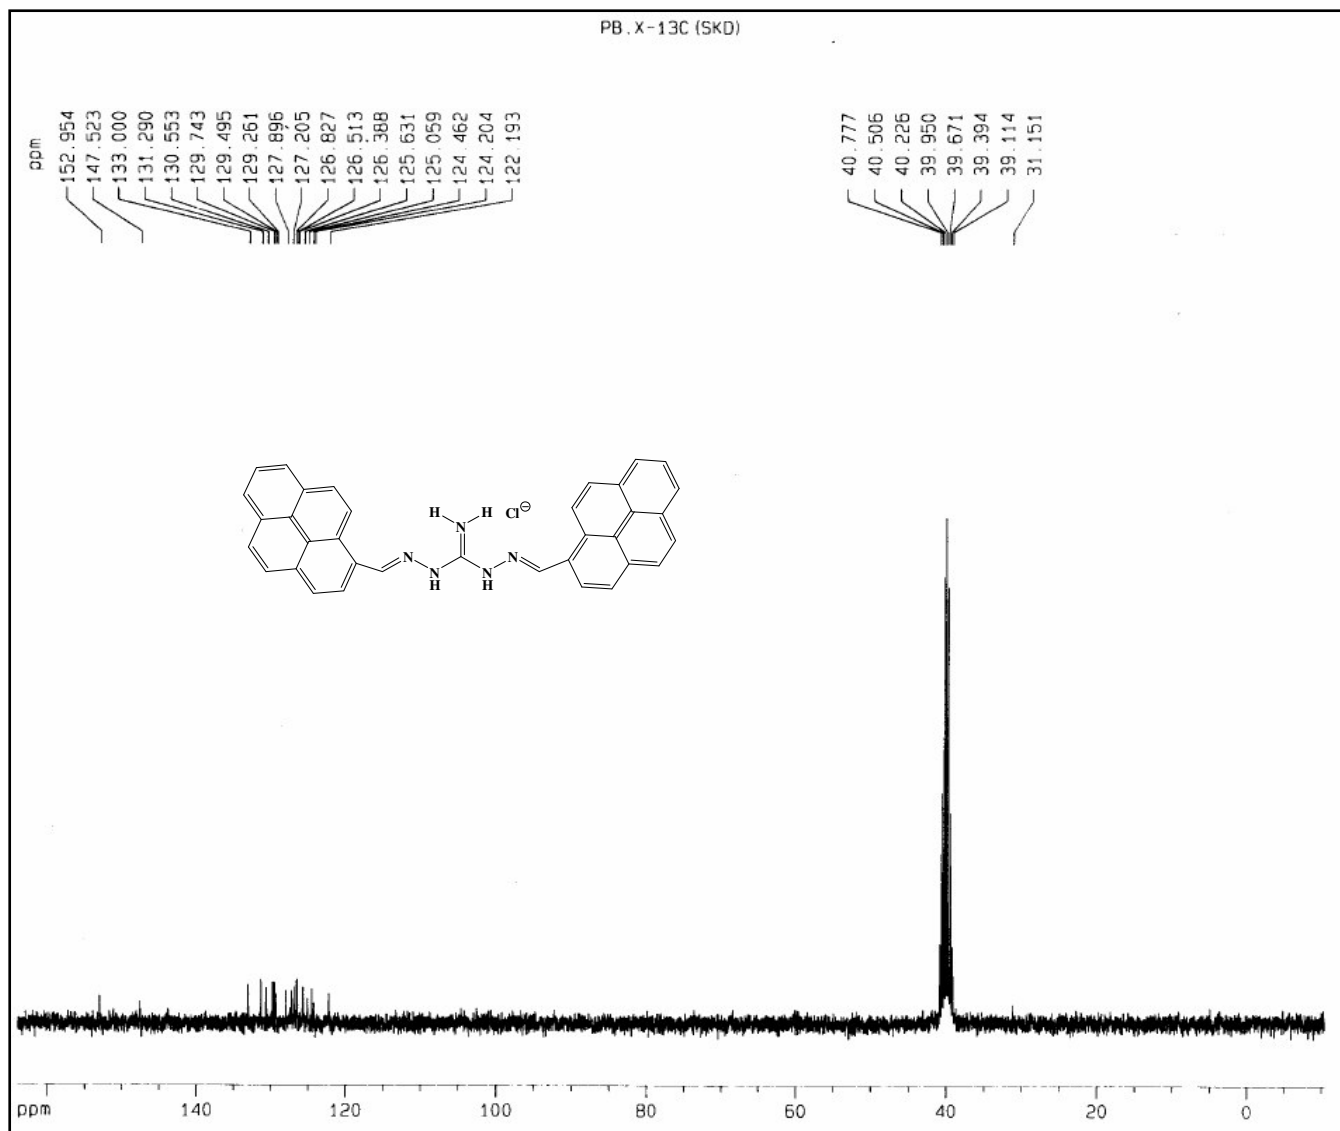

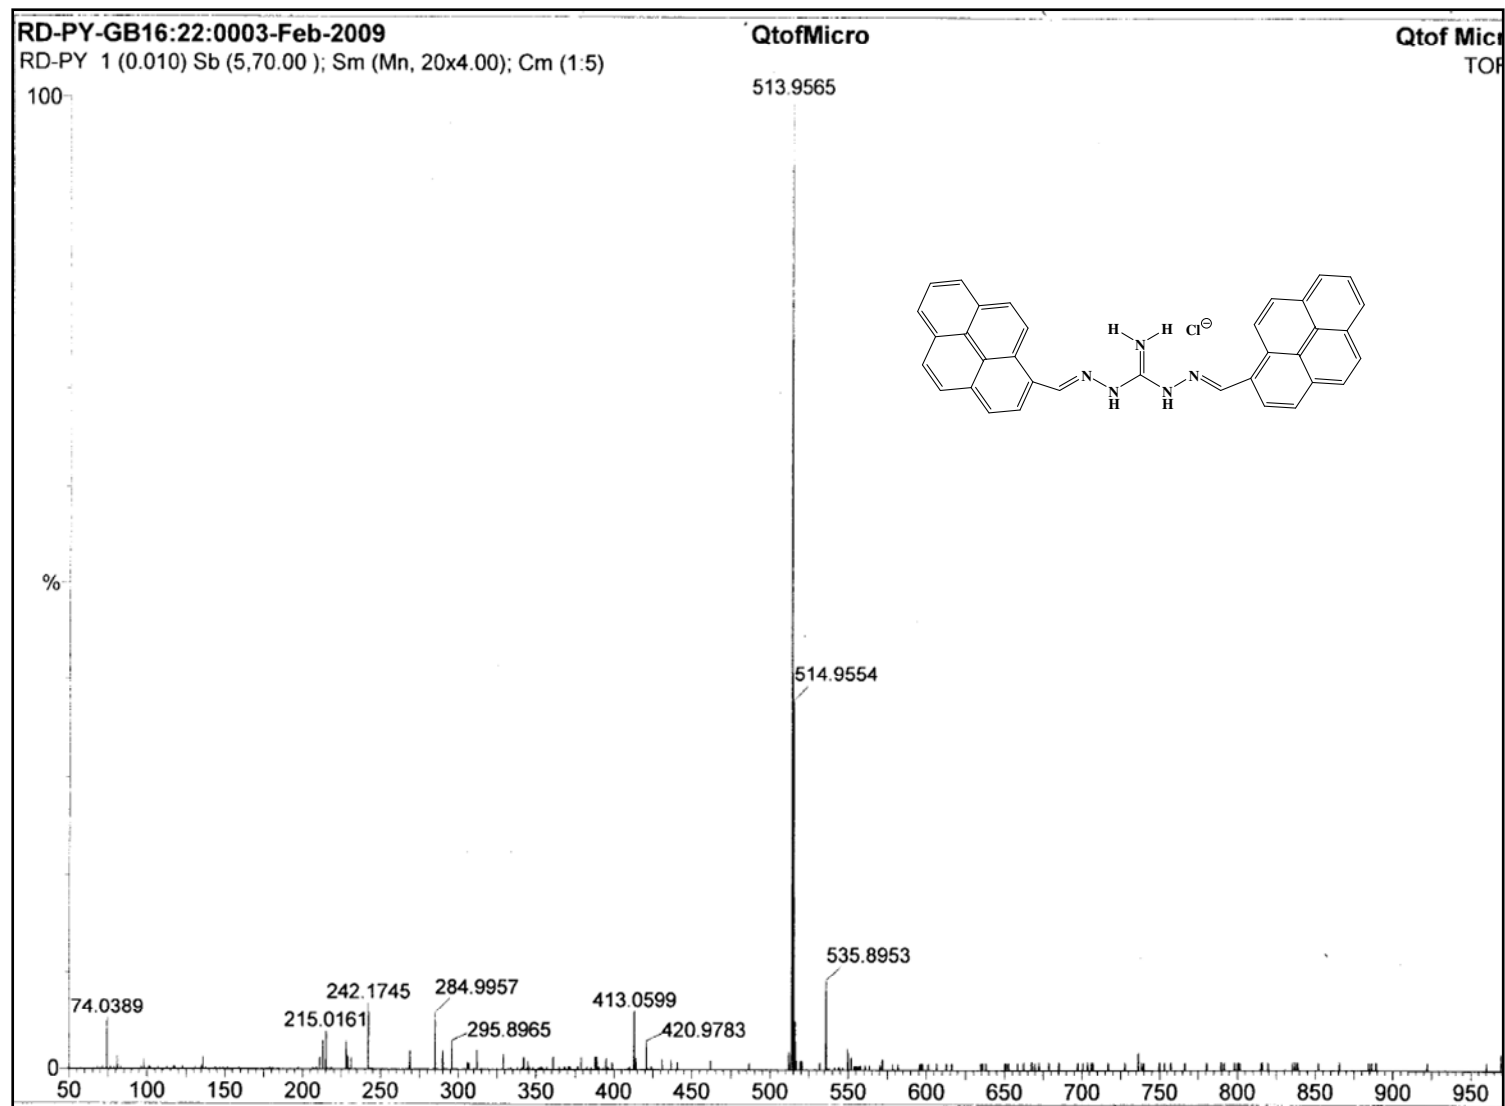

Figure S12. HRMS spectrum of S4.

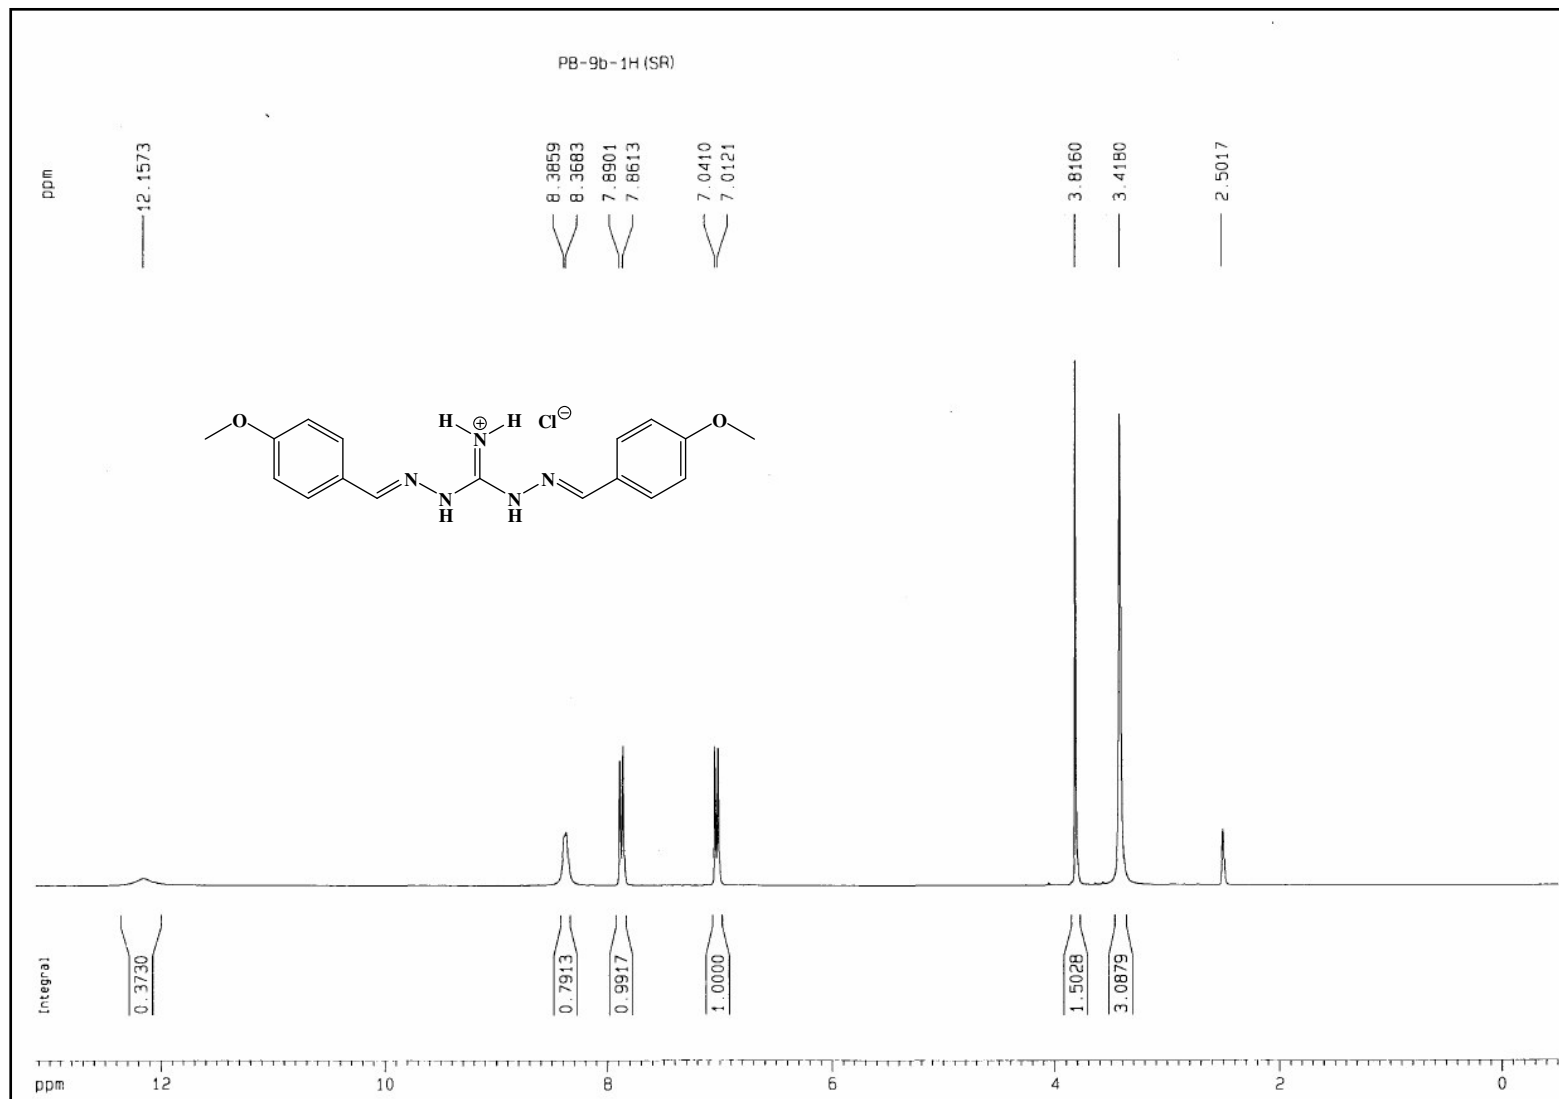

Figure S13.  $^1\text{H}$  NMR spectrum of S5 in  $\text{DMSO-d}_6$ .



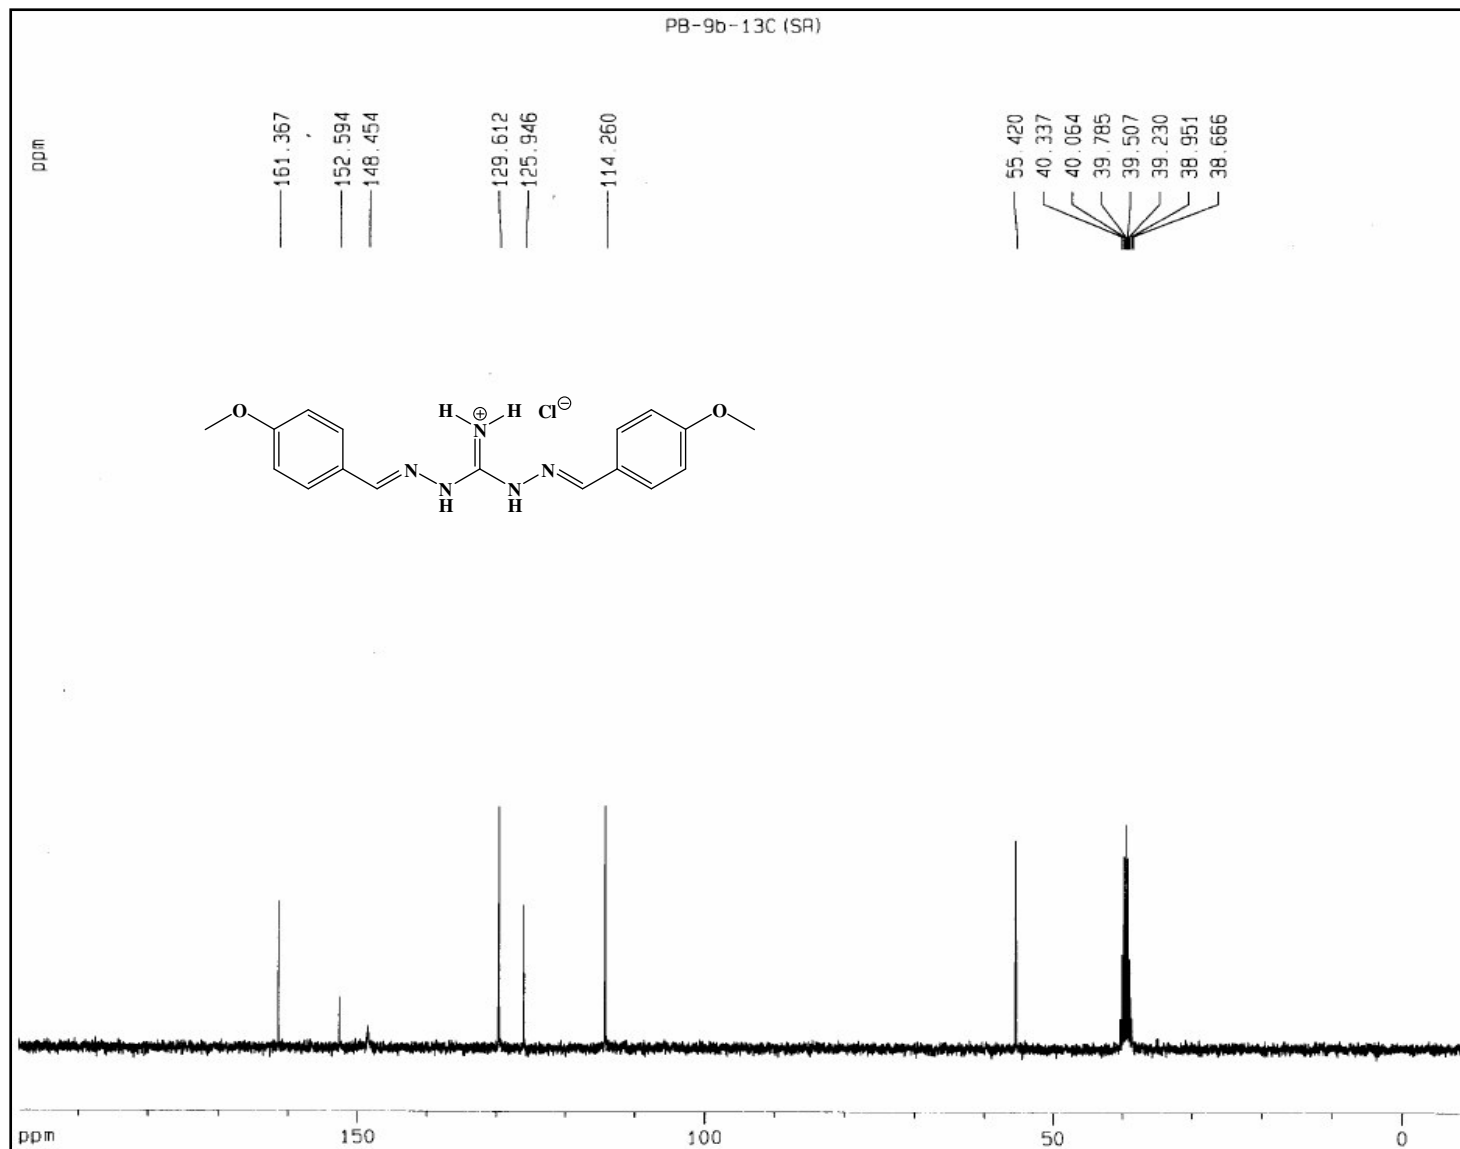

Figure S14.  $^{13}\text{C}$  NMR spectrum of **S5** in  $\text{DMSO-d}_6$ .

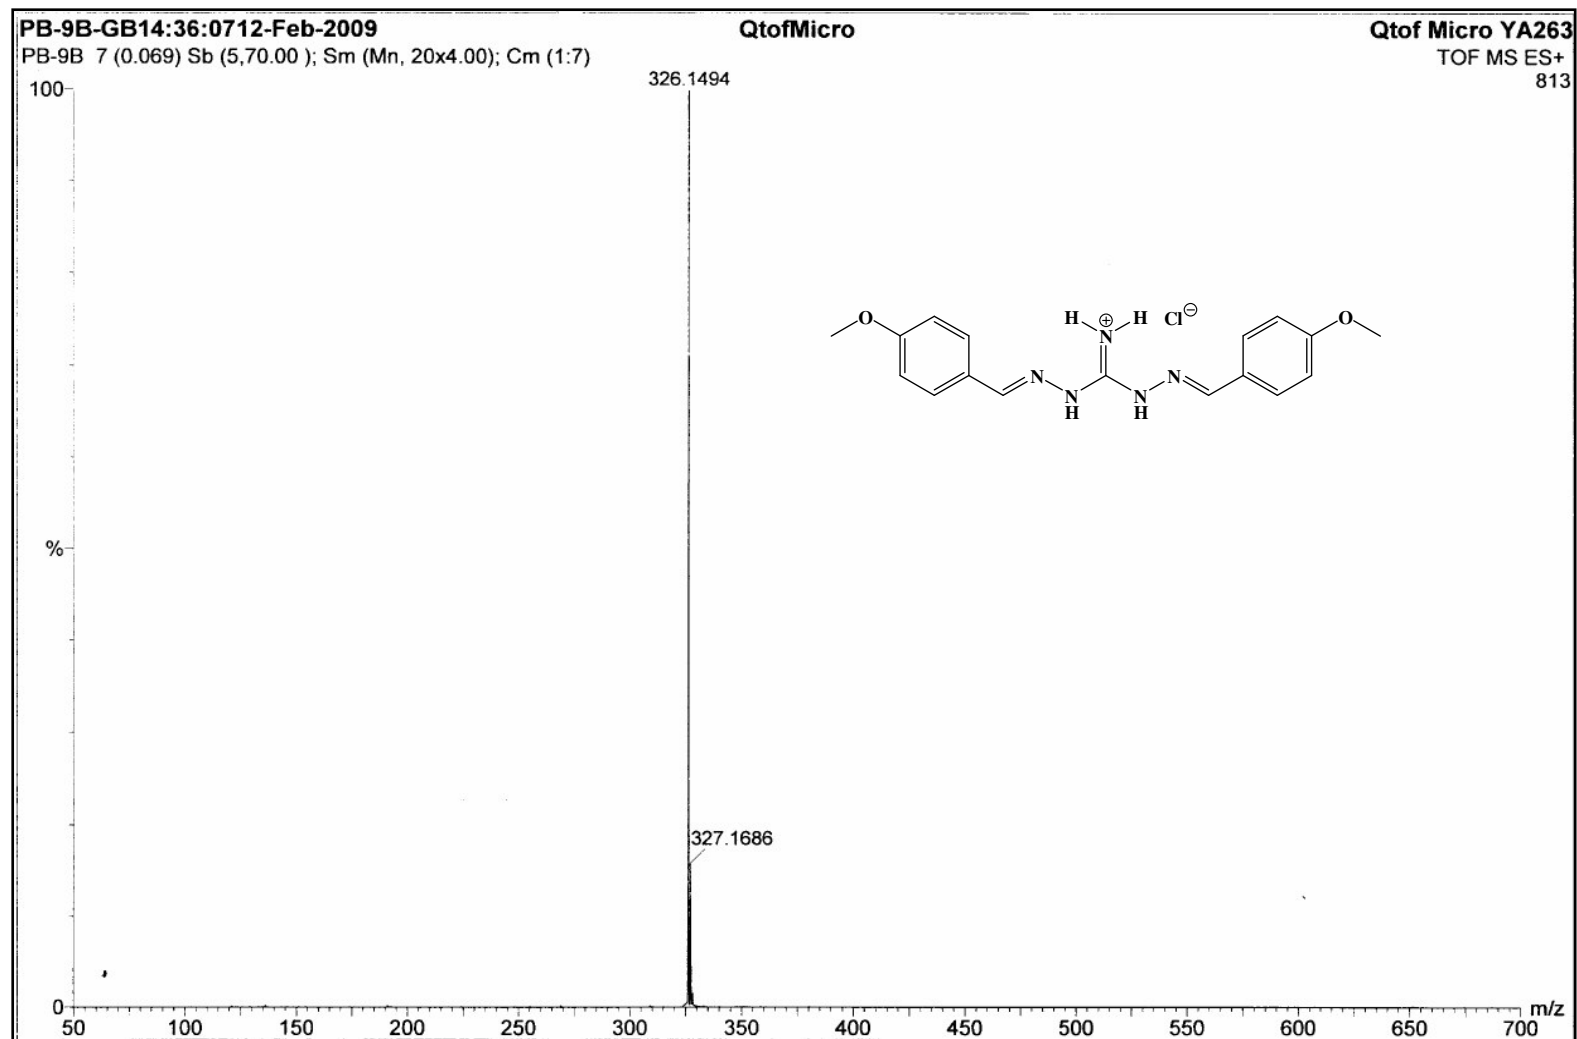

Figure S15. HRMS spectrum of S5.

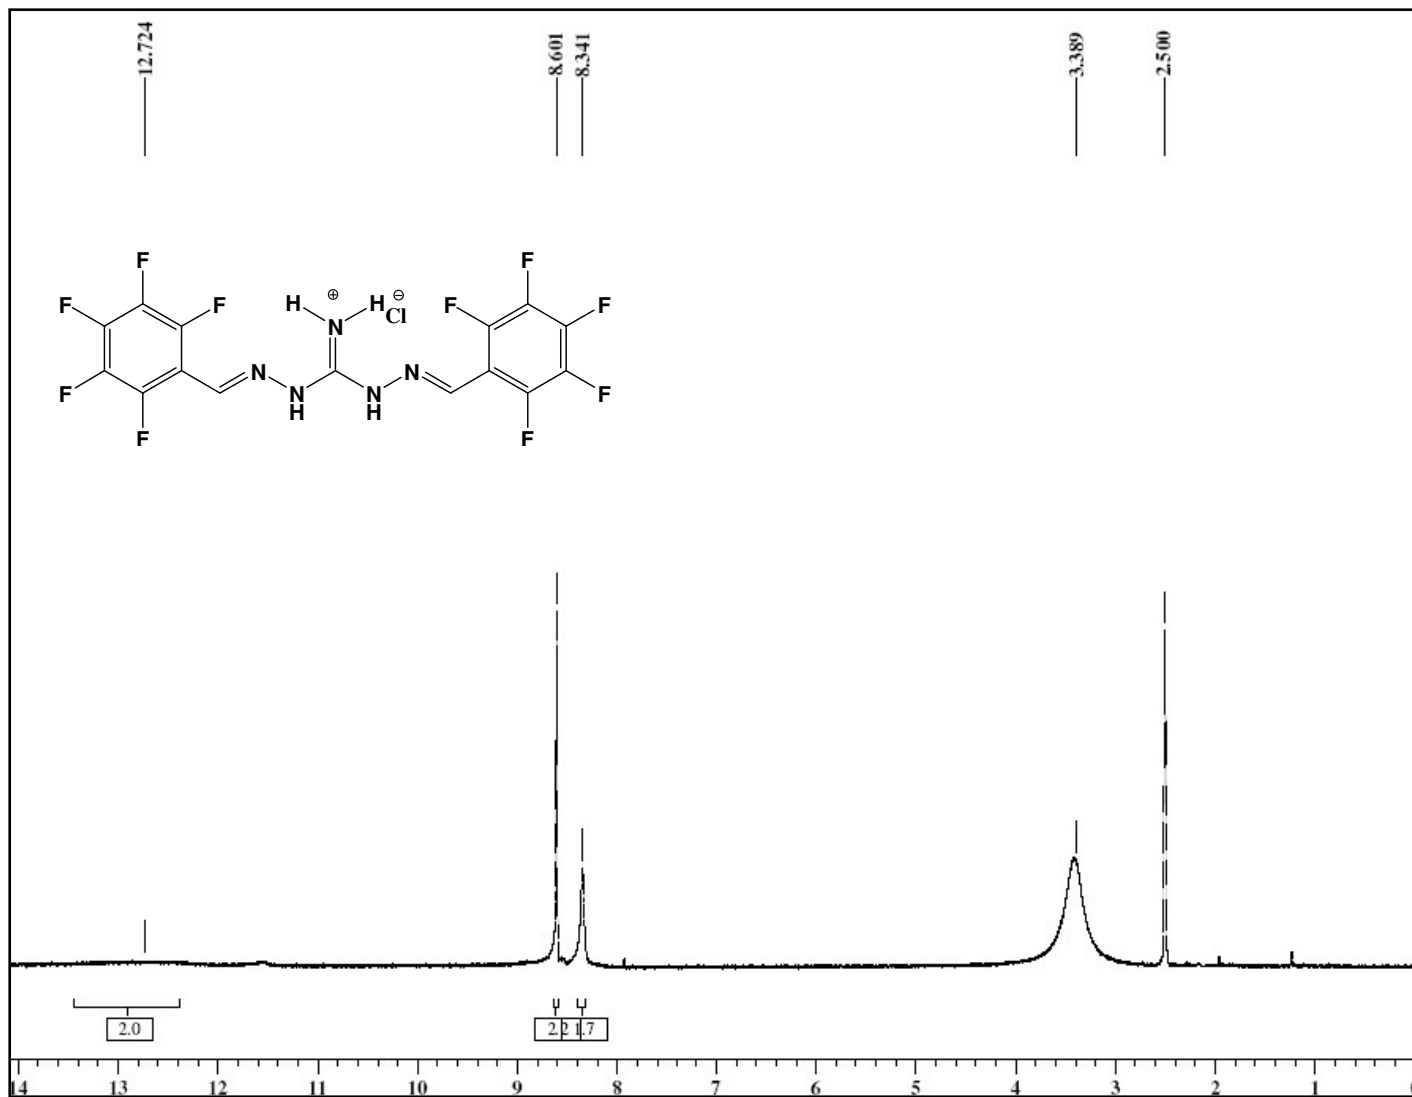

Figure S16.  $^1\text{H}$  NMR spectrum of S6 in  $\text{DMSO-d}_6$ .

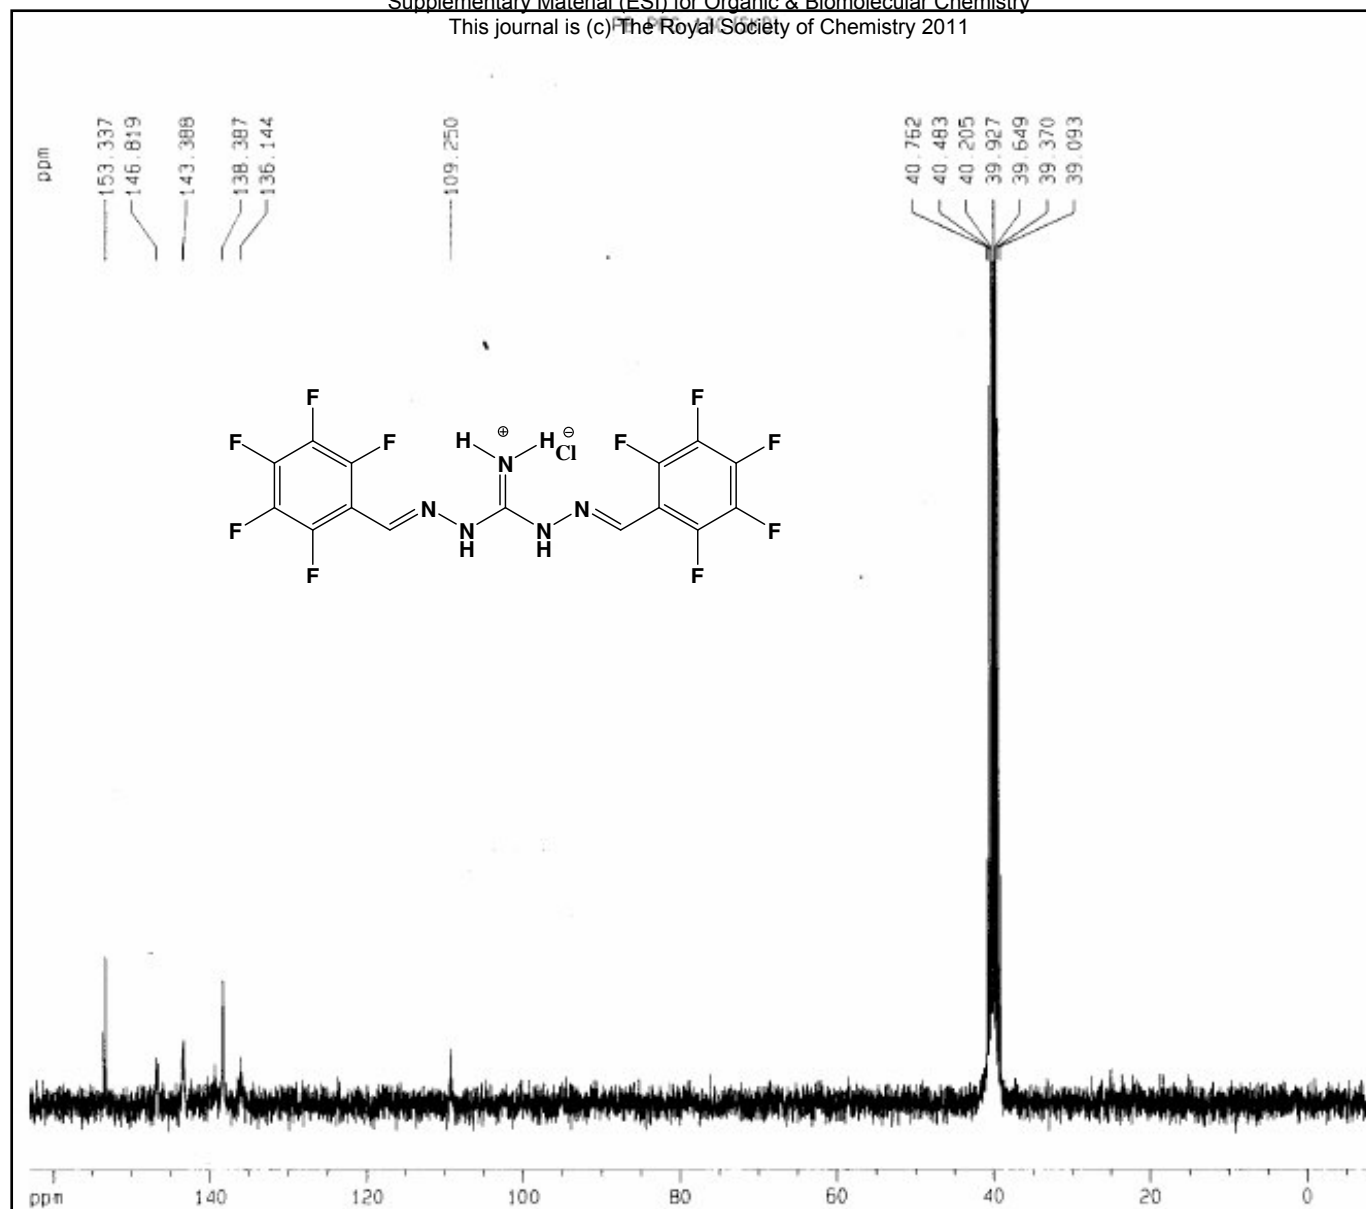

Figure S17.  $^{13}\text{C}$  NMR spectrum of S6 in DMSO- $d_6$ .

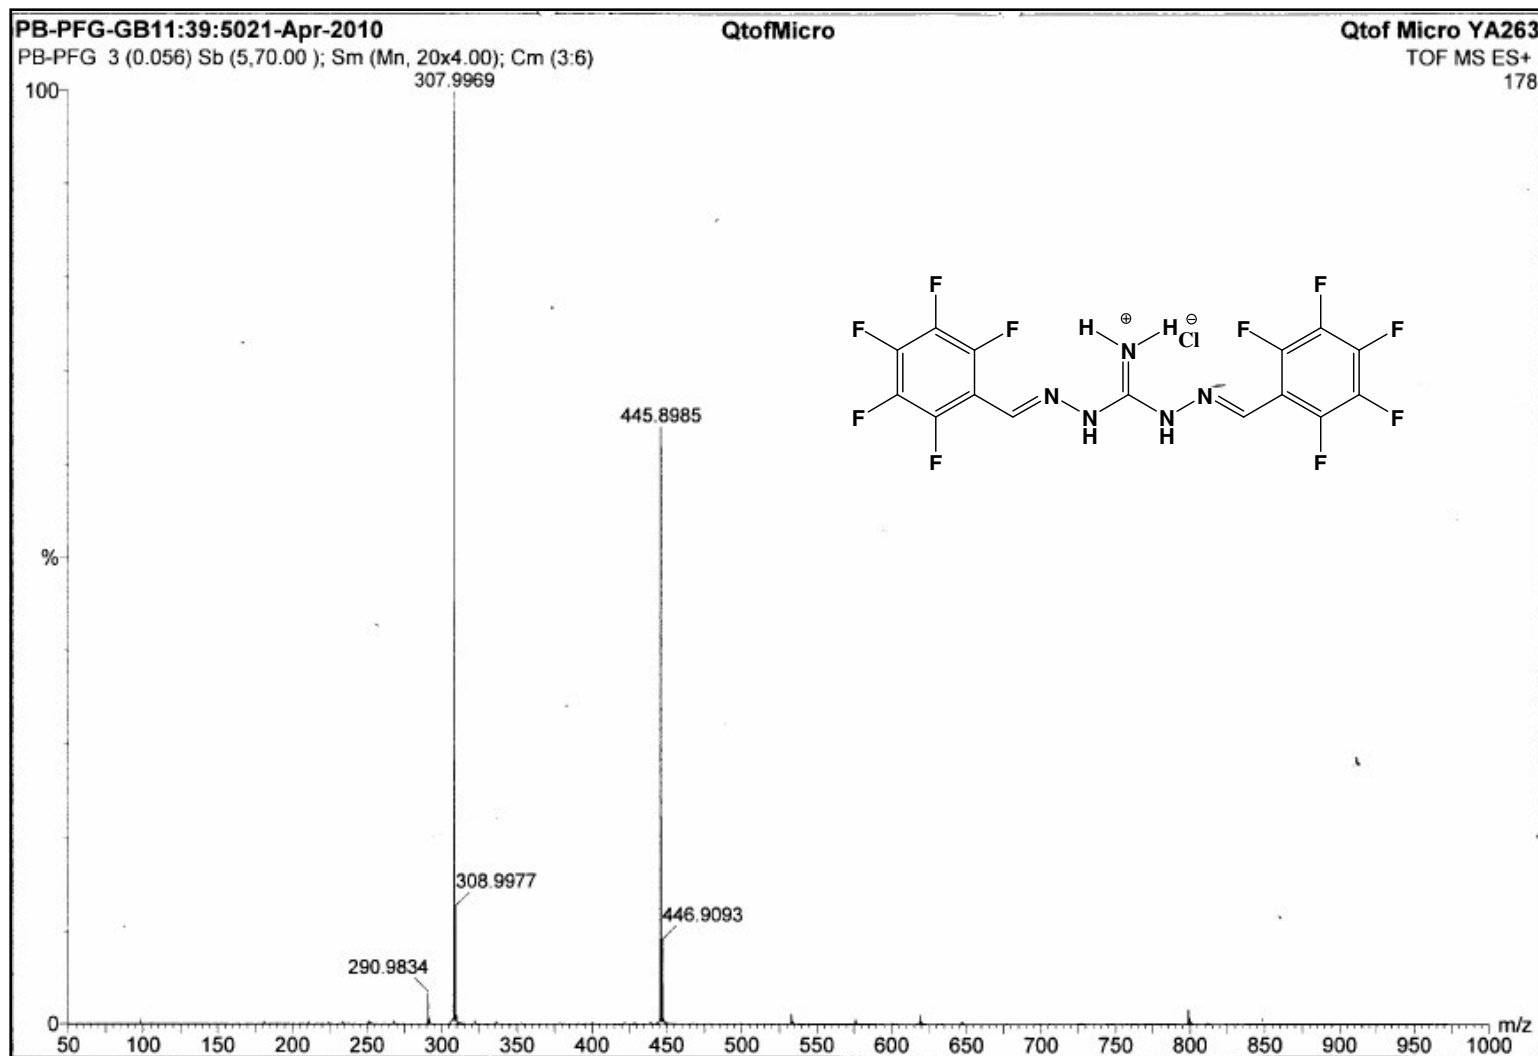

Figure S18. HRMS spectrum of S6.

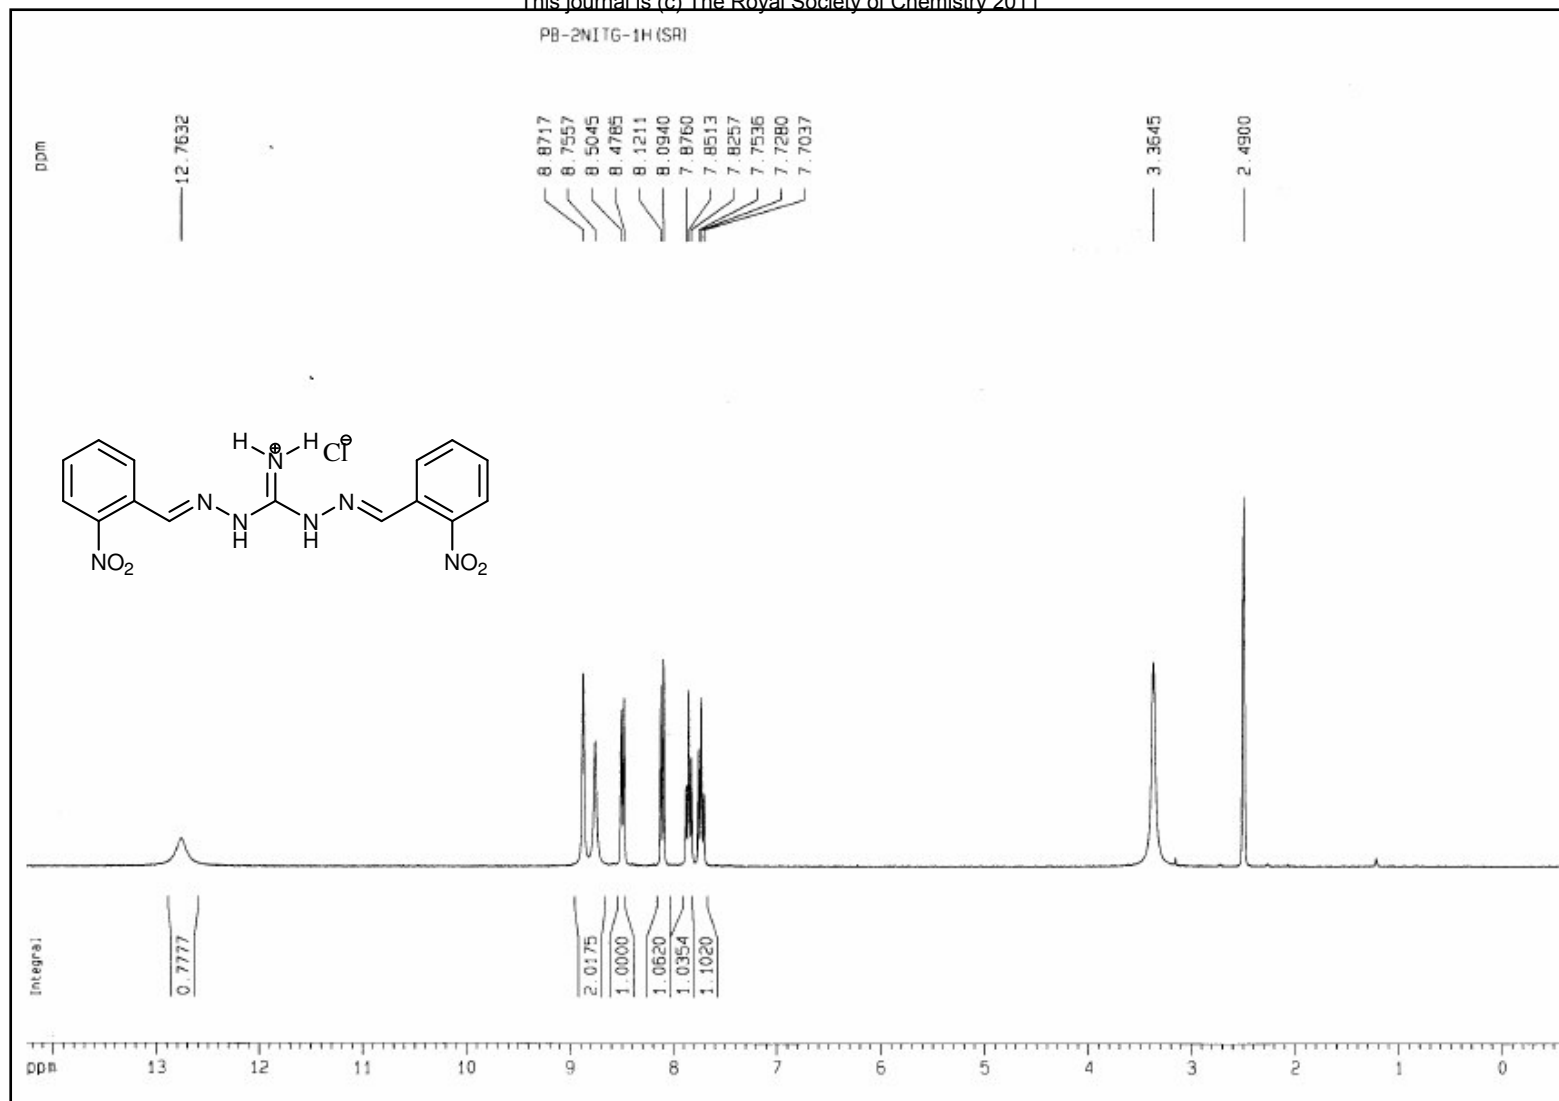

Figure S19.  $^1\text{H}$  NMR spectrum of S7 in DMSO- $d_6$ .



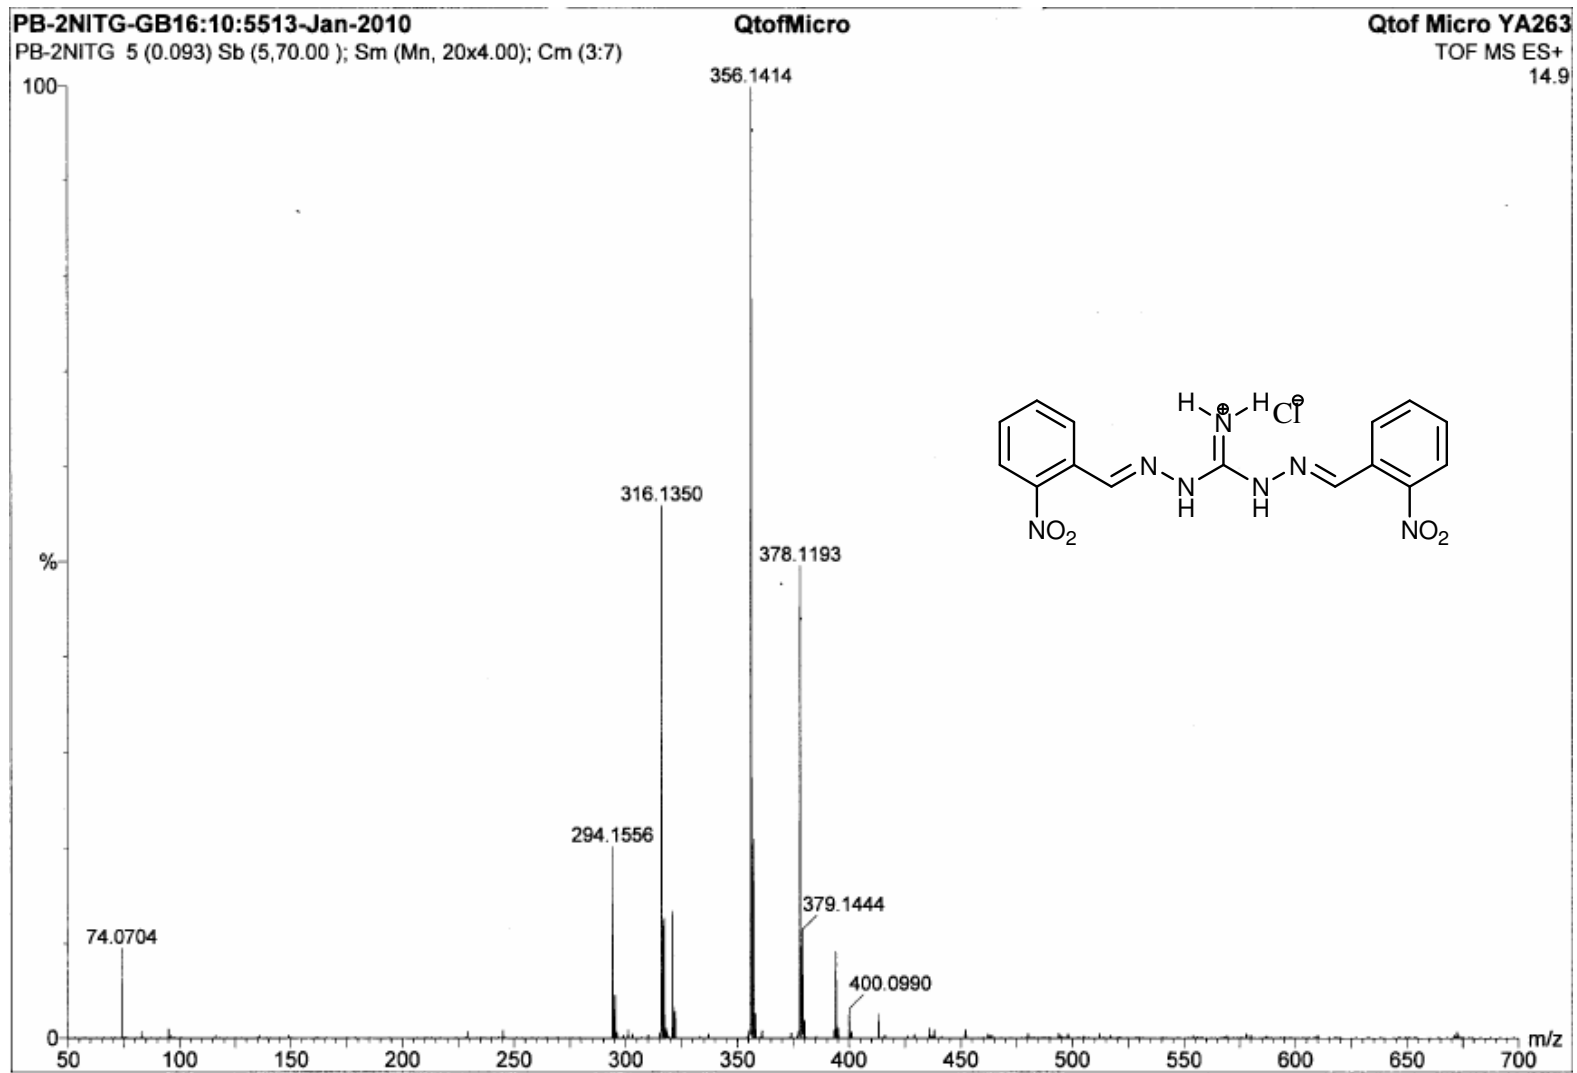

**Figure S21.** HRMS spectrum of S7.





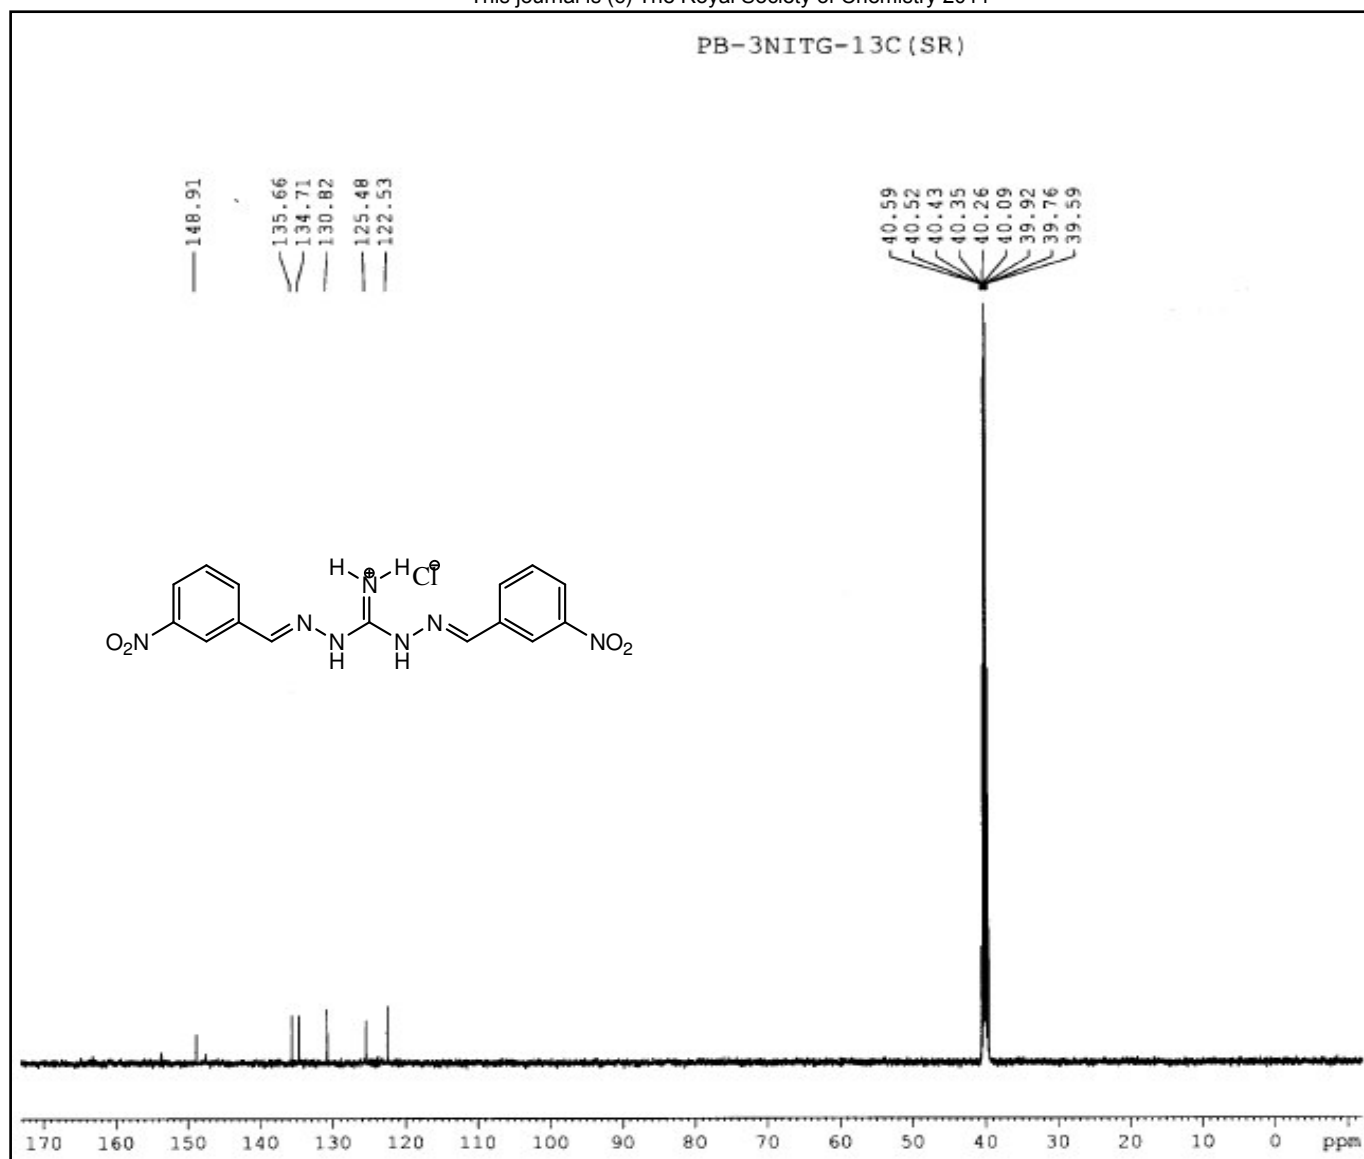

Figure S23.  $^{13}\text{C}$  NMR spectrum of S8 in DMSO- $d_6$ .

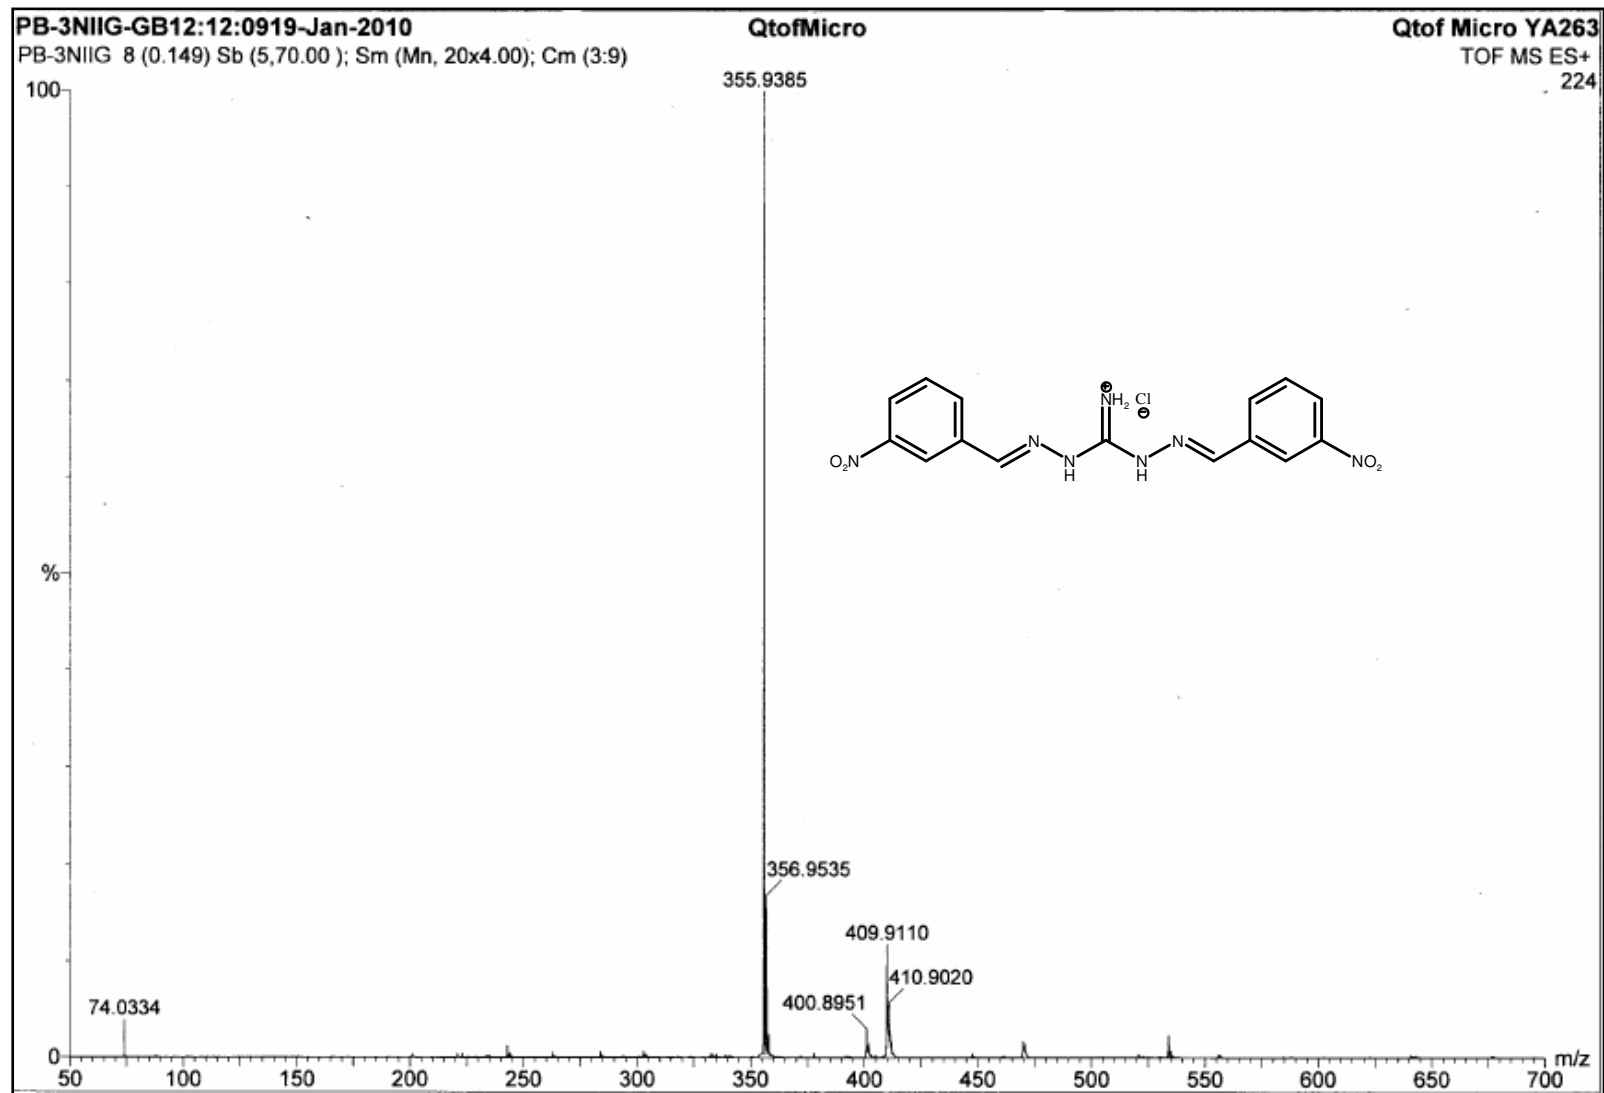

Figure S24. HRMS spectrum of S8.

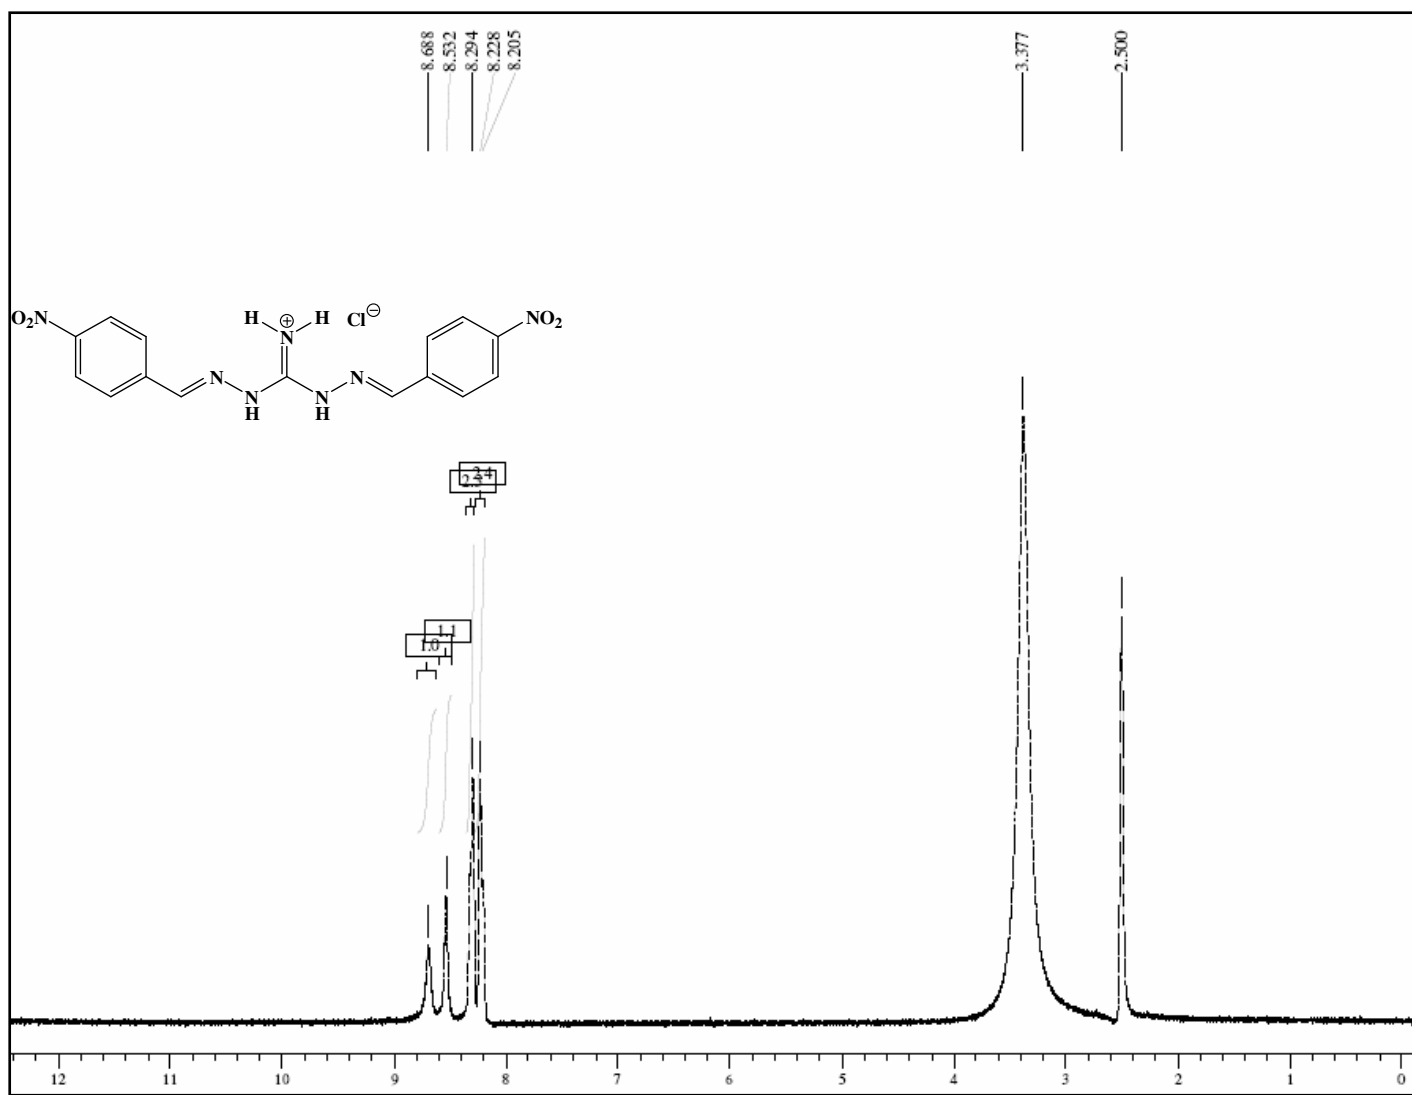

Figure S25.  $^1\text{H}$  NMR spectrum of **S9** in  $\text{DMSO-d}_6$ .

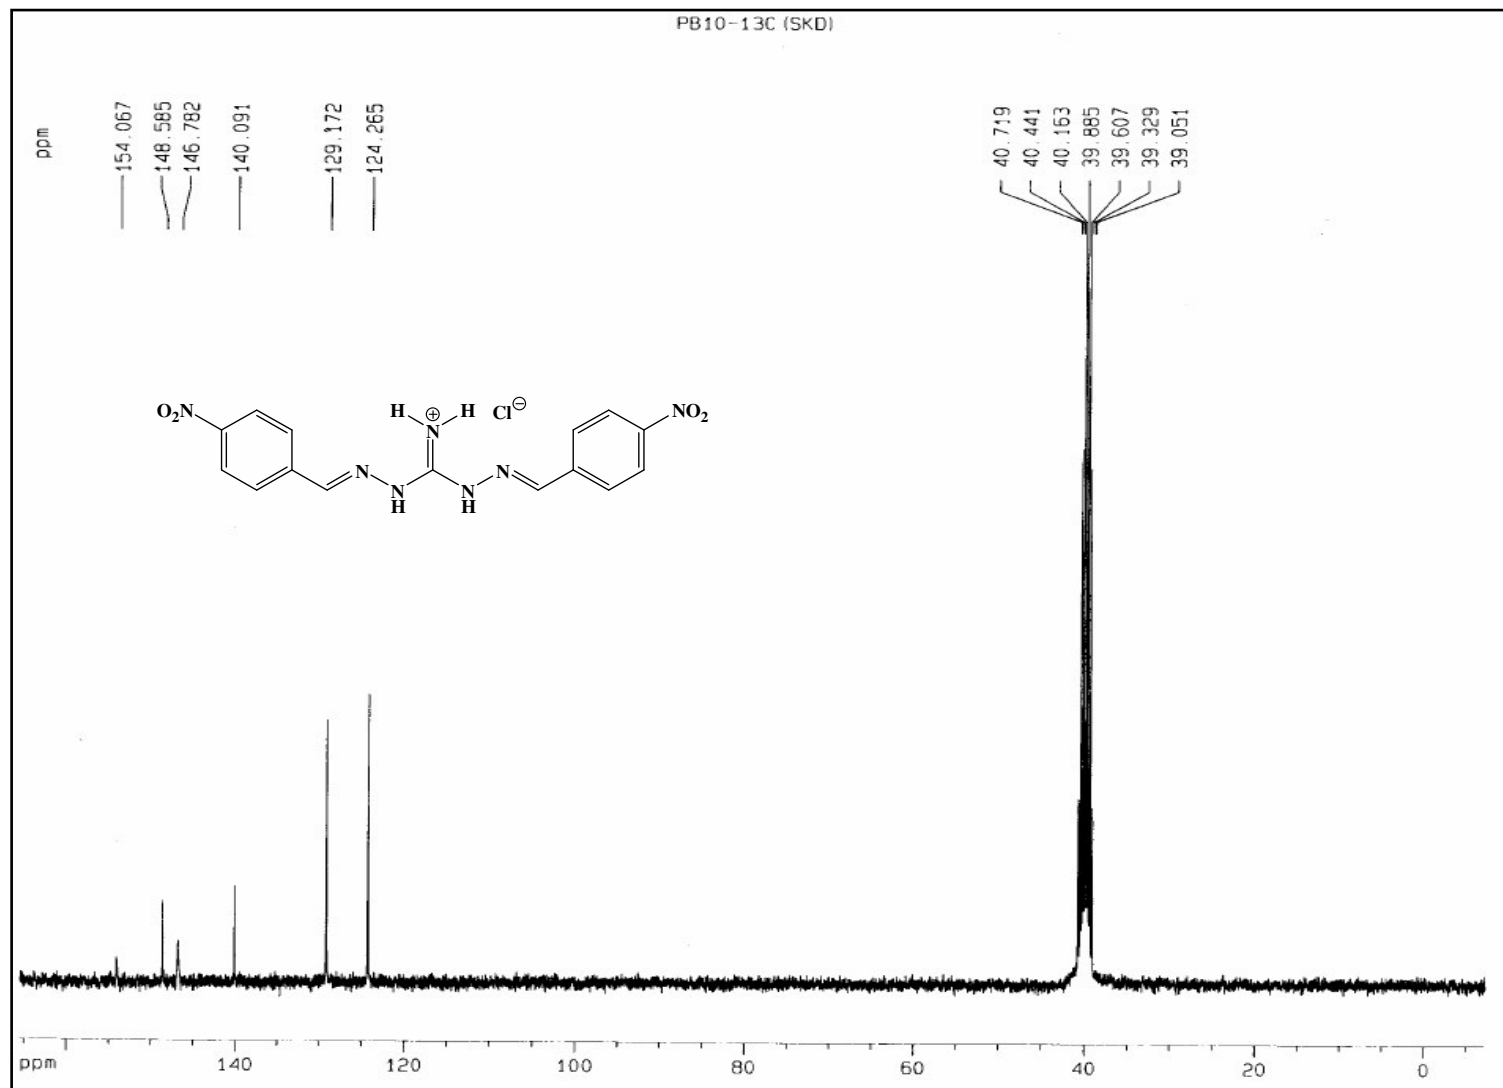

Figure S26.  $^{13}\text{C}$  NMR spectrum of **S9** in  $\text{DMSO-d}_6$ .

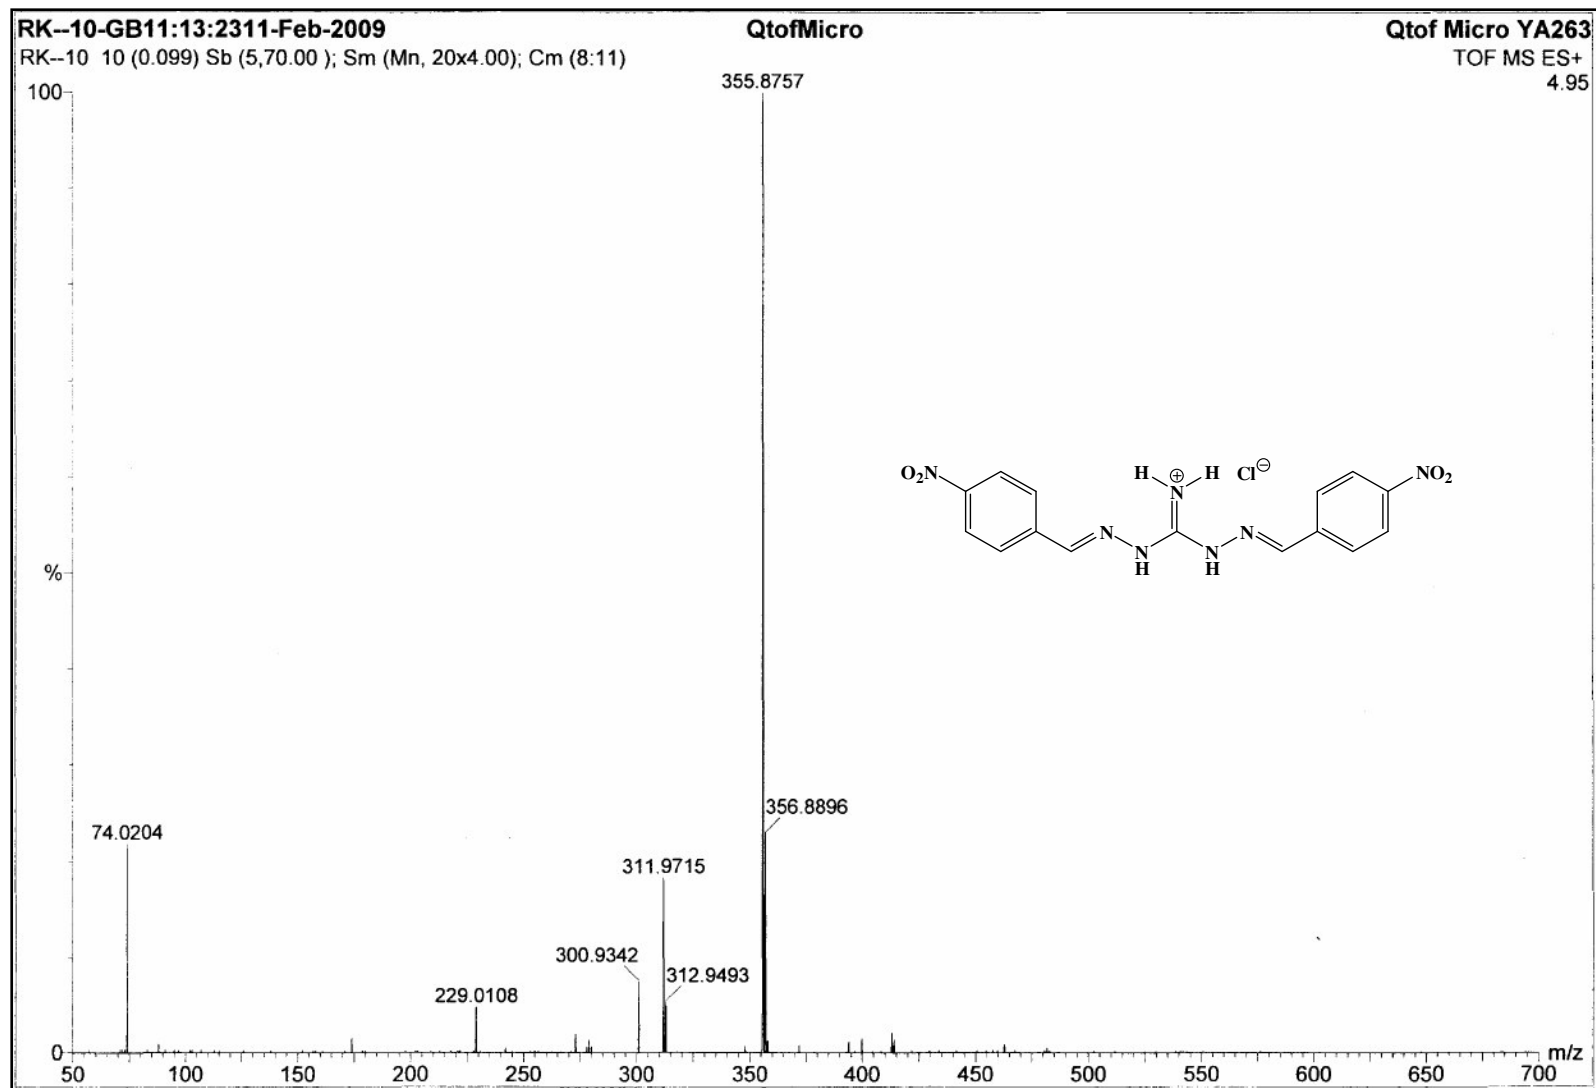

Figure S27. HRMS spectrum of S9.

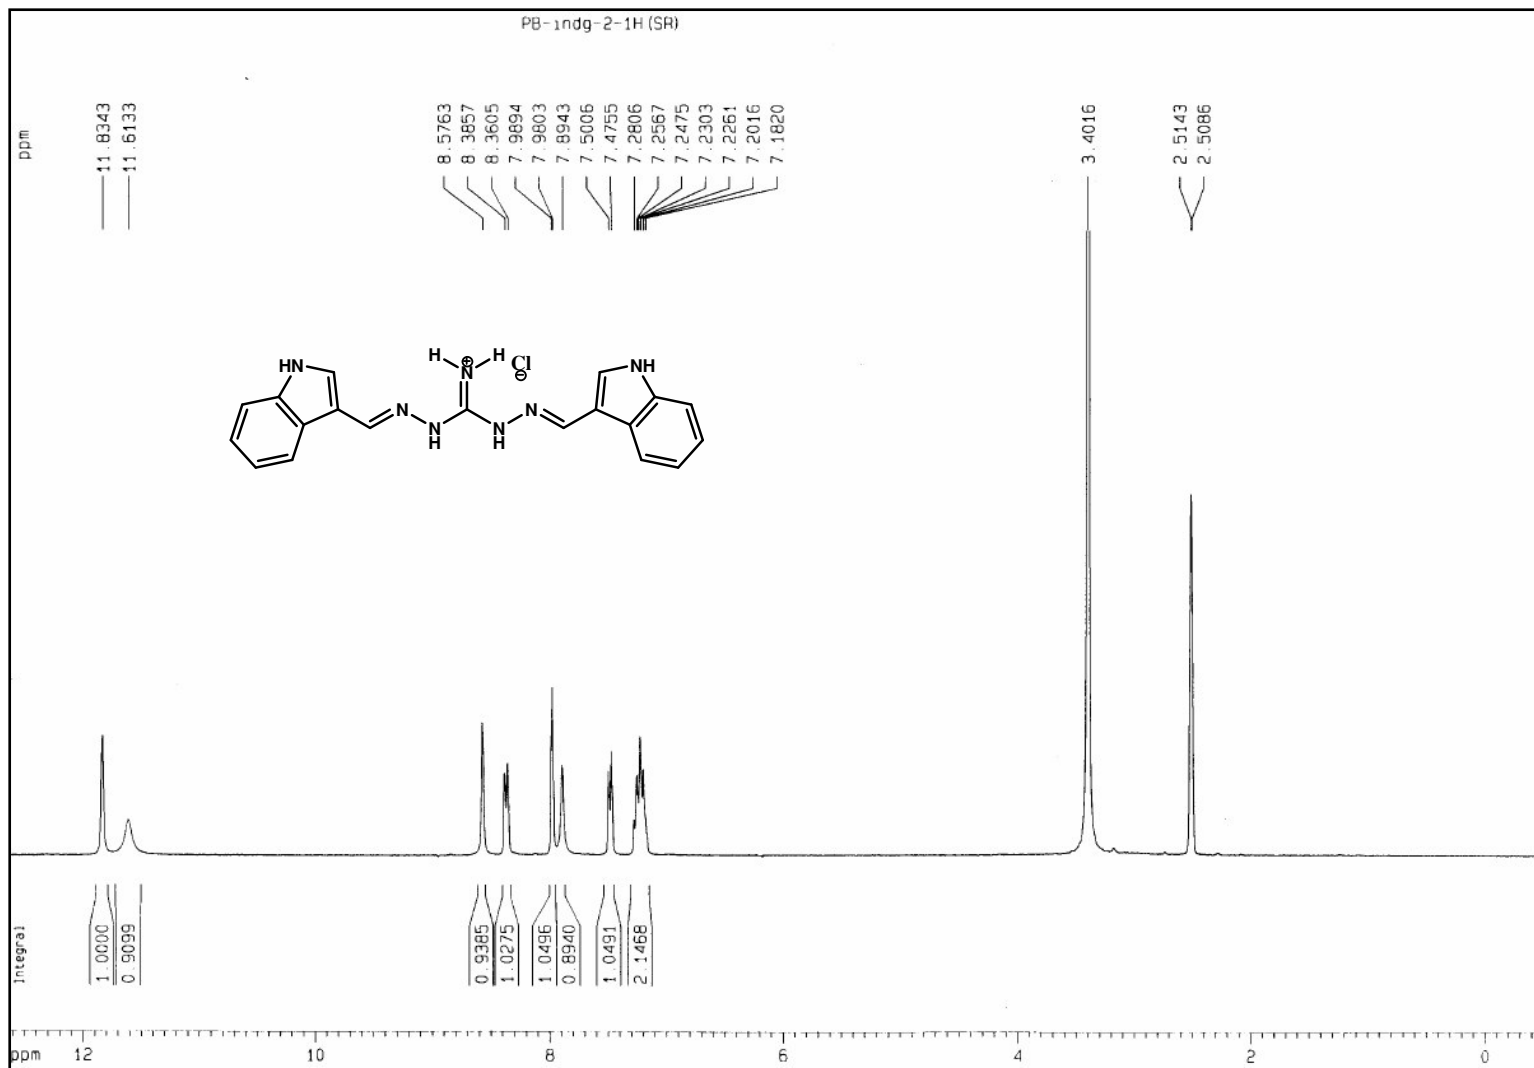

Figure S28.  $^1\text{H}$  NMR spectrum of **S10** in  $\text{DMSO-d}_6$ .

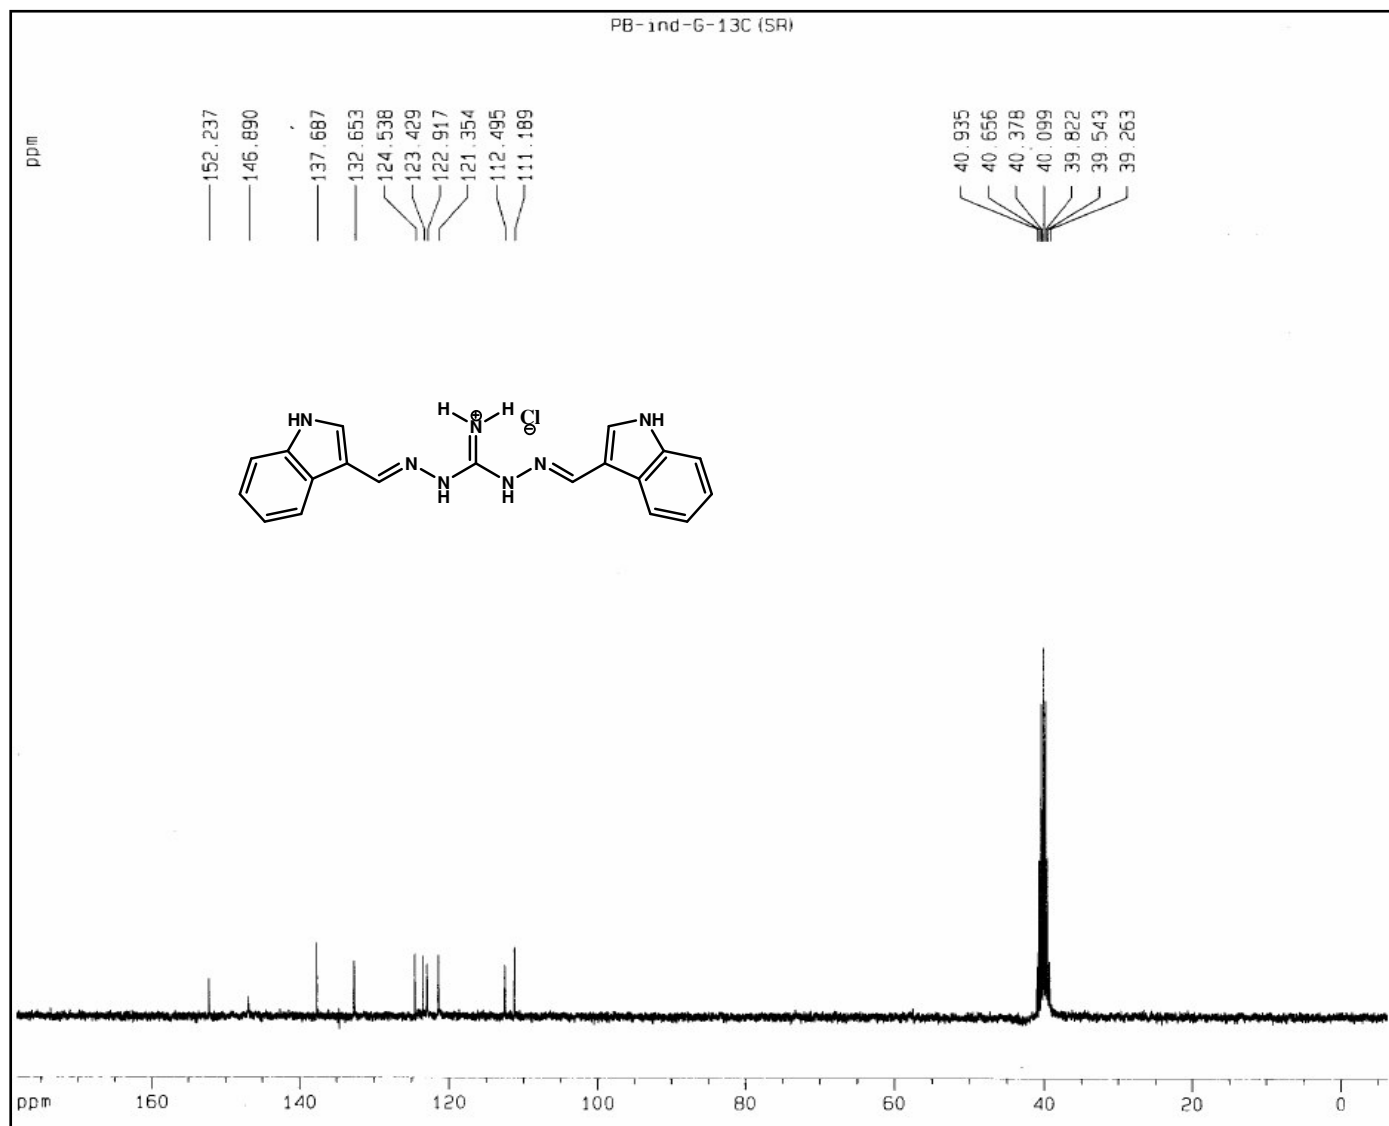

Figure S29.  $^{13}\text{C}$  NMR spectrum of S10 in DMSO- $d_6$ .



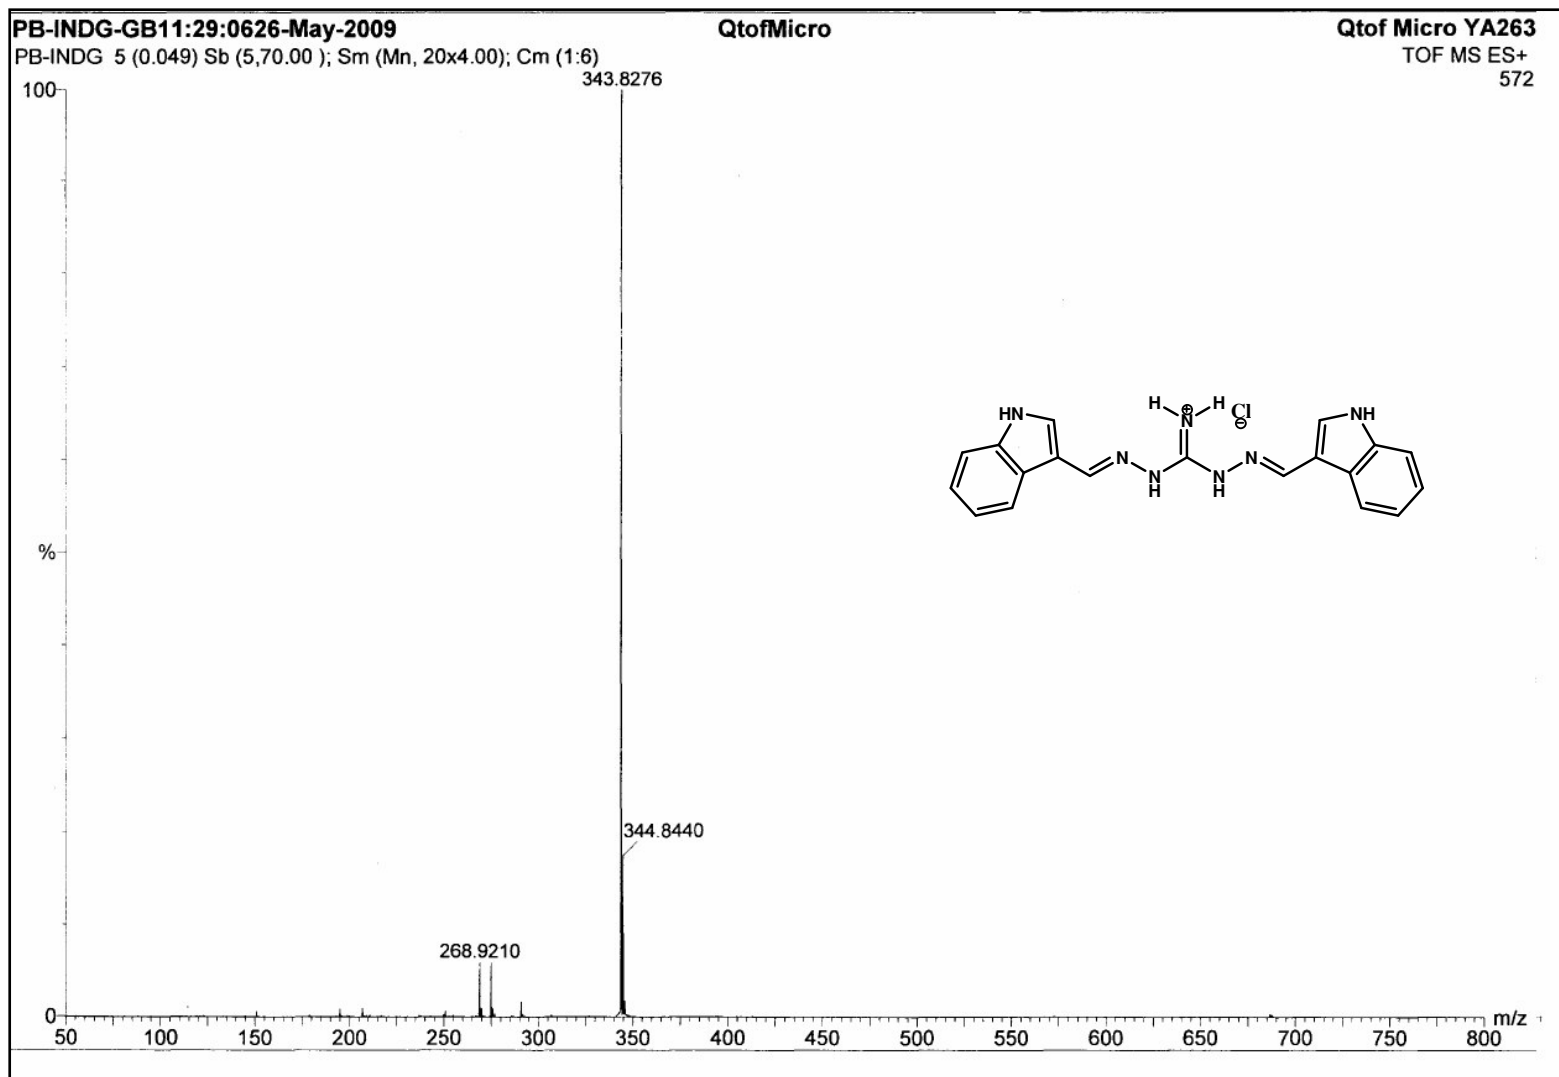

Figure S30. HRMS spectrum of S10.

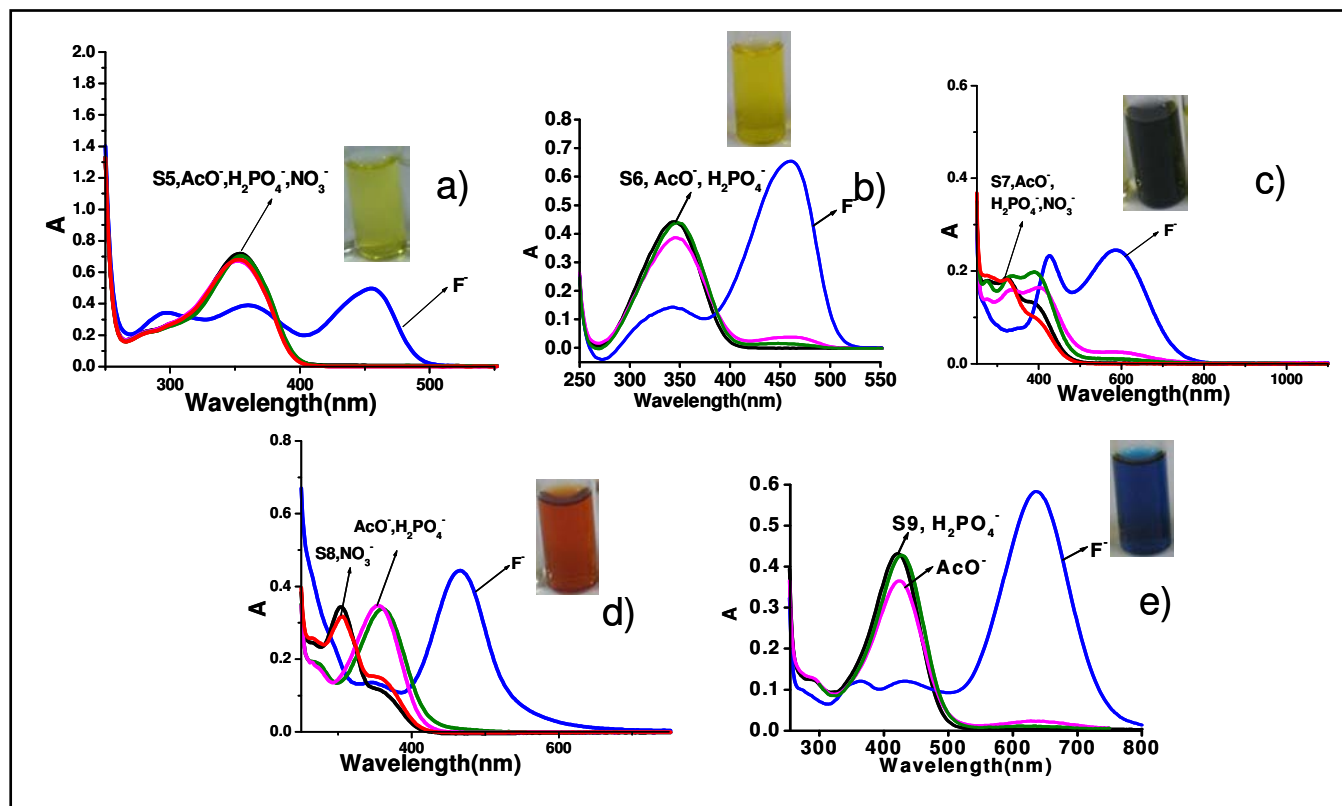

**Figure S31.** Changes in the UV-Vis absorption spectrum a)-e) of **S5-S9** ( $1.0 \times 10^{-4}$  M) in MeCN/DMF (9.6:0.4)(v/v) solution upon addition of 50 equiv of anions.

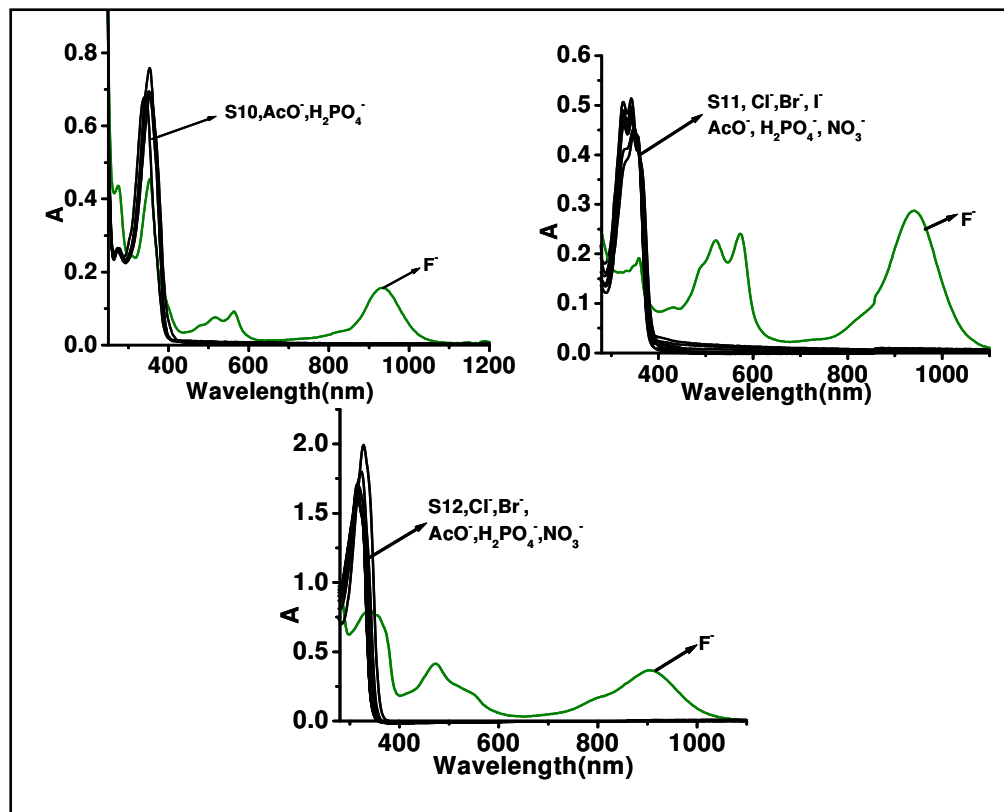

**Figure S32.** Changes in the UV/vis/NIR absorption spectrum of **S10-S12** ( $1.0 \times 10^{-5}$  M) in MeCN/DMF(9.6:0.4)(v/v) solution upon addition of 50 equiv of different anions.

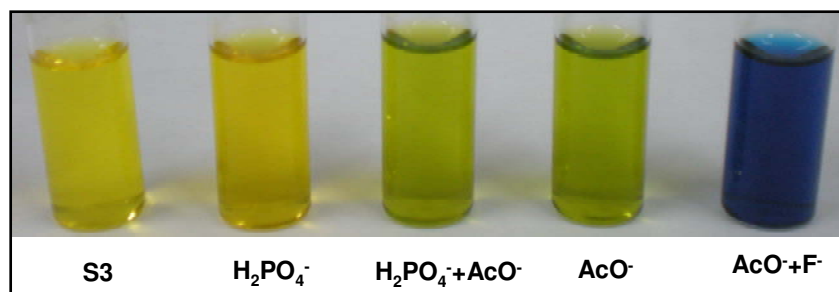

**Figure S33.** Selectivity study of **S9** ( $1 \times 10^{-4}$  M) in presence of different anions (30 equiv.).

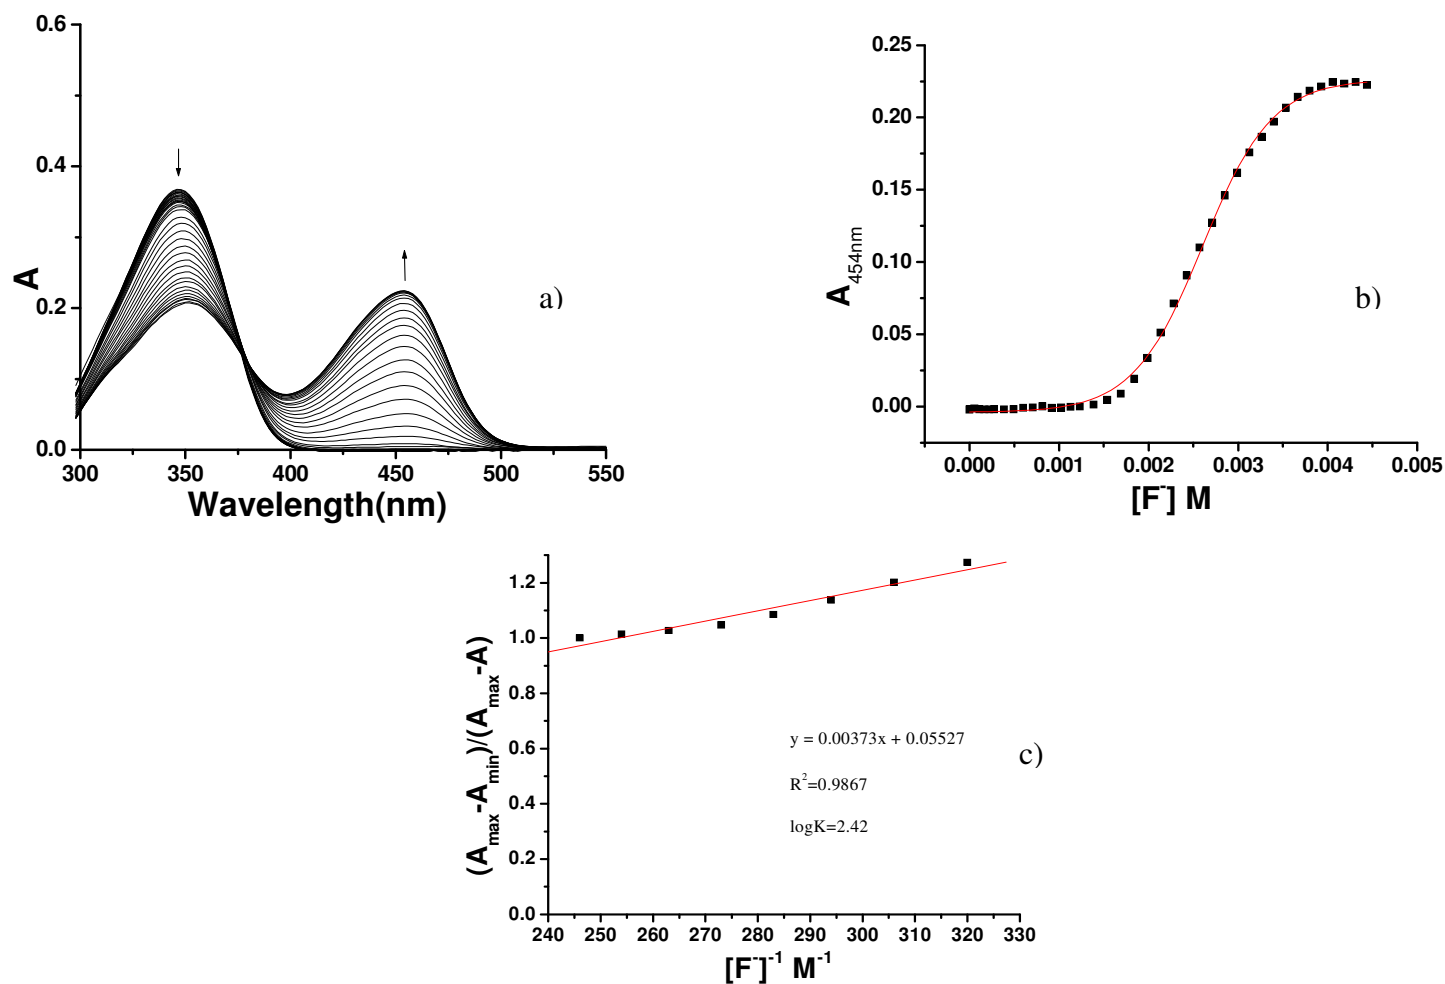

**Figure S34.** a) UV-Vis absorption changes of the titration of a  $1.0 \times 10^{-5}$  M solution of **S1** in MeCN/DMF (9.6:0.4)(v/v) with a standard solution of 0.01 (M) [Bu<sub>4</sub>N]F in MeCN. b) Absorbance changes for **S1** at 350 nm on addition of various concentration of [Bu<sub>4</sub>N]F. c) Benesi-Hildebrand plot.

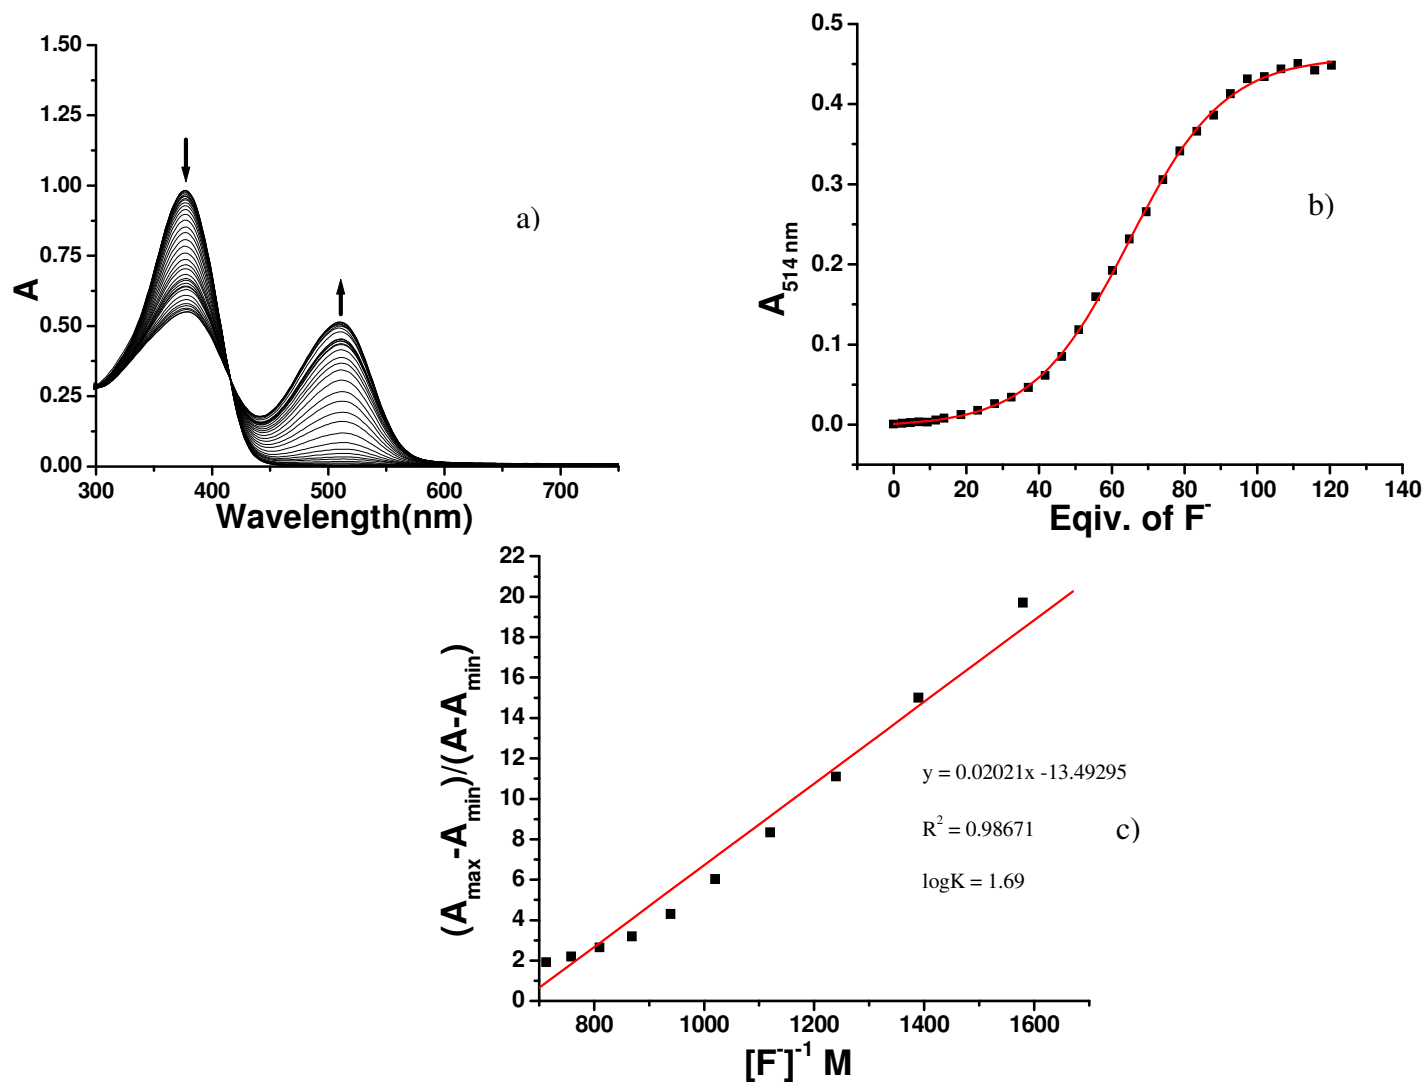

**Figure S35.** a) UV-Vis absorption changes of the titration of a  $1.0 \times 10^{-5}$  M solution of S2 in MeCN/DMF(9.6:0.4)(v/v) with a standard solution of 0.01(M) [Bu<sub>4</sub>N]F in MeCN. b) Absorbance changes for S2 at 514 nm on addition of various concentration of [Bu<sub>4</sub>N]F. c) Benesi-Hildebrand plot.

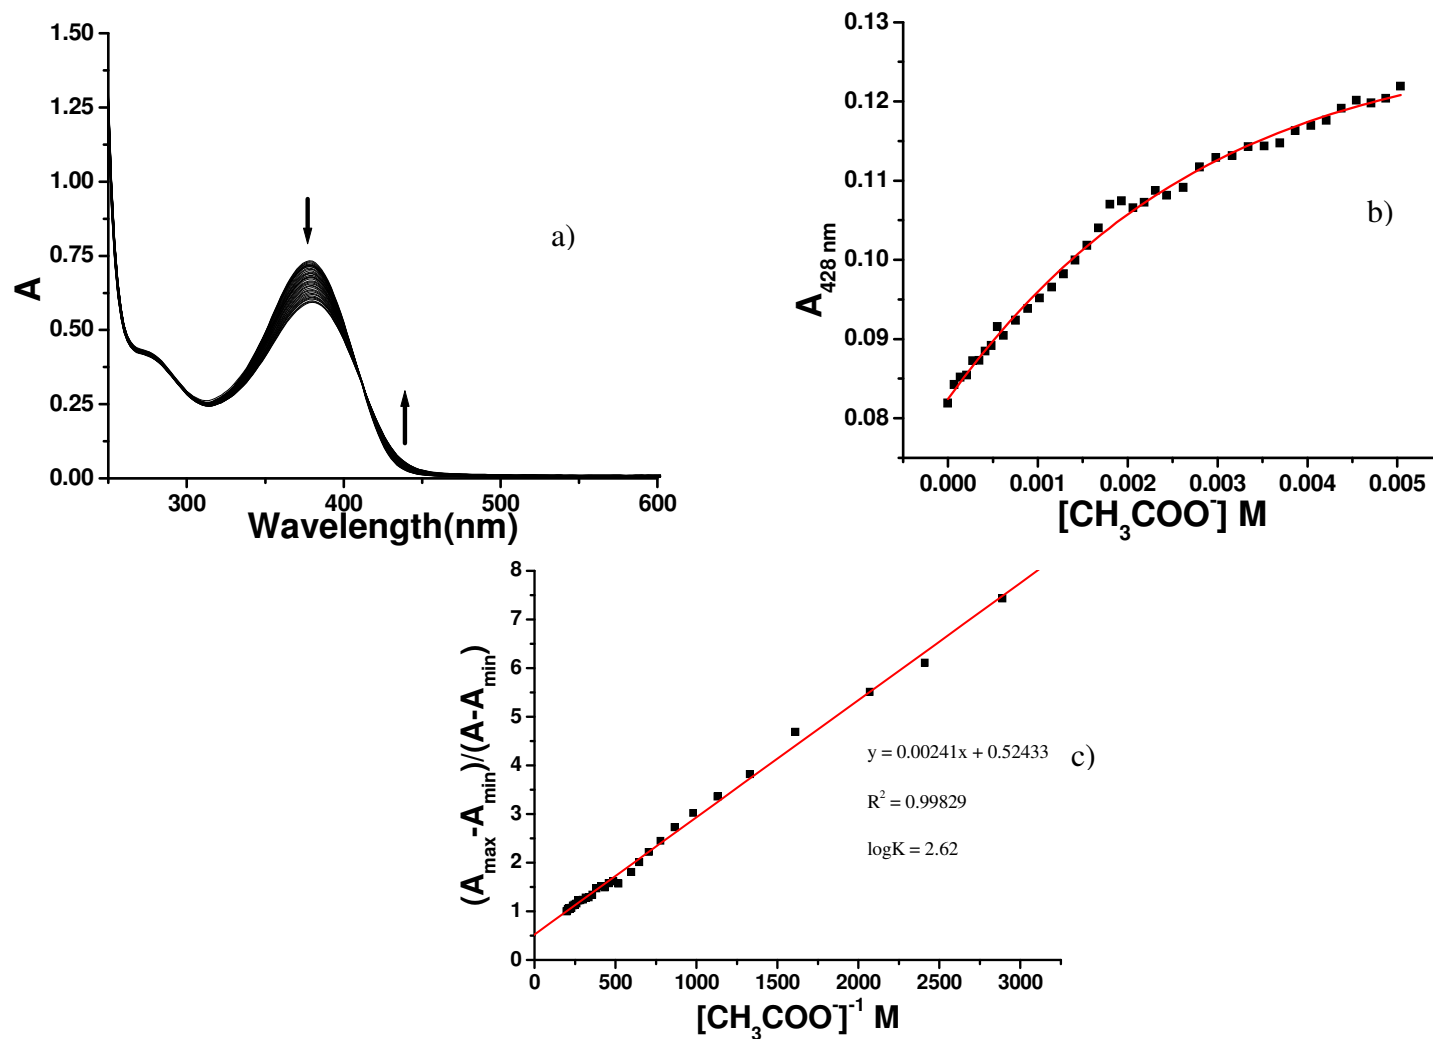

**Figure S36.** a) UV-Vis absorption changes of the titration of a 1.0 × 10<sup>-5</sup> M solution of S2 in MeCN/DMF(9.6:0.4)(v/v) with a standard solution of 0.01(M) [Bu<sub>4</sub>N]AcO in MeCN. b) Absorbance changes for S2 at 428 nm on addition of various concentration of [Bu<sub>4</sub>N]AcO. c) Benesi-Hildebrand plot.

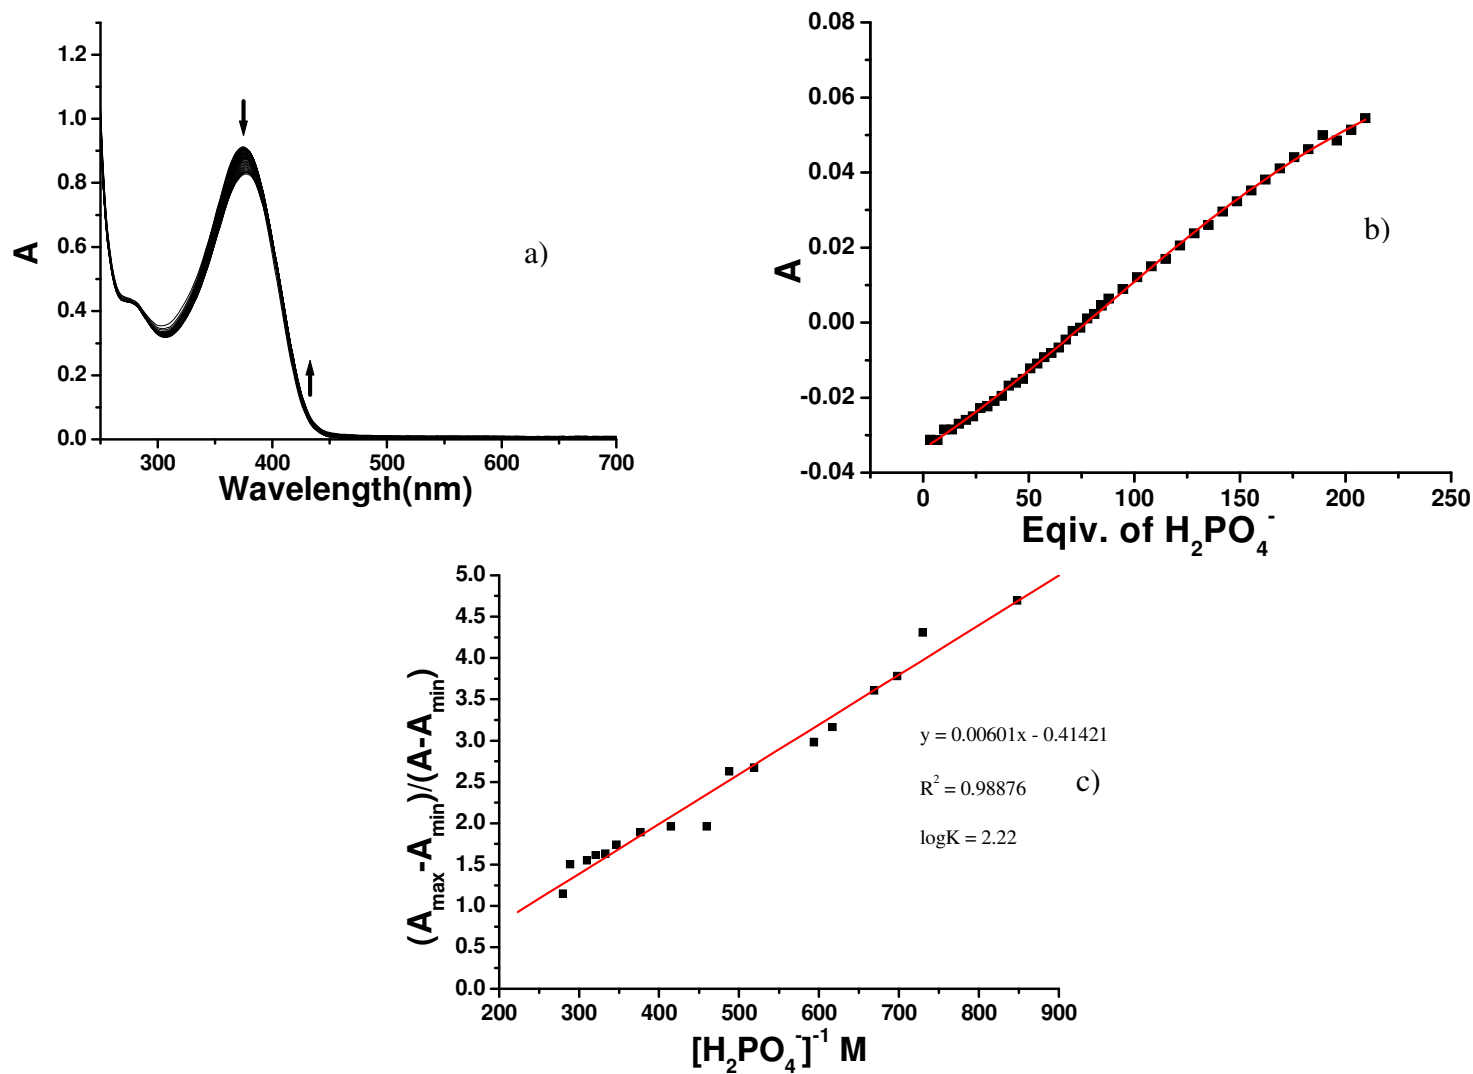

**Figure S37.** a) UV-Vis absorption changes of the titration of a  $1.0 \times 10^{-5}$  M solution of **S2** in MeCN/DMF (9.6:0.4)(v/v) with a standard solution of 0.01(M) [Bu<sub>4</sub>N]H<sub>2</sub>PO<sub>4</sub> in MeCN. b) Absorbance changes for **S2** at 430 nm on addition of various concentration of [Bu<sub>4</sub>N] H<sub>2</sub>PO<sub>4</sub>. c) Benesi-Hildebrand plot.



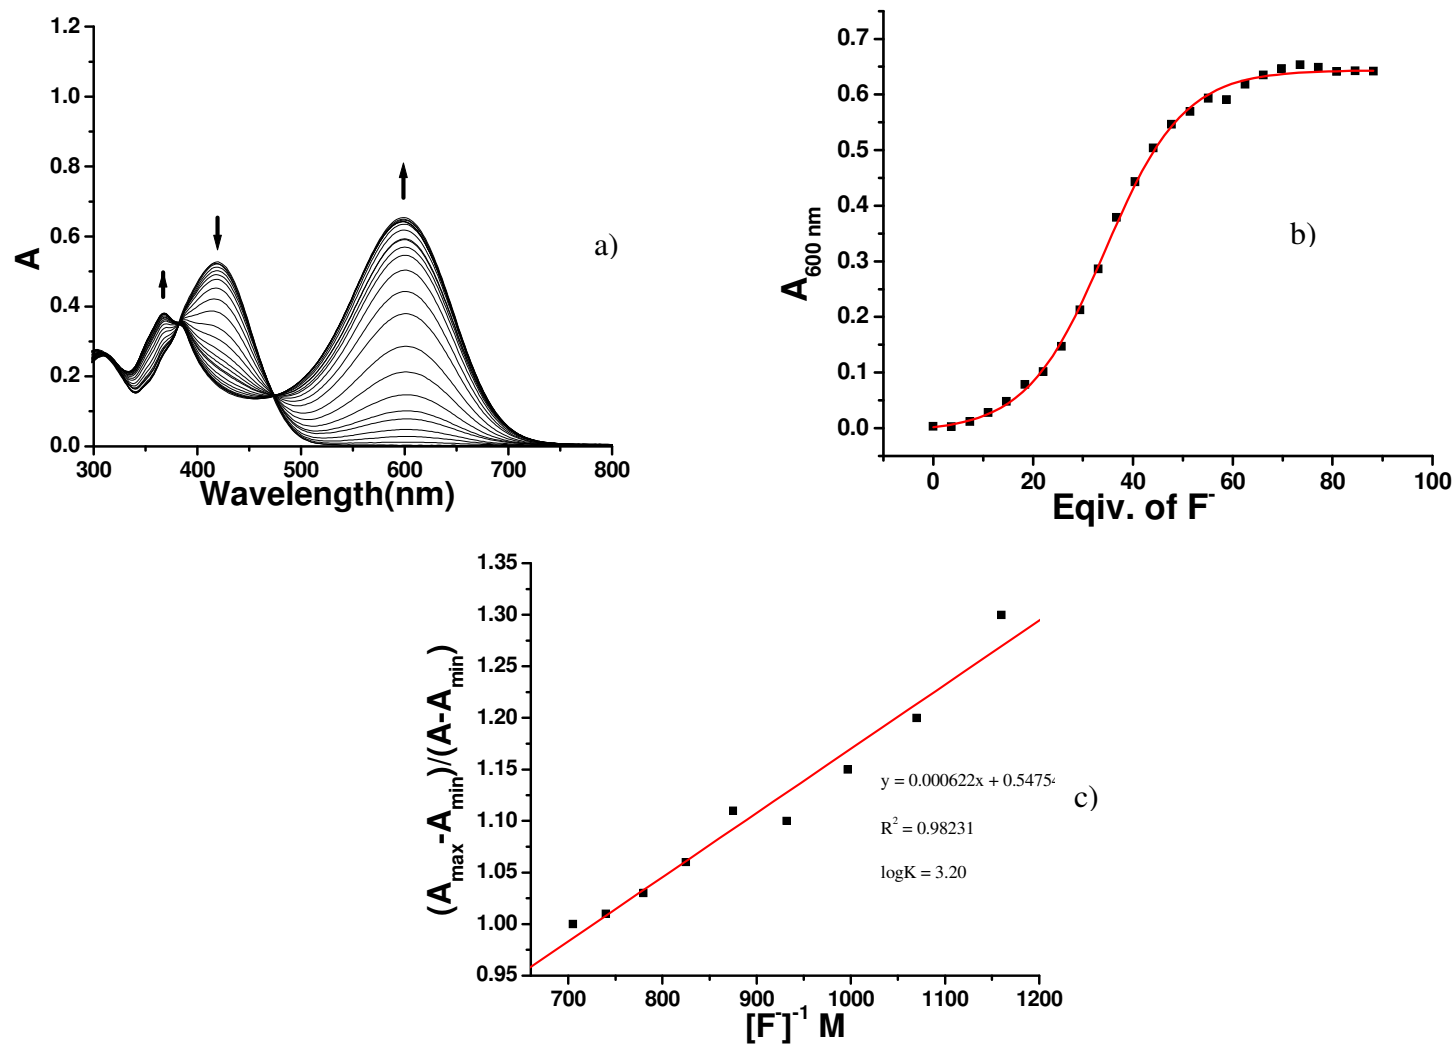

**Figure S38.** a) UV-Vis absorption changes of the titration of a  $1.0 \times 10^{-5} \text{ M}$  solution of **S3** in in MeCN/DMF(9.6:0.4)(v/v) with a standard solution of 0.01(M) [Bu<sub>4</sub>N]F in MeCN. b) Absorbance changes for **S3** at 600 nm on addition of various concentration of [Bu<sub>4</sub>N]F. c) Benesi-Hildebrand plot.

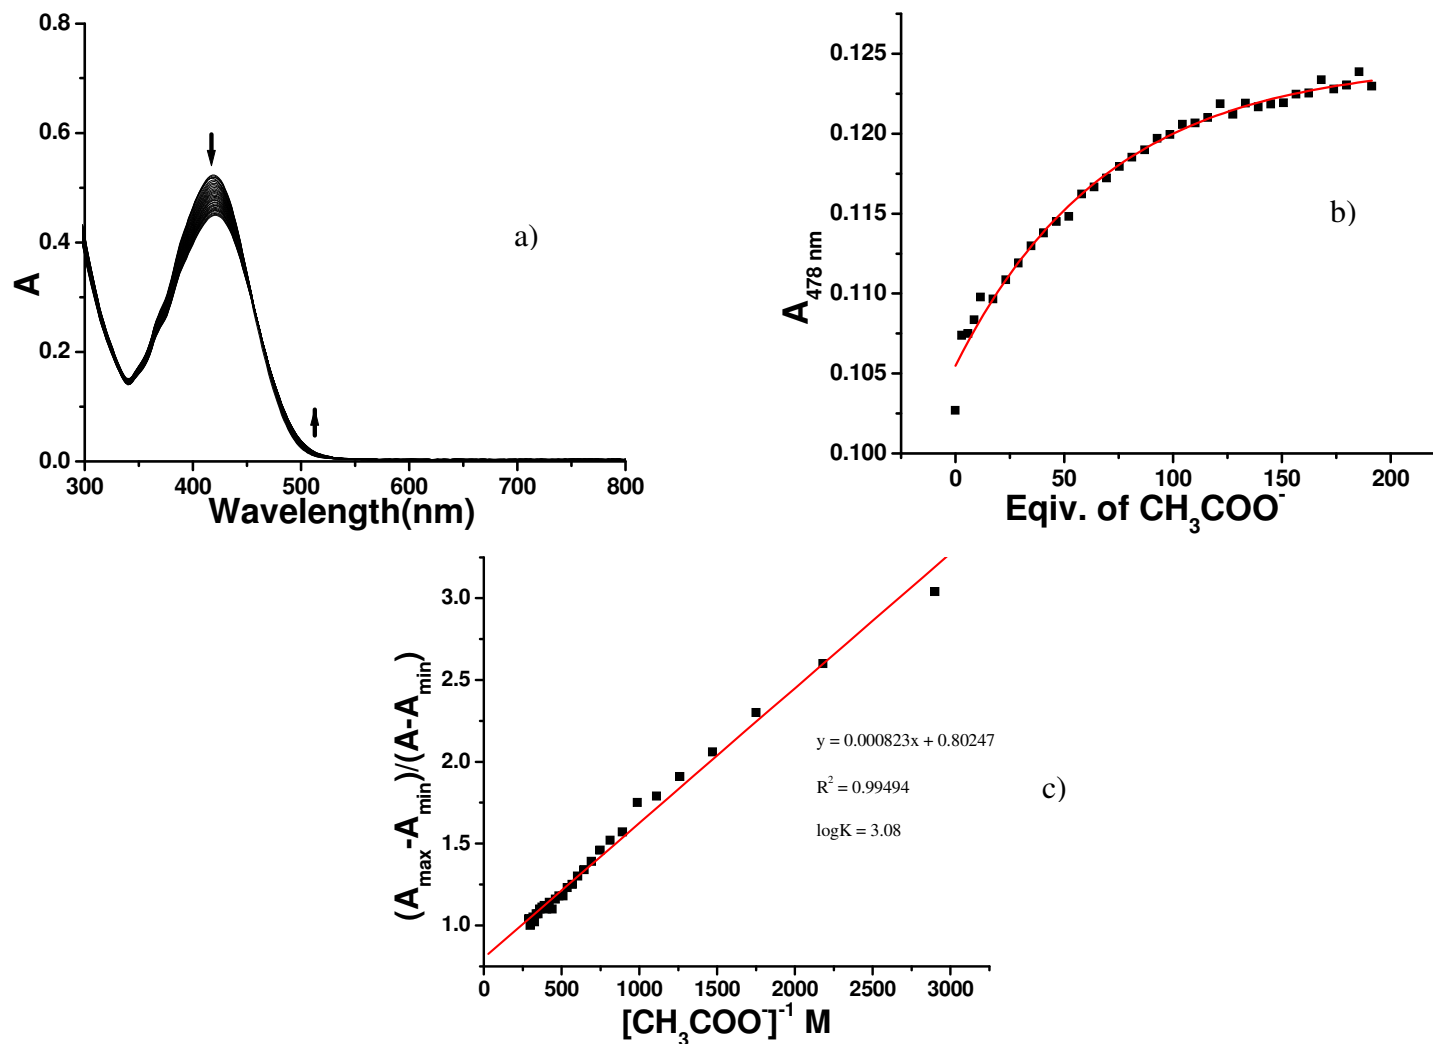

**Figure S39.** a) UV-Vis absorption changes of the titration of a  $1.0 \times 10^{-5}$  M solution of **S3** in MeCN/DMF (9.6:0.4)(v/v) with a standard solution of 0.01(M) [Bu<sub>4</sub>N]AcO in MeCN. b) Absorbance changes for **S3** at 478 nm on addition of various concentration of [Bu<sub>4</sub>N]AcO. c) Benesi-Hildebrand plot.

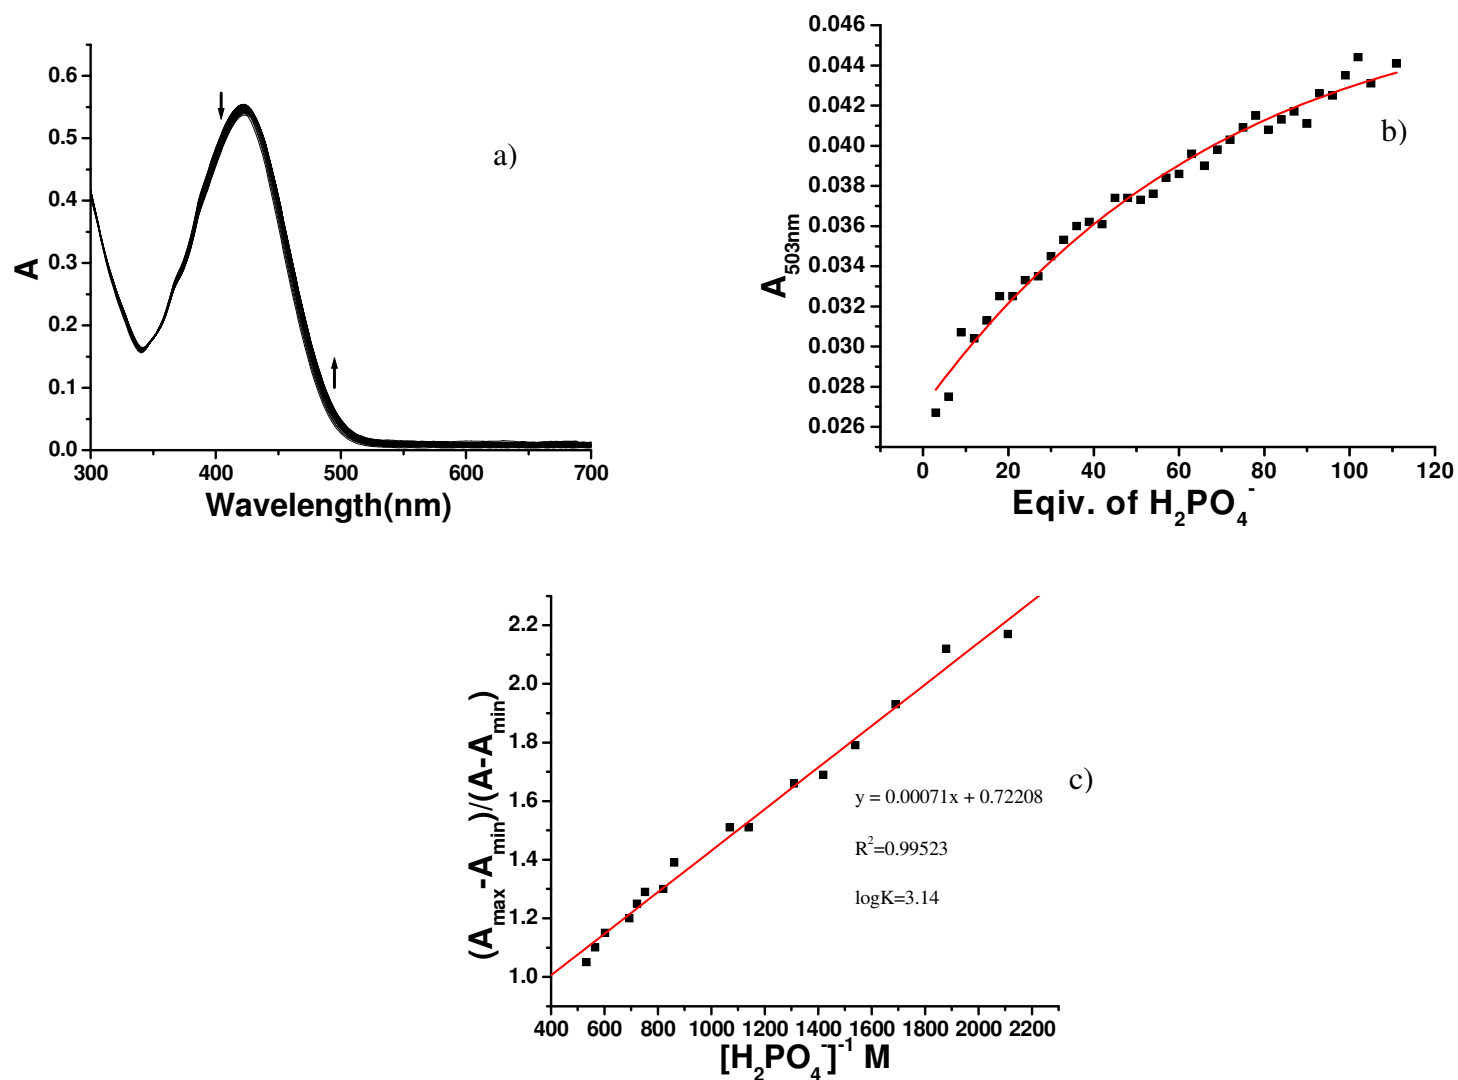

**Figure S40.** a) UV-Vis absorption changes of the titration of a  $1.0 \times 10^{-5}$  M solution of **S3** in MeCN/DMF(9.6:0.4)(v/v) with a standard solution of 0.01(M)  $[\text{Bu}_4\text{N}]\text{H}_2\text{PO}_4$  in MeCN. b) Absorbance changes for **S3** at 503 nm on addition of various concentration of  $[\text{Bu}_4\text{N}]\text{H}_2\text{PO}_4$ . c) Benesi-Hildebrand plot.

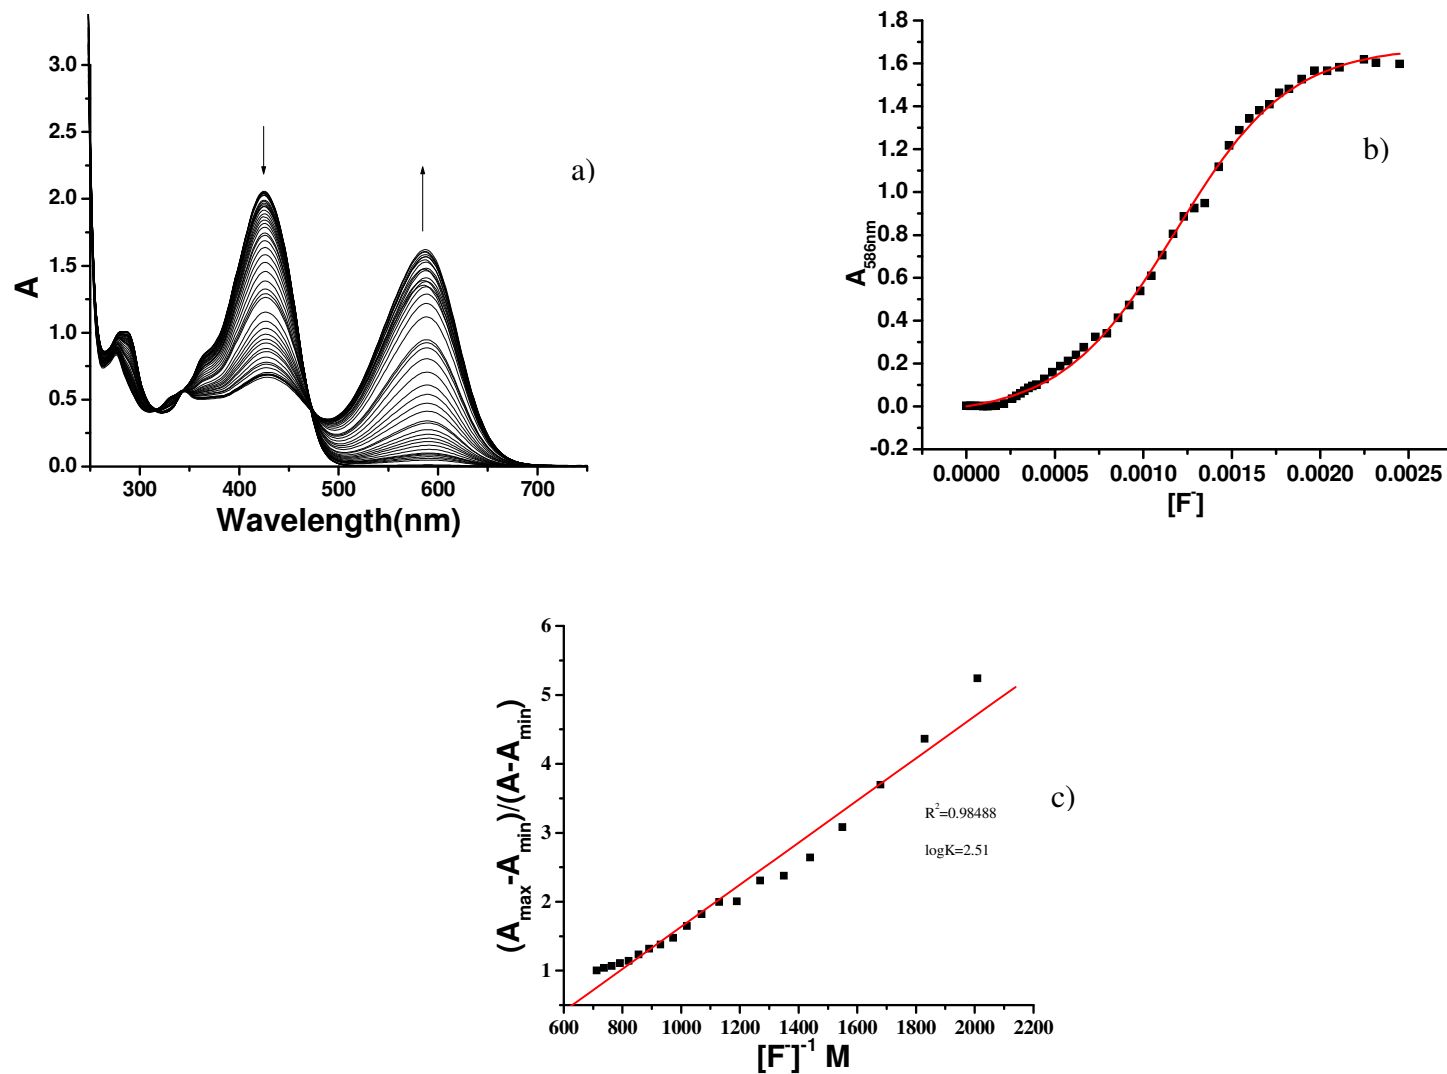

**Figure S41.** a) UV-Vis absorption changes of the titration of a  $1.0 \times 10^{-5}$  M solution of S4 in MeCN/DMF(9.6:0.4)(v/v) with a standard solution of 0.01 (M) [Bu<sub>4</sub>N]F in MeCN. b) Absorbance changes for S4 at 586 nm on addition of various concentration of [Bu<sub>4</sub>N]F. c) Benesi-Hildebrand plot.

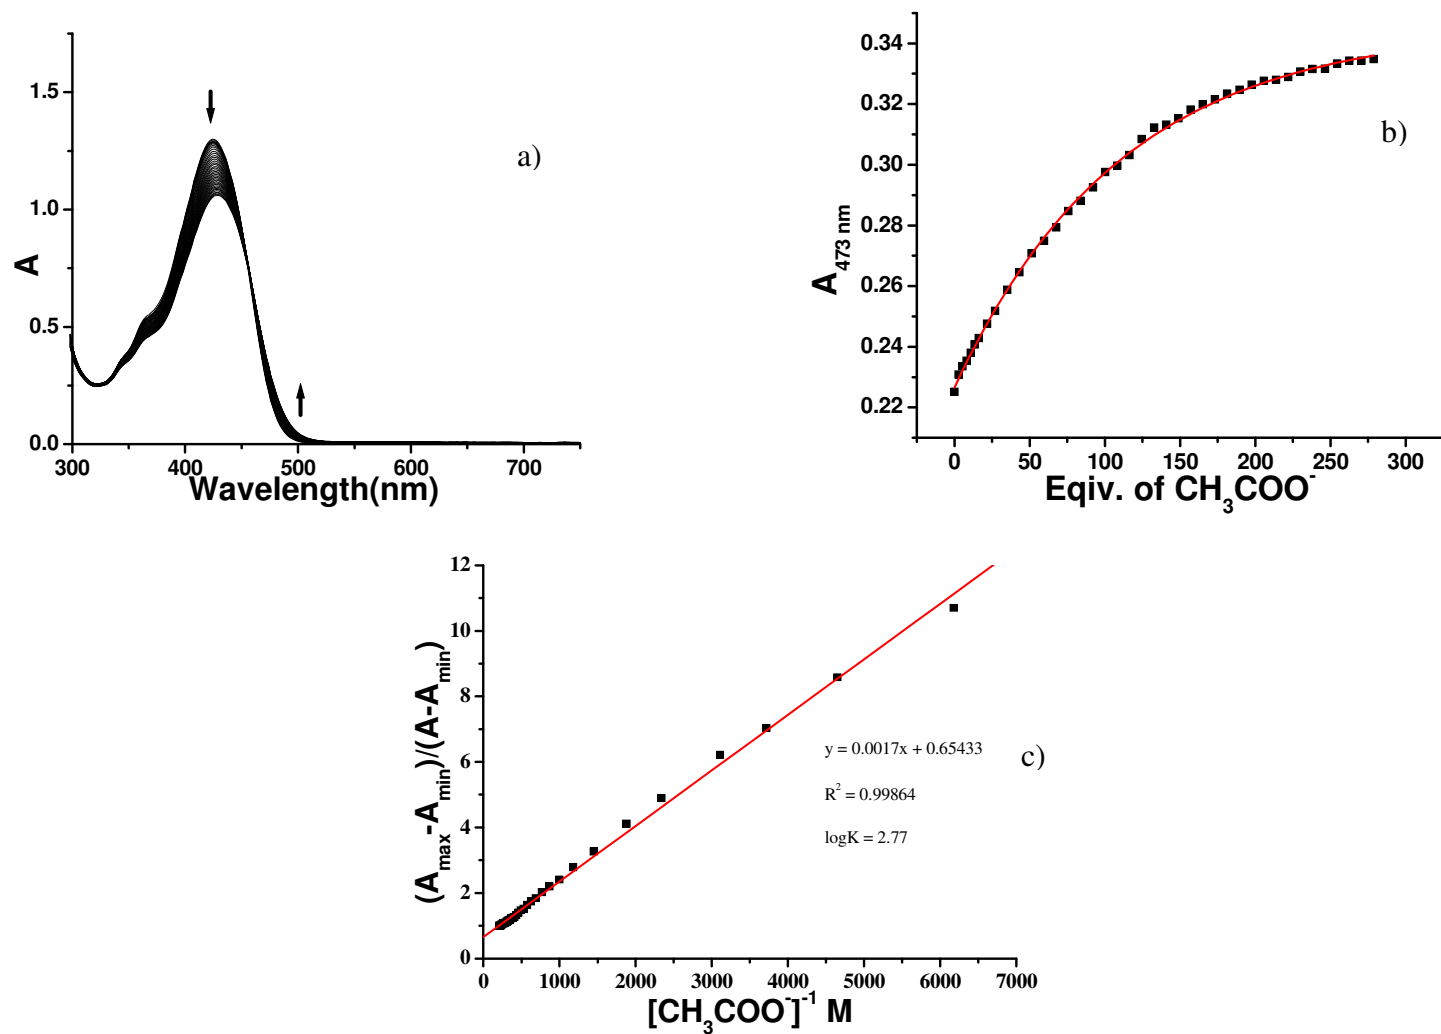

**Figure S42.** a) UV-Vis absorption changes of the titration of a  $1.0 \times 10^{-5}$  M solution of S4 in MeCN/DMF (9.6:0.4)(v/v) with a standard solution of 0.01 (M) [Bu<sub>4</sub>N]AcO in MeCN. b) Absorbance changes for S4 at 473 nm on addition of various concentration of [Bu<sub>4</sub>N]AcO. c) Benesi-Hildebrand plot.

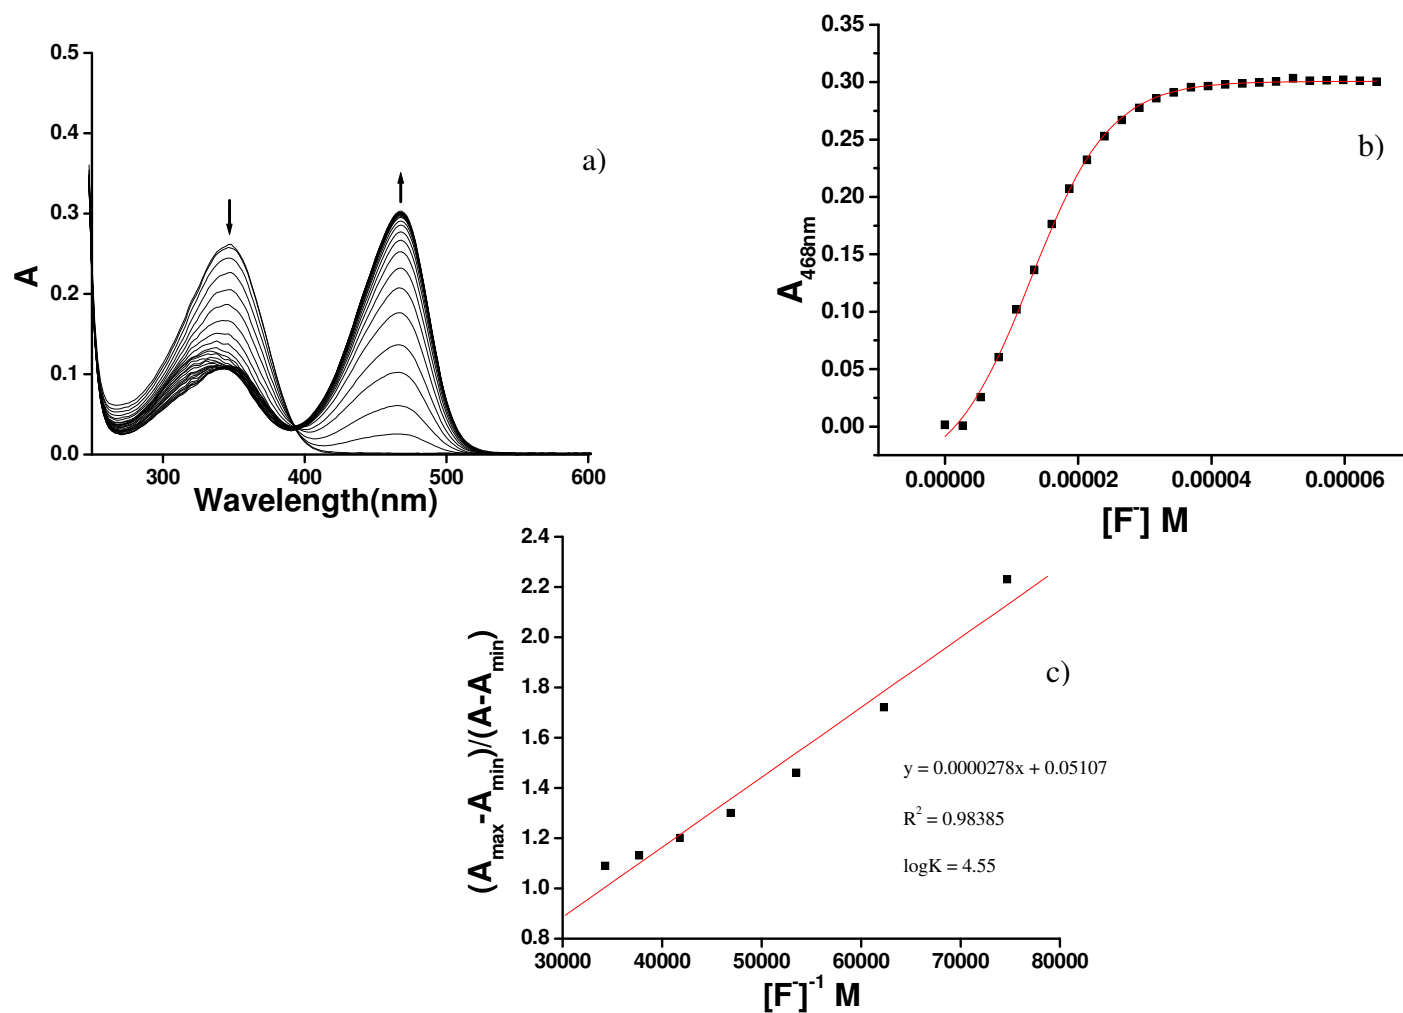

**Figure S43.** a) UV-Vis absorption changes of the titration of a  $1.0 \times 10^{-5}$  M solution of **S6** in MeCN/DMF (9.6:0.4)(v/v) with a standard solution of 0.01 (M) [Bu<sub>4</sub>N]F in MeCN. b) Absorbance changes for **S6** at 468 nm on addition of various concentration of [Bu<sub>4</sub>N]F. c) Benesi-Hildebrand plot.

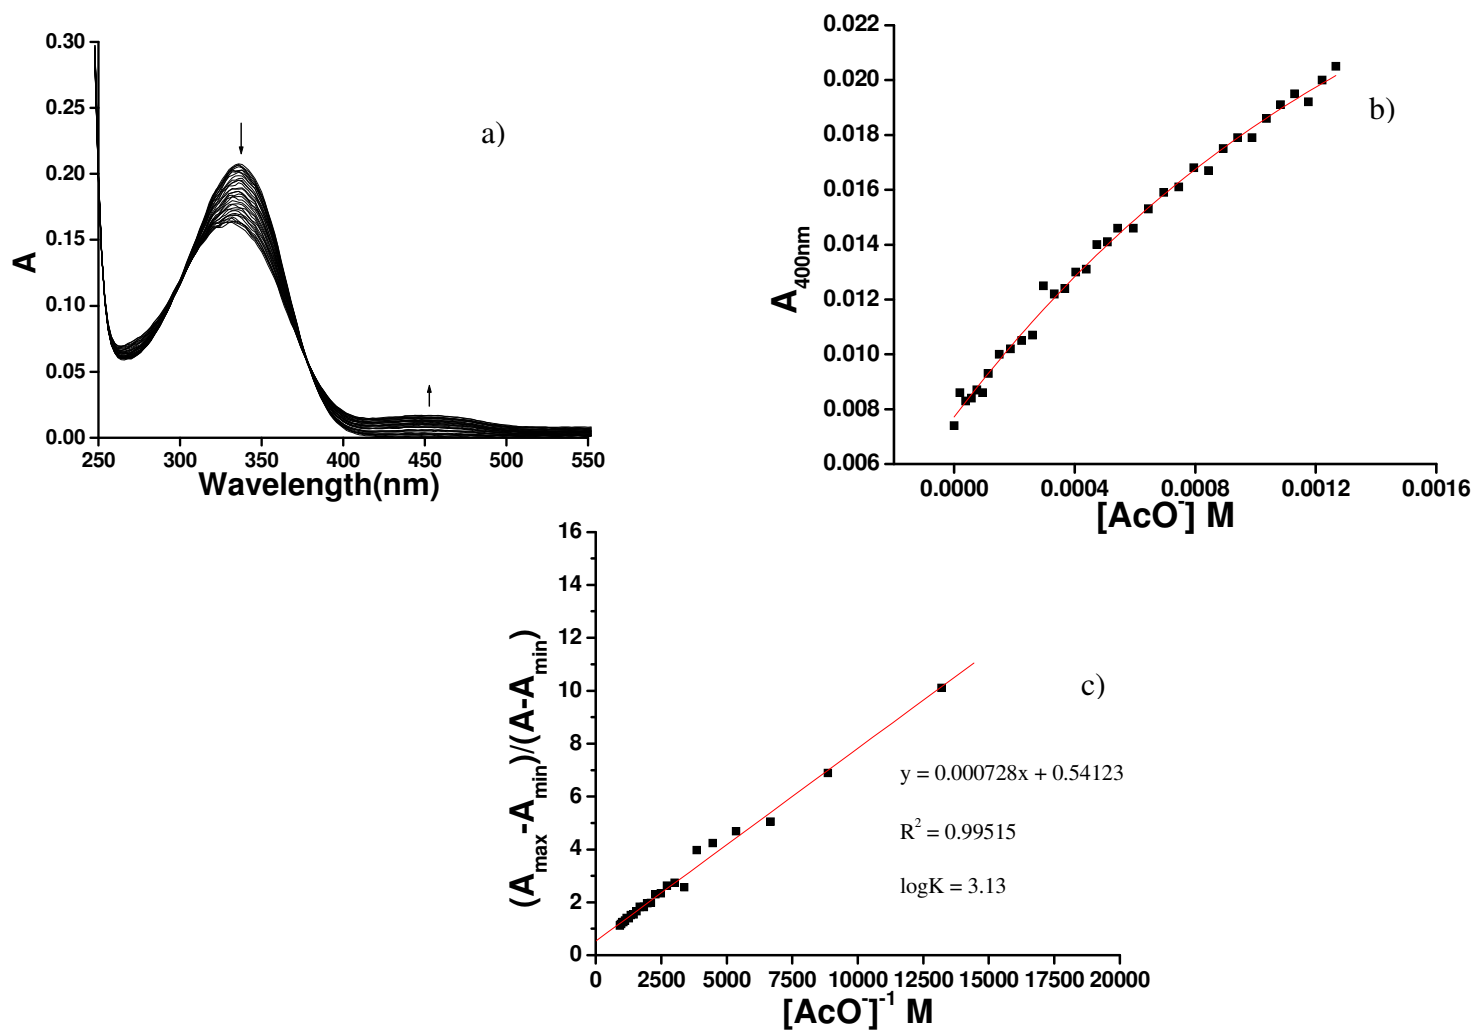

**Figure S44.** a) UV-Vis absorption changes of the titration of a  $1.0 \times 10^{-5}$  M solution of S6 in MeCN/DMF(9.6:0.4)(v/v) with a standard solution of 0.01(M) [Bu<sub>4</sub>N]AcO in MeCN. b) Absorbance changes for S6 at 468 nm on addition of various concentration of [Bu<sub>4</sub>N]AcO. c) Benesi-Hildebrand plot.

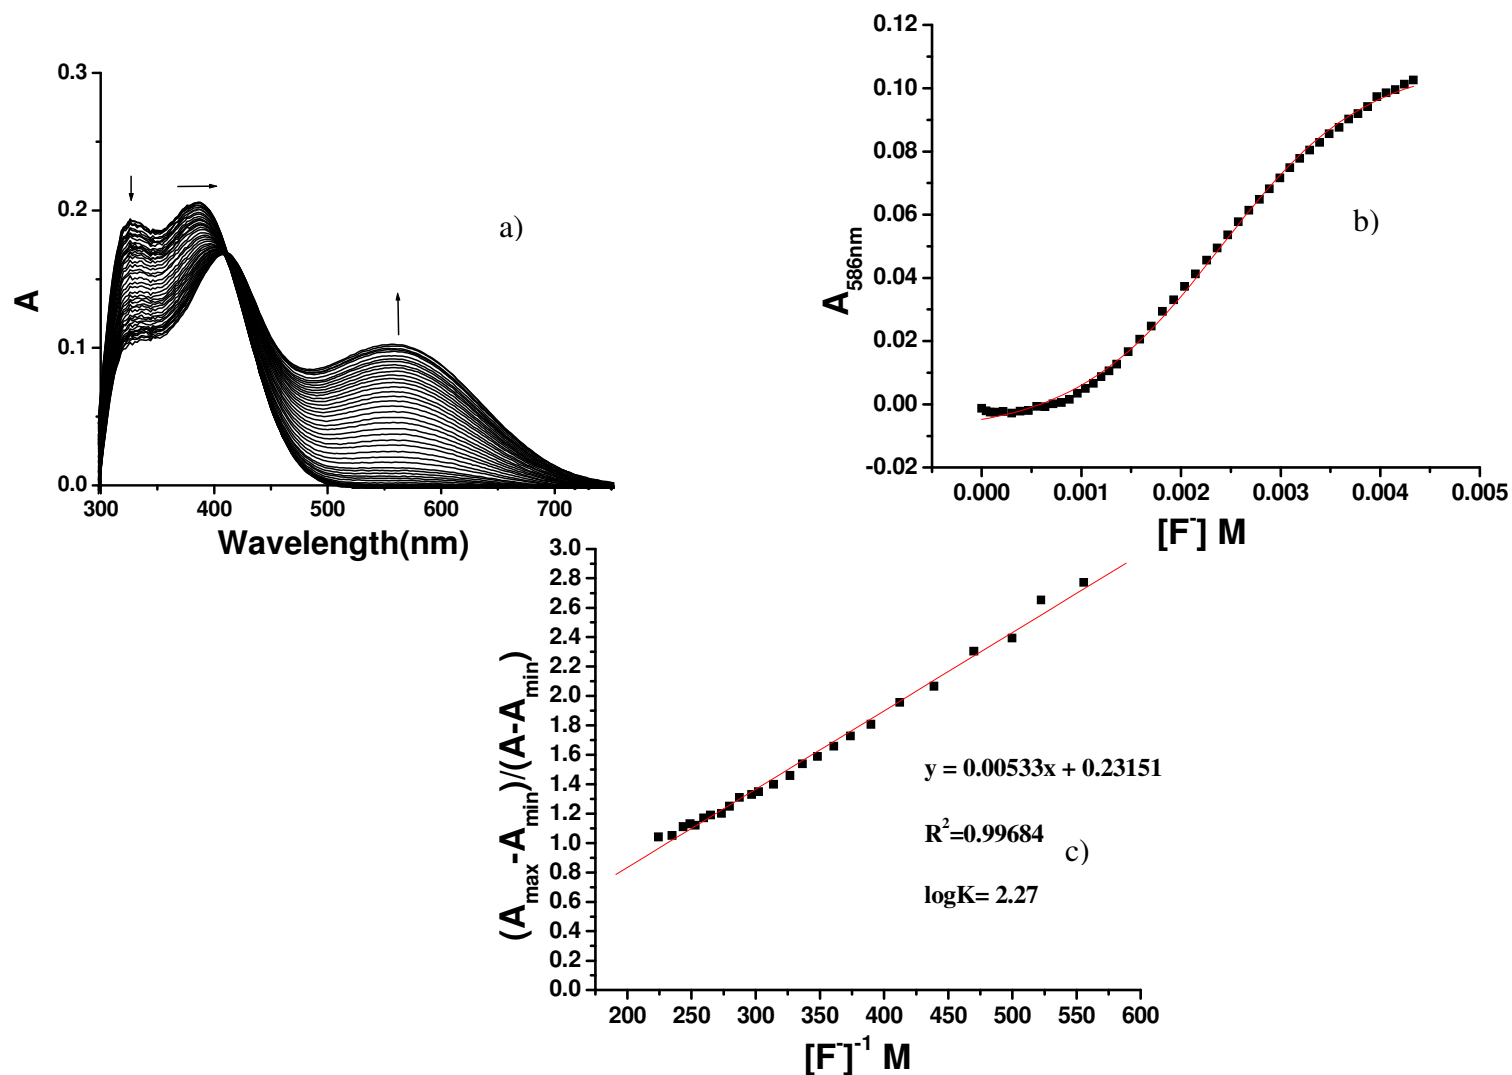

**Figure S45.** a) UV-Vis absorption changes of the titration of a  $1.0 \times 10^{-5}$  M solution of S7 in MeCN/DMF(9.6:0.4)(v/v) with a standard solution of 0.01 (M) [Bu<sub>4</sub>N]F in MeCN. b) Absorbance changes for S7 at 586 nm on addition of various concentration of [Bu<sub>4</sub>N]F. c) Benesi-Hildebrand plot.



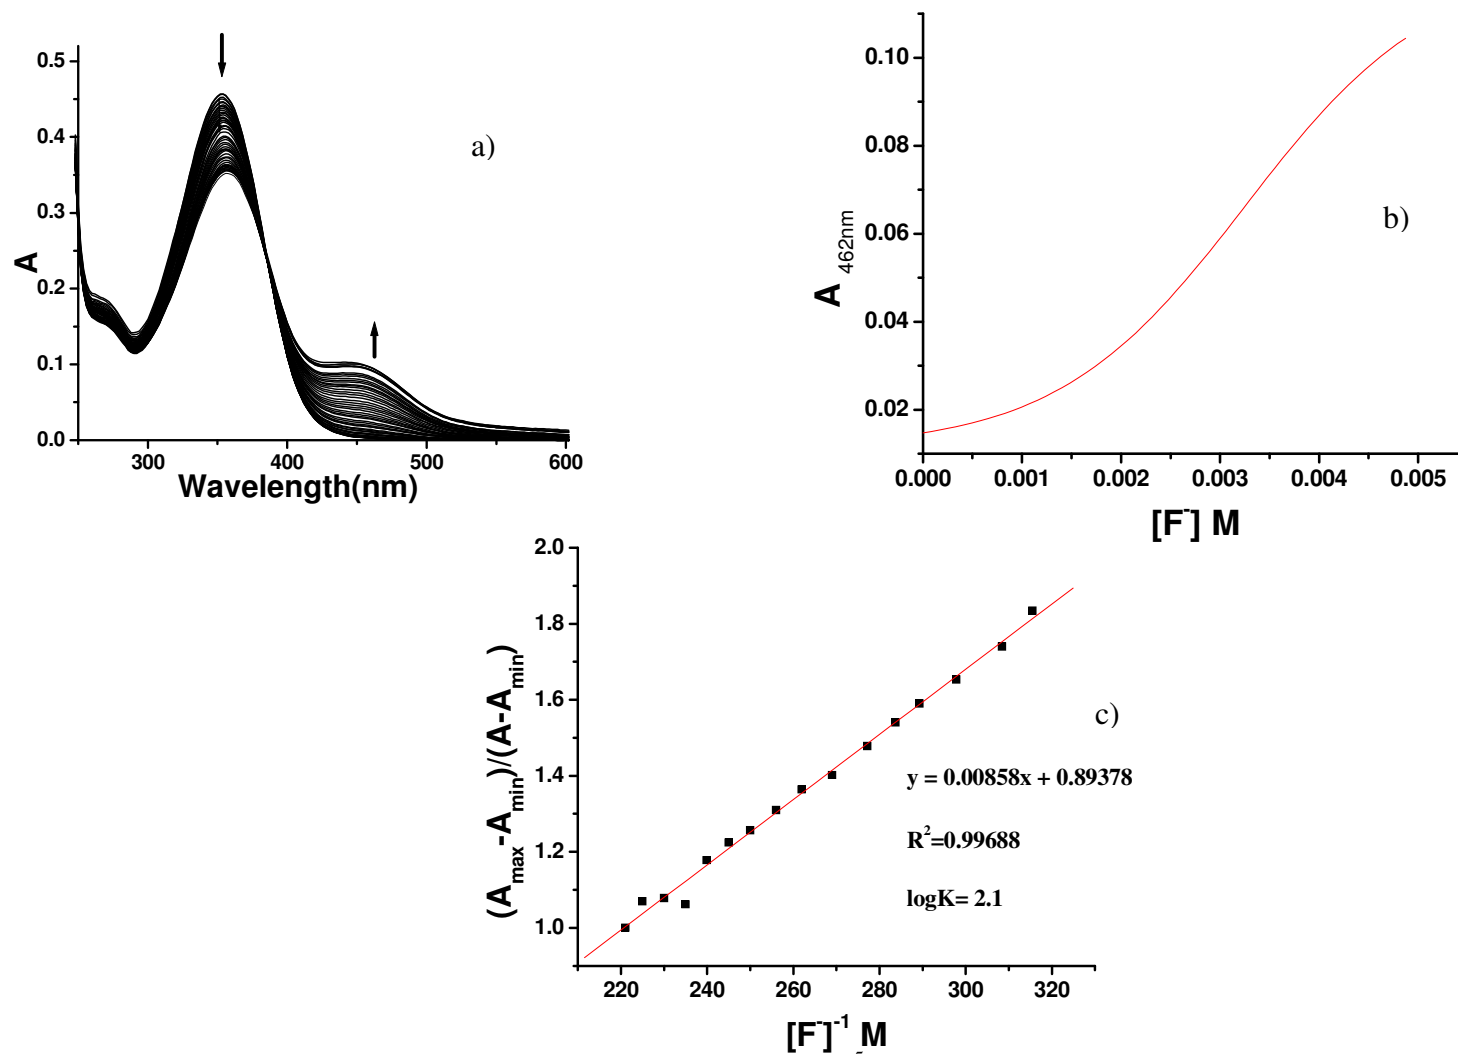

**Figure S46.** a) UV-Vis absorption changes of the titration of a  $1.0 \times 10^{-5}$  M solution of **S8** in MeCN/DMF (9.6:0.4)(v/v) with a standard solution of 0.01 (M)  $[\text{Bu}_4\text{N}]\text{F}$  in MeCN. b) Absorbance changes for **S8** at 462 nm on addition of various concentration of  $[\text{Bu}_4\text{N}]\text{F}$ . c) Benesi-Hildebrand plot.

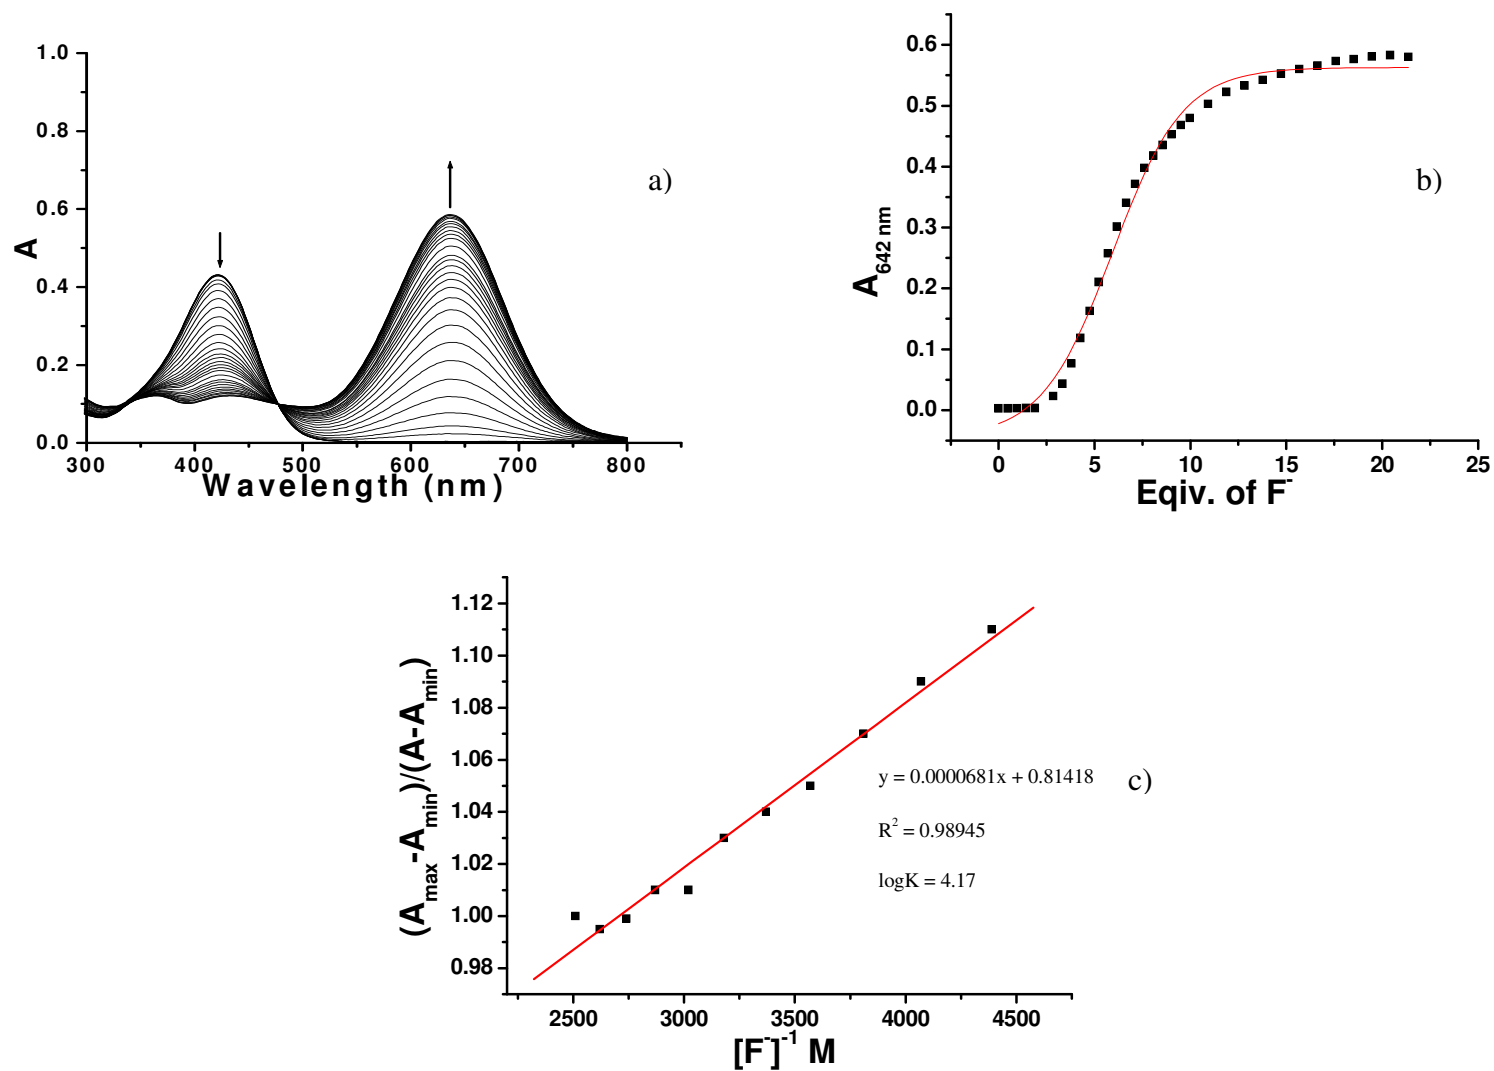

**Figure S47.** a) UV-Vis absorption changes of the titration of a  $1.0 \times 10^{-5}$  M solution of **S9** in MeCN/DMF(9.6:0.4)(v/v) with a standard solution of 0.01 (M) [Bu<sub>4</sub>N]F in MeCN. b) Absorbance changes for **S9** at 642 nm on addition of various concentration of [Bu<sub>4</sub>N]F. c) Benesi-Hildebrand plot.

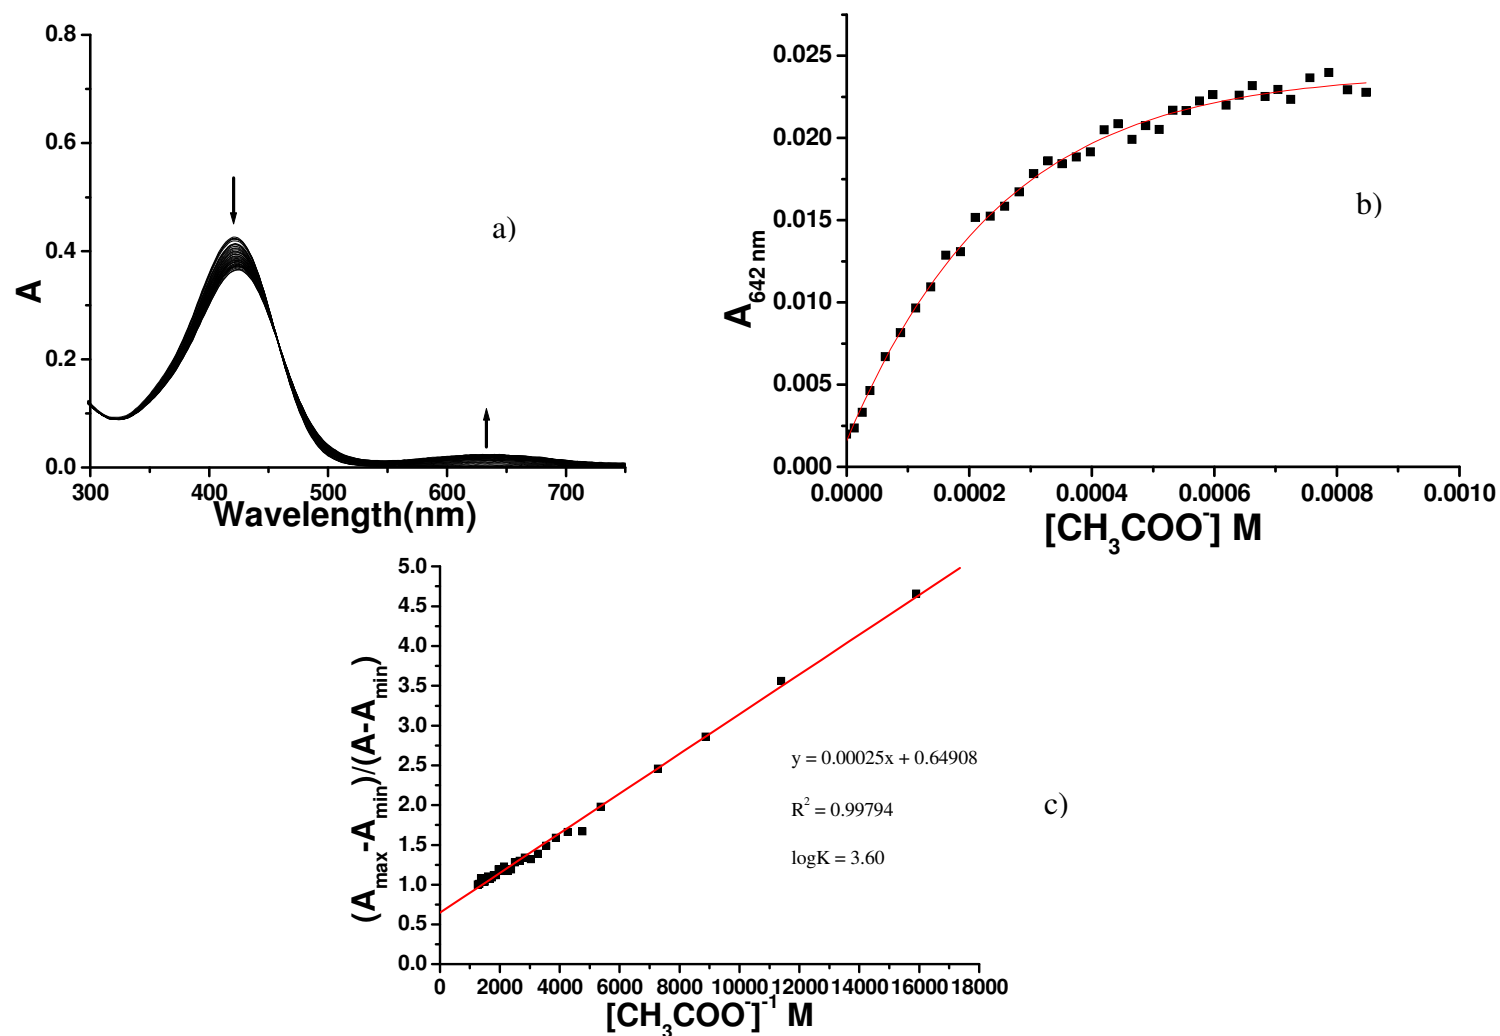

**Figure S48.** a) UV-Vis absorption changes of the titration of a  $1.0 \times 10^{-5}$  M solution of S9 in MeCN/DMF(9.6:0.4)(v/v) with a standard solution of 0.01 (M) [Bu<sub>4</sub>N]AcO in MeCN. b) Absorbance changes for S9 at 642 nm on addition of various concentration of [Bu<sub>4</sub>N]AcO. c) Benesi-Hildebrand plot.

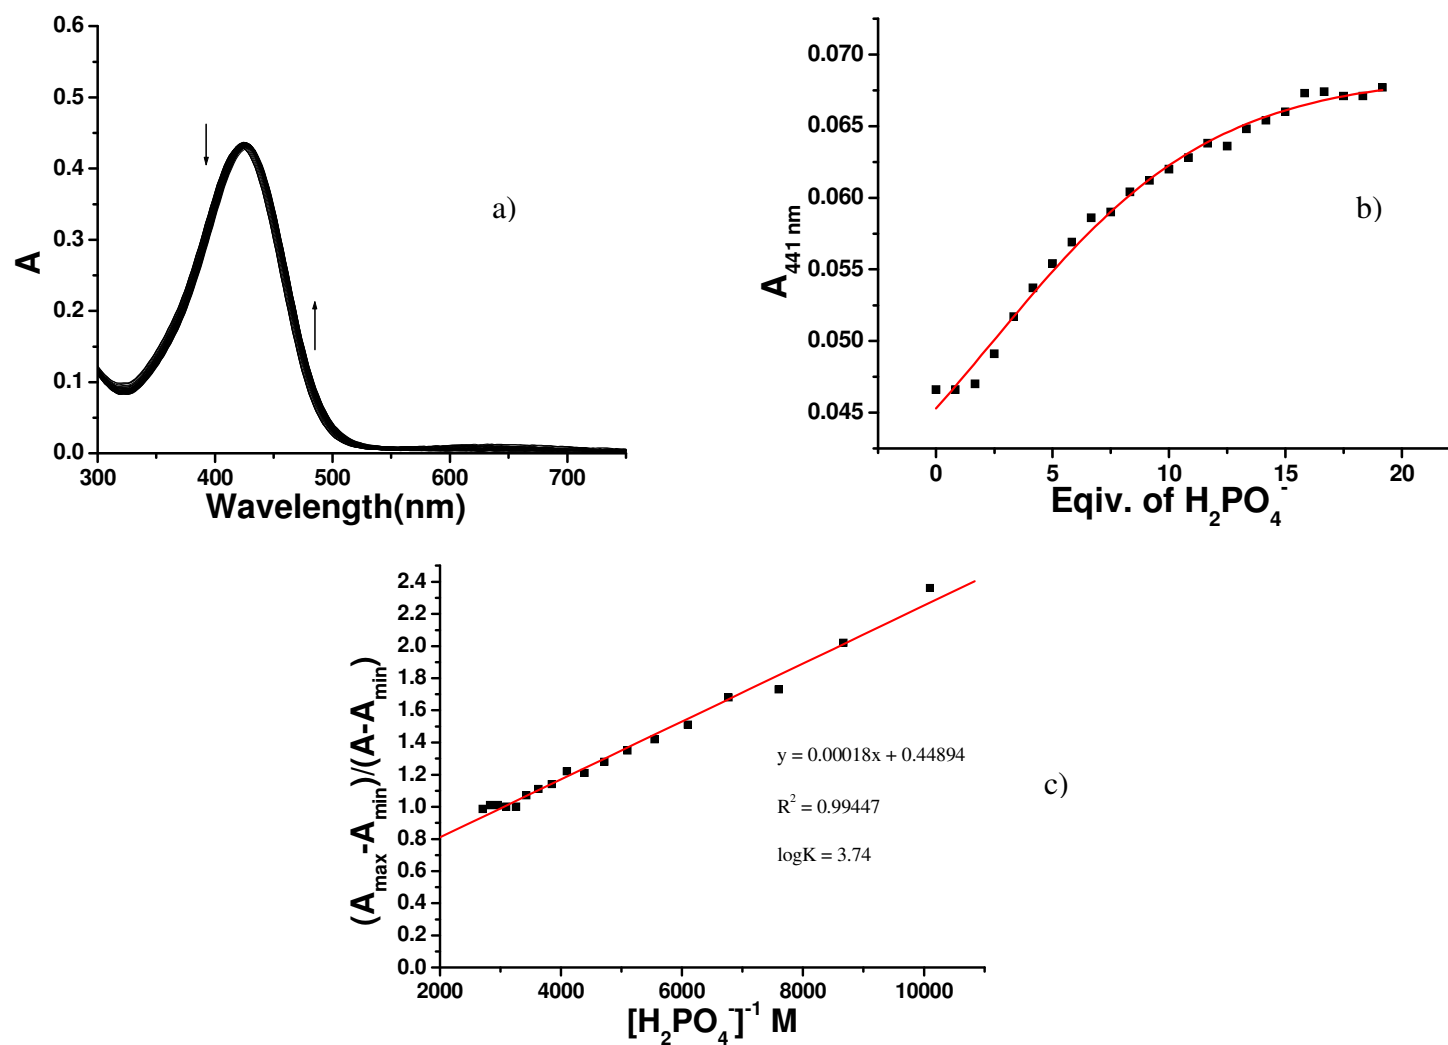

**Figure S49.** a) UV-Vis absorption changes of the titration of a  $1.0 \times 10^{-5}$  M solution of **S9** in MeCN/DMF(9.6:0.4)(v/v) with a standard solution of 0.01 (M)  $[\text{Bu}_4\text{N}]\text{H}_2\text{PO}_4$  in MeCN. b) Absorbance changes for **S9** at 441 nm on addition of various concentration of  $[\text{Bu}_4\text{N}]\text{H}_2\text{PO}_4$ . c) Benesi-Hildebrand plot.

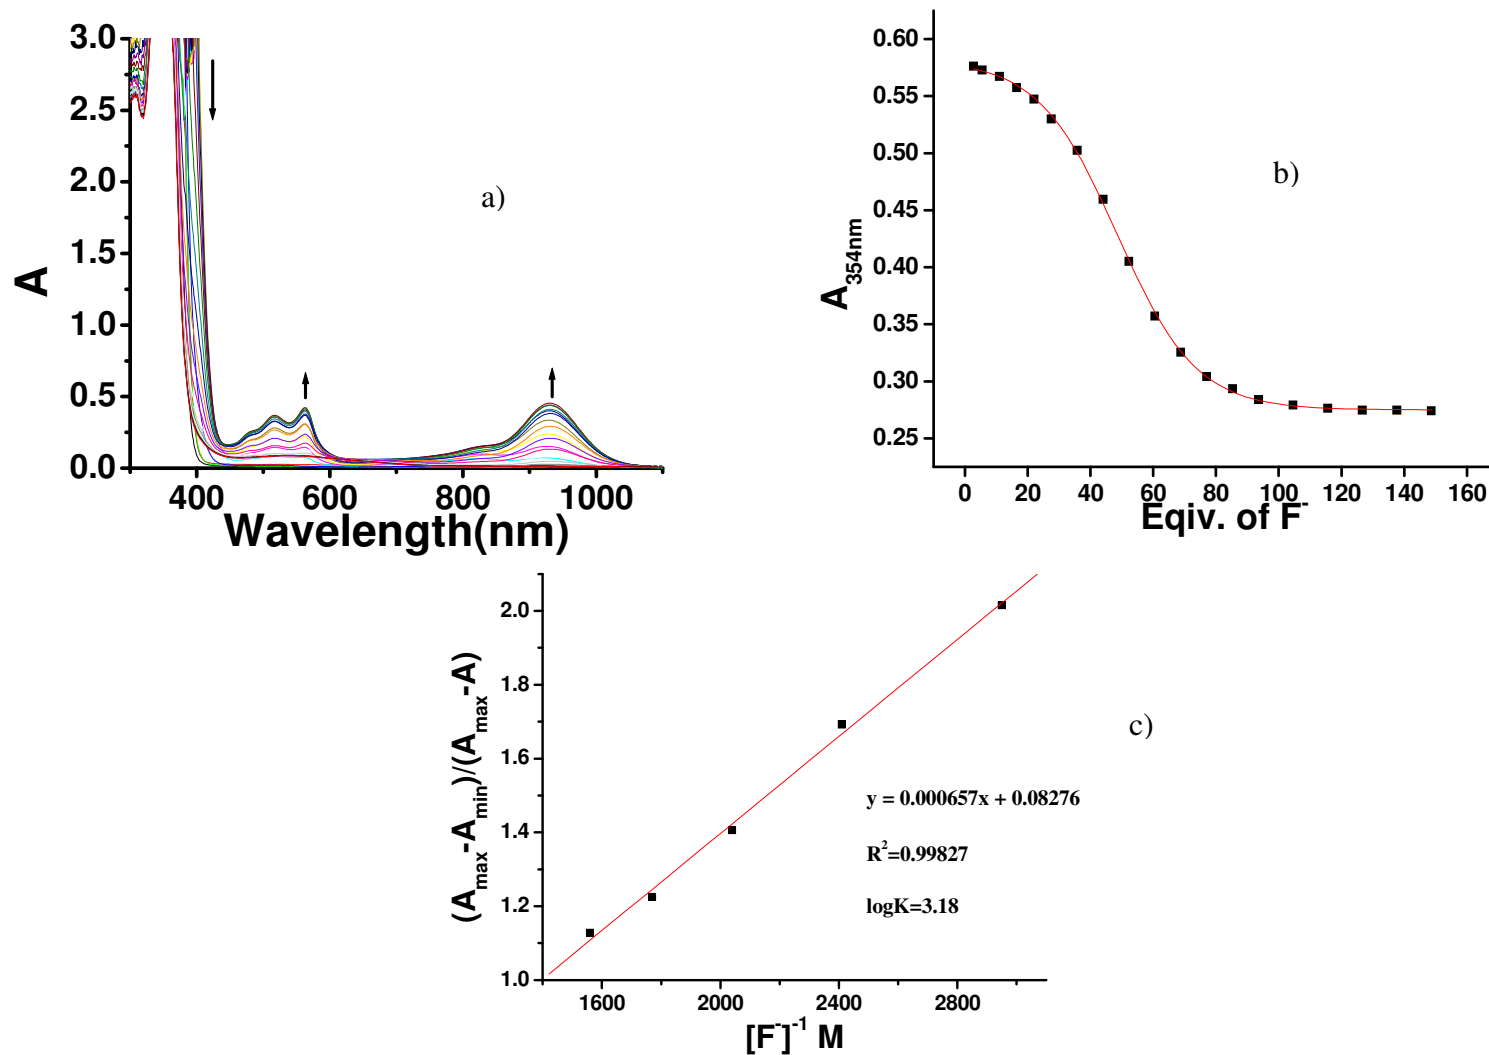

**Figure S50.** a) UV-Vis absorption changes of the titration of a  $1.0 \times 10^{-5} \text{ M}$  solution of **S10** in MeCN/DMF(9.6:0.4)(v/v) with a standard solution of 0.01(M)  $[\text{Bu}_4\text{N}]\text{F}$  in MeCN. b) Absorbance changes for **S10** at 354 nm on addition of various concentration of  $[\text{Bu}_4\text{N}]\text{F}$ . c) Benesi-Hildebrand plot.

**Table S1. Table of Crystallographic parameters**

| <b>Parameters</b>                          | <b>1</b>                                                        | <b>Complex 2</b>                                                              | <b>Complex 3</b>                                              |
|--------------------------------------------|-----------------------------------------------------------------|-------------------------------------------------------------------------------|---------------------------------------------------------------|
| <b>Empirical formula</b>                   | C <sub>16</sub> H <sub>9</sub> F <sub>10</sub> N <sub>5</sub> O | C <sub>36</sub> H <sub>22</sub> F <sub>10</sub> N <sub>5</sub> O <sub>6</sub> | C <sub>37</sub> H <sub>31</sub> N <sub>5</sub> O <sub>4</sub> |
| <b>Formula weight</b>                      | 477.28                                                          | 810.59                                                                        | 609.67                                                        |
| <b>crystal system</b>                      | Monoclinic                                                      | Monoclinic                                                                    | Orthorhombic                                                  |
| <b>Space group</b>                         | P2(1)/n                                                         | P2(1)/m                                                                       | Pbca                                                          |
| <b>a (Å)</b>                               | 16.012(10)                                                      | 6.8654(13)                                                                    | 14.5032(10)                                                   |
| <b>b (Å)</b>                               | 11.932(7)                                                       | 34.567(6)                                                                     | 9.6882(7)                                                     |
| <b>c (Å)</b>                               | 19.682(12)                                                      | 7.1380(14)                                                                    | 44.522(3)                                                     |
| <b>α (deg)</b>                             | 90.00                                                           | 90.000                                                                        | 90.000                                                        |
| <b>β (deg)</b>                             | 104.571(8)                                                      | 98.565(4)                                                                     | 90.000                                                        |
| <b>γ (deg)</b>                             | 90.00                                                           | 90.000                                                                        | 90.000                                                        |
| <b>V (Å<sup>3</sup>)</b>                   | 3639(4)                                                         | 1675.1(5)                                                                     | 6255.7 (8)                                                    |
| <b>Z</b>                                   | 8                                                               | 2                                                                             | 8                                                             |
| <b>d<sub>calc</sub> (g/cm<sup>3</sup>)</b> | 1.742                                                           | 1.607                                                                         | 1.295                                                         |
| <b>Crystal size (mm<sup>3</sup>)</b>       | 0.32 x 0.07 x 0.05                                              | 0.15 x 0.09 x 0.08                                                            | 0.18 x 0.03x 0.02                                             |
| <b>Diffractometer</b>                      | Smart CCD                                                       | Smart CCD                                                                     | Smart CCD                                                     |
| <b>F(000)</b>                              | 1904                                                            | 822                                                                           | 2560                                                          |
| <b>μ MoKα (mm<sup>-1</sup>)</b>            | 0.184                                                           | 0.148                                                                         | 0.086                                                         |
| <b>T (K)</b>                               | 120 (2)                                                         | 100 (2)                                                                       | 100(2)                                                        |
| <b>θ max</b>                               | 24.39                                                           | 25.00                                                                         | 25.00                                                         |
| <b>ObservedReflections</b>                 | 23147                                                           | 15838                                                                         | 55819                                                         |
| <b>Parameters refined</b>                  | 633                                                             | 232                                                                           | 417                                                           |
| <b>R<sub>1</sub>; WR<sub>2</sub></b>       | 0.0499 ; 0.1123                                                 | 0.0334 ; 0.0842                                                               | 0.0879 ; 0.2308                                               |
| <b>GOF (F2)</b>                            | 1.022                                                           | 1.078                                                                         | 1.161                                                         |

**Table S2. Hydrogen bonding interactions in 1.**

| <b>D-H...A</b> | <b>D-H (Å)</b> | <b>H...A(Å)</b> | <b>D...A(Å)</b> | <b>∠ D-H...A</b> |
|----------------|----------------|-----------------|-----------------|------------------|
| N9-H9...O42    | 0.843          | 1.944           | 2.766(5)        | 165.0            |
| O44-H44...N12  | 0.800          | 2.042           | 2.807(6)        | 160.0            |
| N29-H29...O44  | 0.895          | 1.914           | 2.790(6)        | 165.7            |
| O42-H42...N32  | 0.850          | 1.982           | 2.821           | 169.2            |

**Table S3. Hydrogen bonding interactions in Complex 2.**

| <b>D-H...A</b> | <b>D-H (Å)</b> | <b>H...A(Å)</b> | <b>D...A(Å)</b> | <b>∠ D-H...A (deg)</b> |
|----------------|----------------|-----------------|-----------------|------------------------|
| N11-H11...O25  | 0.860          | 2.070           | 2.8623(18)      | 152.3                  |
| N9-H9...O17    | 0.860          | 1.930           | 2.7916(14)      | 178.1                  |
| O26-H26...O17  | 0.820          | 1.810           | 2.6179(11)      | 170.6                  |

**Table S4. Hydrogen bonding interactions in Complex 3.**

| <b>D-H...A</b> | <b>D-H (Å)</b> | <b>H...A(Å)</b> | <b>D...A(Å)</b> | <b>∠ D-H...A (deg)</b> |
|----------------|----------------|-----------------|-----------------|------------------------|
| O3-H3X...O2    | 0.820          | 1.770           | 2.593(4)        | 175.40                 |
| N2-H2A...O1    | 0.860          | 1.930           | 2.710(4)        | 149.90                 |
| N3-H3A...O1    | 0.860          | 2.240           | 2.970(4)        | 142.70                 |
| N3-H3B...O4    | 0.860          | 2.180           | 2.899(4)        | 140.80                 |
| N4-H4A...O2    | 0.860          | 1.920           | 2.741(4)        | 158.90                 |



## Methods.

The binding constant values of anions with **S1-S10** have been determined from the absorption data following the modified Benesi–Hildebrand equation.

$$1/\Delta A = 1/\Delta A_{\max} + (1/K[\text{Anion}])(1/\Delta A_{\max}).$$

Here,  $\Delta A = A - A_{\min}$ ,  $\Delta A_{\max} = A_{\max} - A_{\min}$ .

Where,  $A_{\min}$ ,  $A$ ,  $A_{\max}$  are the absorption of **S1-S10** considered in the absence of anions, at an intermediate, and at a concentration of complete concentration.

$K$  is Binding constant,  $[\text{Anion}]$  is concentration of anion.

From the Plot of  $(A_{\max} - A_{\min}) / (A - A_{\min})$  against  $[\text{Anion}]$  for **S1-S10**, the value of  $K$  ( $\pm 10\%$ ) extracted from the slope.

## References

- (1) (a) SAINT and XPREP, 5.1 ed.; Siemens Industrial Automation Inc.: Madison, WI, 1995. Sheldrick, G. M. (b) SADABS, *empirical absorption Correction Program*; University of Göttingen: Göttingen, Germany, 1997.
- (2) Sheldrick, G. M. *SHELXTL Reference Manual: Version 5.1*; Bruker AXS: Madison, WI, 1997.
- (3) Sheldrick, G. M. *SHELXL-97: Program for Crystal Structure Refinement*; University of Göttingen: Göttingen, Germany, 1997.
- (4) Spek, A. L. *PLATON-97*; University of Utrecht: Utrecht, The Netherlands, 1997.
- (5) Mercury 2.2 supplied with Cambridge Structural Database, CCDC, Cambridge, UK.
